# Supplementary material for: Underestimation of Anaerobic Decomposition Rates in Sphagnum Litterbag Experiments by the Holocene Peatland Model Depends on Initial Leaching Losses
Source: Copernicus journal article supplement (doi:10.5194/egusphere-2024-1739), 2024-06-26
Supplement: Supplementary file [file egusphere-2024-1739-AC3-supplement.pdf]

# Reply to Anonymous Referee #3 for “Underestimation of Anaerobic Decomposition Rates in Sphagnum Litterbag Experiments by the Holocene Peatland Model Depends on Initial Leaching Losses”

Henning Teickner<sup>1,2,\*</sup>      Edzer Pebesma<sup>2</sup>      Klaus-Holger Knorr<sup>1</sup>

22 December, 2024

<sup>1</sup> ILÖK, Ecohydrology & Biogeochemistry Group, Institute of Landscape Ecology, University of Münster, 48149, Germany

<sup>2</sup> IfGI, Spatiotemporal Modelling Lab, Institute for Geoinformatics, University of Münster, 48149, Germany

\* Correspondence: Henning Teickner <henning.teickner@uni-muenster.de>

Comments made by the reviewer start with a bold **Q** while our reply starts with a bold **A**. In section “Additional changes” we list additional changes we would like to incorporate in an updated version of the manuscript.

## 1 Reply to comments

### 1.1 General comments

1. **Q:** The authors tested whether the Holocene Peatland Model (HPM) can predict Sphagnum decomposition rates from litterbag experiments. They used a series of modifications of the model’s decomposition module in combination with Bayesian methods to get posterior distributions of the model parameters. They focused on the decomposition module of the HPM as a strategy to reduce uncertainty and get more precise model predictions. As much as this study has relevance for the advancement of peatland biogeochemistry modelling, major restructuring of the manuscript should be done before publication.

**A:** We thank the reviewer for their helpful comments. We agree that we should have described in more detail which equations of the HPM are considered as HPM decomposition module, how we modified them, and how we linked them to the litterbag decomposition model. We hope that our changes suggested below address the issues.

Since we did a complete re-write of large parts of the manuscript, we have attached the manuscript with the suggested changes because we think that this is easier than to list all changes we made here, disconnected from the rest of the text.

2. **Q:** Generally speaking, the writing needs to be improved before this study is published. Sentence construction is often confusing. Furthermore, sentences often do not connect well with each other, creating confusing paragraphs. This hinders the quality of the study and makes it hard to understand, which from the perspective of manuscript-revising is counter-productive. As a general recommendation, try writing shorter sentences with concise ideas (a lot of the sentences here could be split into 2 or even 3 sentences).

**A:** We thank the reviewer for this suggestion and note that the other two reviewers made similar suggestions. We suggest to simplify sentences and split long sentences where useful.

3. **Q:** I don't find that the title reflects the contents of the paper. In the title they state that initial leaching losses are important to determine decomposition rates. However, in the discussion, this is only brought up briefly in the last paragraph. Most of the discussion revolves around the quality of the litterbag studies, and water table depth parameters  $c_2$  and  $W_{opt}$ . Thus, it is hard to see how they came to this conclusion, when the focus of the manuscript is not there. Additionally, it's not clear that HPM underestimates decomposition rates. They should either change the title accordingly, or restructure the manuscript to make sure their point is coming across.

**A:** We agree that the title should better reflect the contents of the manuscript. We wanted to include initial leaching losses here to mention the limiting factor to our statement about anaerobic decomposition rates. We suggest to change the title to:

“Peat Oxidic and Anoxic Controls of *Sphagnum* Decomposition Rates in the Holocene Peatland Model Decomposition Module Estimated from Litterbag Data”

In addition, we suggest to re-write large parts of the text. In the updated Results section, we now hope to better describe differences in predicted/estimated decomposition rates under oxidic and anoxic conditions between the models and to more reduce the attention on initial leaching losses. Please see the attached version of the manuscript with the suggested changes.

4. **Q:** The abstract does not provide a complete summary of the study. Generally, this section lacks a clear definition of what are the original contributions of this work and what are precedents from literature. There should be a description of the aims of the work and methods in this section. I suggest that you structure this section the same way the paper is structured, covering the introduction, methods, results and discussion sections in the abstract.

**A:** We thank the reviewer for this suggestion. We suggest a complete re-write of the abstract. Please see the attached version of the manuscript with the suggested changes.

5. **Q:** It is important that the authors clarify what is the difference between the current work and another work currently under revision (“A Synthesis of *Sphagnum* litterbag

Experiments: Initial Leaching Losses Bias Decomposition Rate Estimates”). The study is only briefly described in the Introduction section, but there are big interactions between that study and the current one. I suggest giving more details about that previous study in the introduction, methods and discussion sections. This will help the reader understand what makes the two studies different, how they were combined, and ultimately what are the original contributions of the current study.

**A:** We thank the reviewer for this suggestion. The other two reviewers made similar suggestions and we therefore suggest to extensively rewrite the introduction and give a detailed description of our modeling approach.

We suggest to introduce “initial leaching loss” already earlier by changing the part starting in l. 59 from

“Since decomposition rates have been estimated with different litterbag decomposition models in previous studies, their values are not directly comparable and therefore raw data are necessary to obtain estimates directly comparable to predictions from a certain peatland model (Yu et al., 2001; Teickner et al., 2024). Recently, we used available Sphagnum litterbag data to estimate decomposition rates which can be directly compared to decomposition rates predicted by the HPM (Teickner et al., 2024).”

to

“Since decomposition rates have been estimated with different litterbag decomposition models in previous studies, their values are not directly comparable. Moreover, initial leaching losses (losses of soluble compounds, which do not originate from microbial depolymerization, due to leaching during the first days to weeks of incubation) can bias decomposition rate estimates if they are not explicitly considered and can vary between species and experiments (Yu et al., 2001; Teickner et al., 2024). Therefore, raw data (remaining masses) are necessary for any meaningful test of decomposition modules with litterbag data. The recently published Peatland Decomposition Database (Teickner and Knorr, 2024b) contains raw data from available *Sphagnum* litterbag experiments and therefore allows to estimate parameters with any mass loss-based decomposition model and therefore also allows to consider initial leaching losses.”

We suggest to change the sentence starting in l. 65 from

“Remaining masses in litterbag experiments are often very variable, even under controlled environmental conditions (e.g. Bengtsson et al. (2018)), and for many litterbag experiments, a range of decomposition rates may produce similar predictions for remaining masses if a litterbag decomposition model compatible with the HPM is used (Teickner et al., 2024).”

to

“Remaining masses in litterbag experiments are often very variable, even under controlled environmental conditions (e.g., Bengtsson et al., 2018), and for many litterbag experiments, a range of decomposition rates may produce similar predictions for remaining masses (e.g., Yu et al., 2001), also if a litterbag decomposition model compatible with the HPM is used (Teickner et al., 2024).”

We suggest to rewrite the entire paragraph (ll. 87 to 91) from

“To address these aims, we developed a model that combines the HPM decomposition module and our previous *Sphagnum* litterbag decomposition model, which estimates decomposition rates in available litterbag experiments while considering initial leaching losses (Teickner et al., 2024). Estimated decomposition rates of this model can be directly compared to decomposition rates predicted by the HPM decomposition module because the formula to compute remaining masses from decomposition rates is the same.”

to

“To address these aims, we used the HPM decomposition module to predict decomposition rates in available litterbag experiments and compared these to decomposition rates estimated for the same litterbag experiments with a litterbag decomposition model that considers initial leaching losses (Teickner et al., 2024) (Fig. 1). These predictions require the peat degree of saturation, which we estimate with the modified Granberg model (Granberg et al., 1999; Kettridge and Baird, 2007) from water table depth data reported in these studies. Furthermore, some *Sphagnum* litterbag experiments do not report water table depths and therefore cannot be used to test the HPM, but they still provide information on initial leaching losses and decomposition rates and therefore help to constrain parameter estimates. We therefore include these data via Bayesian hierarchical modeling in the litterbag decomposition model. In summary, our approach combines the HPM decomposition module, the modified Granberg model, and a *Sphagnum* litterbag decomposition model that allows to consider initial leaching losses and to pool information across litterbag experiments (Teickner et al., 2024). While this approach has its limitations, it exploits available data as far as possible, while considering known confounders and propagating relevant uncertainties.”

We introduce a schematic representation of our modeling approach already in the introduction in Fig. 1 at the end of our reply to this comment.

Finally, we suggest to modify section 2.2.1. to provide a more detailed description of our modeling approach. Please see the attached version of the manuscript with the suggested changes.

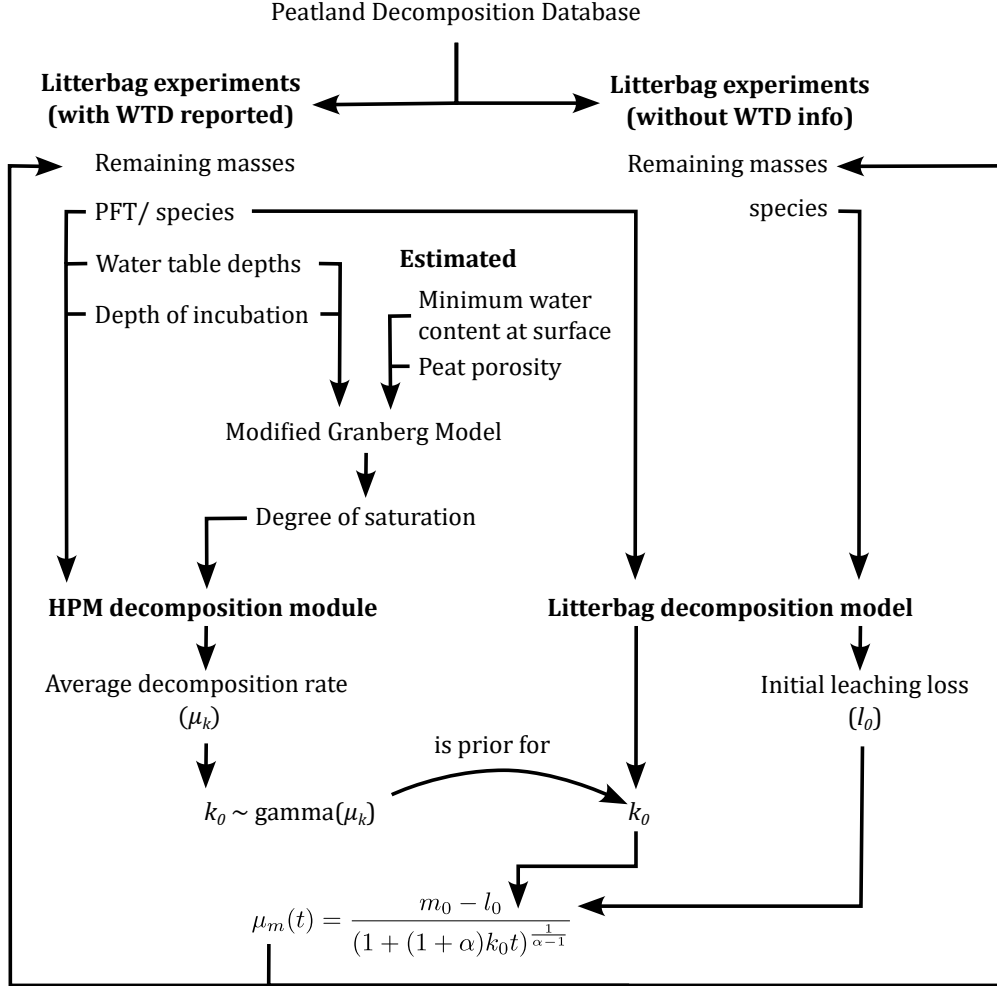

Figure 1: Conceptual representation of the modeling approach. Arrows represent flows of information. Litterbag data that have information on water table depths (WTD) and incubation depths are used to estimate average decomposition rates with the HPM decomposition module ( $\mu_k$ ). The HPM decomposition module needs plant functional type identity, peat degree of saturation, WTD, and incubation depth to predict decomposition rates. The modified Granberg model is used to estimate peat degree of saturation at incubation depths from WTD, minimum water content at the surface, and porosity, of which the latter two are estimated from the remaining masses. The litterbag decomposition model is used to estimate decomposition rates ( $k_0$ ) for all litterbag studies, including those that have information on WTD and those that have not. A gamma distribution with  $\mu_k$  as average is used as prior distribution for  $k_0$  for the litterbag experiments that have information on WTD (curved arrow). This helps to constrain initial leaching loss and decomposition rate estimates for studies that can be predicted with the HPM decomposition module. The Litterbag decomposition module also estimates initial leaching losses ( $l_0$ ) for all litterbag experiments. The equation at the bottom uses these to estimate remaining masses in the litterbag experiments. The litterbag decomposition model is described in more detail in section 2.2.1. See the text for further details.

6. **Q:** One of the main confusions comes from the so-called HPM module and the decomposition model. They are both introduced in the Methods section, but it is not clear what the distinction between them is. Formulas for both models should be defined clearly in this section. And if they're reported on the supplementary material, instead, that should be stated earlier (not 205 lines into the text). Also, since the HPM module is in itself a decomposition model, it is confusing that the other model is just called decomposition model and not something else to distinguish them. Finally, there should be a clear description of the combination of both models. As it is now, the study is not very reproducible from the information presented in the manuscript. The information on the supplementary material (S1 and S2) is full of parameters and formulas, everything written with initials and numbers, but most of them lack any explanation or description of what they are.

**A:** We hope that our reply to comment 4 of reviewer 3 addresses most parts of this issue.

- Regarding “Also, since the HPM module is in itself a decomposition model, it is confusing that the other model is just called decomposition model and not something else to distinguish them.”: We now clearly distinguish between the litterbag decomposition model and the HPM decomposition module in the text.
- Regarding “The information on the supplementary material (S1 and S2) is full of parameters and formulas, everything written with initials and numbers, but most of them lack any explanation or description of what they are.”: We suggest to remove supporting information S1 as all formulas are now described in the main text. We also changed the symbols used to make the formulas prettier.

7. **Q:** Just an idea, the names of the models are complicated to read and remember. So, I suggest you give them more friendly names like HPM-standard, HPM-peat, HPM-all HPM-leaching, and HPM-outlier, or maybe just use less initials. This is only a suggestion, but I encourage you to do it if you really want readers to remember the differences between each model without having to decipher long combinations of initials.

**A:** We think that these suggestions are good and we suggest to include them in our study. Please see the attached version of the manuscript with the suggested changes.

8. **Q:** Another main point is that throughout the introduction, results and discussion sections they mention many times aerobic/anaerobic or oxic/anoxic decomposition rates. However, it is not declared in the Methods section how this is considered in the models. From context, I figured out it has to do with water table depth, but specifically how this is incorporated in calculations is not defined. Please, make sure this is clear since it seems to be a big point for your study.

**A:** We hope that our reply to comment 4 of reviewer 3 addresses this issue.

9. **Q:** The Results section could be improved. As it is now, it's not very well structured, there are too many very specific sub-sections. Also, results in the figures are discussed in many sections without a clear order. So first, I suggest making fewer sub-sections.

Second, try making sub-sections that correspond to specific figures or tables. This will make it easier to read and to find the data in the manuscript.

**A:** We completely re-wrote the Results section and hope that the updated version addresses this comment. Please see the attached version of the manuscript with the suggested changes.

## 1.2 Specific comments

### 1.2.1 Abstract

11. **Q:** Line 4: This sentence is not clear. I suggest rephrasing it, maybe try splitting it into two shorter sentences. Also, how are the “large uncertainties” allowing the fitting of the model?

**A:** We thank the reviewer for this suggestion. We tried to improve this part of the abstract. Please see our reply to comment 4 of reviewer 3.

12. **Q:** Line 14: The sentence starting with “Based on previous...” is not clear. Who did the previous analysis, the same group of researchers or others? Are the updated parameter estimates part of the results of this work?

**A:** We refer here to the sensitivity analyses conducted in Frohking et al. (2010), Quillet et al. (2013a), and Quillet et al. (2013b), so work done by others several years ago. We think that the abstract states clearly that these sensitivity analyses are not part of the current study (“previous”) and we think that, while reading the abstract, it is not relevant to know who did this work. In the text, we explicitly cite the studies that provide the sensitivity analyses and we therefore think that it is clear that we are not the same authors who conducted the sensitivity analyses.

### 1.2.2 Introduction

13. **Q:** Line 19: Is “litter that does not decompose fast even under more conditions facilitating microbial decomposition” supposed to refer to litter quality/traits? I suggest rephrasing this part, since the English is not quite correct, and the scientific concepts are not quite clear.

**A:** Yes, this refers to litter chemical and physical properties that decrease decomposition rates. We think that litter recalcitrance is a known scientific concept, but we agree that this sentence should be clarified. We suggest to change it to:

“Compared to other ecosystems, northern peatlands usually have small decomposition rates because of cold temperatures, high water table levels, acidic pH value, and litter that does not decompose fast even under environmental conditions favorable for decomposition (van Breemen, 1995; Rydin et al., 2013).”

14. **Q:** Line 29: The “first” problem as it is written is not clear. Who are “they” (citation)? Maybe flip the order of the sentence to put the actual problem of the model in the focus.

**A:** “They” refers to global tests, not studies or persons. We agree that this sentence can be improved. We suggest to change it from

“First, they test entire peatland models against observed data and thus can identify the parameter values or model equations that cause observed discrepancies less reliably.”

to

“First, they cannot reliably identify the parameter values or model equations that cause discrepancies between model predictions and measurements because they test entire peatland models against observed data.”

15. **Q:** Line 41: Could you explain why this approach is only useful for short term predictions?

**A:** Litterbag experiments have been conducted only for few years and mostly with fresh litter samples. Based on such experiments, the slow-down of decomposition rates over time that is assumed in the HPM cannot be reliably estimated (Frolking et al., 2001; Teickner et al., 2024).

Within the framework of the HPM, one could use litter of already decomposed samples (e.g. *Sphagnum* peat samples from larger depths) and conduct litterbag experiments with these, but only if one would also know the degree of decomposition (fraction of initial mass the sample has already lost) to estimate the slow-down of decomposition rates. We are not aware of a reliable method to estimate the degree of decomposition for such samples and therefore such analyses are not possible yet, as far as we know. To briefly mention this in the text, we suggest to change the sentence to:

“Admittedly, such a test is restricted to short time ranges and not representative for long-term decomposition rates which may differ from that of fresh litter (e.g., Frolking et al., 2001), but future tests with different scope and applications of the model will benefit from the reduced parameter uncertainties and can consider where the model fails already on short time scales.”

16. **Q:** Line 48: How is this proposal different from what was done before as mentioned in line 45?

**A:** To clarify this, we suggest to add before this sentence:

“These sensitivity analyses used assumed parameter ranges that are not informed by litterbag experiments.”

17. **Q:** Line 62: This sounds very similar to the scope of the current study. How are they different?

**A:** We hope that our reply to comment 4 of reviewer 3 addresses how the scopes of the two studies are different. As mentioned there, we suggest to change this sentence to avoid confusions with our previous study. The suggested changes are:



“The recently published Peatland Decomposition Database (Teickner and Knorr, 2024b) contains raw data from available *Sphagnum* litterbag experiments and therefore allows to estimate parameters with any mass loss-based decomposition model and therefore also allows to consider initial leaching losses.”

18. **Q:** Line 68: What are the 5 parameters?

**A:** These are the five parameters listed in Tab. 1 (where we count  $k_{0,i}$  as one parameter since only one of these parameters is used to predict a specific decomposition rate). We think that mentioning these already here would be a distraction, but if the reviewer has a good suggestion how to include this information here, we would be grateful for further comments.

19. **Q:** Line 84: Both hypotheses here seem more like predictions.

**A:** We do not understand this comment. A hypothesis is a prediction made with the intention to test it against measurements or, more generally, other predictions. Therefore, it is not surprising that our hypotheses are predictions.

We are aware that some sources distinguish between hypotheses and predictions (for example, a quick search returned <https://www.trentu.ca/academicskills/how-guides/how-succeed-math-and-science/writing-lab-reports/understanding-hypotheses-and>), however we would label these as “theory” and “prediction”, respectively. We see that there is no uniform definition, but we do not think the hypotheses as stated in our manuscript cause too much confusion.

However, since the hypotheses are rather trivial, we suggest to not mention them explicitly any more and therefore suggest to remove our list of hypotheses.

### 1.2.3 Methods

20. **Q:** Line 99: Could you specify if the samples were buried or on the surface?

**A:** Reviewer 2 (comment 19) suggested to include a table with general information on the number of litterbag experiments per species. We suggest to include an additional column that gives the depth range over which litterbags were buried there. The table is as follows:

Table 1: Overview on litterbag experiments included for each *Sphagnum* taxon in this study. “HPM microhabitat” is the HPM microhabitat assigned to each taxon. Taxa without value are not considered in Johnson et al. (2015) (see section 2.2.2). “Number of experiments” is the number of litterbag experiments available from the Peatland Decomposition Database (these are either individual replicates or average values of replicates, depending on what data were reported in the studies). “Number of experiments with WTD data” is the number of litterbag experiments that also report water table depths and for which we therefore could make predictions with the HPM decomposition module. “Depth range” are the maximum and minimum depth below the peat surface at which litterbags were placed [cm]. Missing values mean that no study reported depths.

| Taxon                                       | HPM microhabitat | Number of studies | Number of experiments | Number of experiments with WTD data | Depth range |
|---------------------------------------------|------------------|-------------------|-----------------------|-------------------------------------|-------------|
| <i>Sphagnum spec.</i>                       |                  | 2                 | 16                    | 10                                  | 10, 30      |
| <i>S. angustifolium</i>                     | Hummock          | 4                 | 14                    | 8                                   | 1, 30       |
| <i>S. auriculatum</i>                       |                  | 1                 | 3                     | 0                                   | 0, 6        |
| <i>S. balticum</i>                          | Lawn             | 3                 | 12                    | 3                                   | 1, 30       |
| <i>S. cuspidatum</i>                        | Hollow           | 1                 | 5                     | 5                                   | 10, 50      |
| <i>S. fallax</i>                            | Lawn             | 1                 | 4                     | 1                                   | 1, 1        |
| <i>S. fuscum</i>                            | Hummock          | 9                 | 32                    | 13                                  | 1, 50       |
| <i>S. lindbergii</i>                        | Lawn             | 1                 | 2                     | 0                                   |             |
| <i>S. magellanicum aggr.</i>                | Hummock          | 3                 | 7                     | 5                                   | 1, 50       |
| <i>S. majus</i>                             | Hollow           | 1                 | 2                     | 2                                   | 10, 30      |
| <i>S. papillosum</i>                        | Lawn             | 2                 | 6                     | 1                                   | 0, 1        |
| <i>S. rubellum</i>                          | Hummock          | 1                 | 2                     | 2                                   | 10, 30      |
| <i>S. russowii</i>                          | Hummock          | 1                 | 3                     | 2                                   | 1, 1        |
| <i>S. russowii</i> and <i>capillifolium</i> |                  | 1                 | 18                    | 0                                   | 5, 5        |
| <i>S. squarrosum</i>                        | Lawn             | 1                 | 2                     | 0                                   | 0, 0        |
| <i>S. teres</i>                             | Lawn             | 1                 | 1                     | 1                                   | 2, 2        |

21. **Q:** Line 105: What were the criteria for including these studies in your work? Is this an exhaustive list? It's not clear in which part of the study did you include the papers with water table depth data and in which part did you include the rest of the studies. How and for what purpose did you test one set of k<sub>0</sub> against the other set?

**A:** We hope that our reply to comment 4 of reviewer 3 addresses this issue. The list of studies provided is an exhaustive list.

22. **Q:** Line 109: when you speak of “module”, is this a part of the HPM? If so, elaborate on the model and its so-called modules.

**A:** We hope that our reply to comment 4 of reviewer 3 addresses this issue.

23. **Q:** Line 128: what does PFT stand for?

**A:** We thank the reviewer for catching this error. We suggest to remove the abbreviation from the subsection title and introduce the abbreviation in ll. 109 to 111. (old version of the manuscript) The changed sentence is:

“To predict decomposition rates, the HPM decomposition module needs as inputs the litter type in terms of the HPM plant functional types (PFT), the fraction of mass already lost due to previous decomposition, the depth of the litter below the peat surface, the water table depth, and the peat degree of saturation (Frolking et al., 2010).”

24. **Q:** Line 136: can you elaborate on the criteria of species classification? How was this criterion decided upon?

**A:** We are not sure whether we understand this question correctly. We think the reviewer means assignment to PFT when they refer to “species classification” (and not taxonomic classification), however we think that this section describes in detail the criteria by which we assigned species to PFT and ll. 128 to 132 mention how these criteria are based on the WTD niches the HPM assumes for the PFT.

25. **Q:** Line 140: hummock species decompose slowly, I suppose? If assumptions like this are made, they need to be stated clearly and with citations to back them up.

**A:** Yes, this is a common assumption. We suggest to change this part of the text from “Litterbag data from Prevost et al. (1997) are incubations of peat samples where the species is unknown. Based on descriptions in the paper, it is likely that the peat was formed by hummock species. In addition, decomposition rate estimates for these samples are small. For these reasons, we assigned these samples to the hummock PFT of the HPM.”

to

“Litterbag data from Prevost et al. (1997) are incubations of peat samples where the species is unknown. Based on descriptions in this study, it is likely that the peat was formed by hummock species. Hummock species are assumed to have the smallest decomposition rate among the three *Sphagnum* PFT in the HPM (Frolking et al., 2010) and this is in line with small decomposition rate estimates for these samples (Teickner

et al., 2024). For these reasons, we assigned these samples to the hummock PFT of the HPM.”

26. **Q:** Line 145: here you bring up for the first time the names of two models, but you have not introduced them yet in the text. Maybe consider describing the models first.

**A:** We think that it would not improve the clarity of the text if we would already here introduce the different model versions because some of these were only computed because of data gaps that are described in the previous subsections. To avoid confusion, we suggest to refer to the subsection where the models are described. The sentence then is:

“We therefore estimated  $k_{0,i}$  for individual *Sphagnum* species in models HPM-all, HPM-leaching, and HPM-outlier (see section 2.3.1) and evaluated the variability of these species-specific estimates compared to the standard  $k_{0,i}$  values of the HPM *Sphagnum* PFT.”

27. **Q:** Line 147: Describe the Granberg model’s formula and parameters.

**A:** We suggest to change this subsection to:

“We estimated the degree of saturation with the modified Granberg model (ModGberg model) (Granberg et al., 1999; Kettridge and Baird, 2007) from minimum water content at the surface ( $\theta_{0,\min}$ ), total porosity ( $P$ ), the water table depth ( $z_{\text{wt}}$ ), and the depth of the litterbags below the peat surface during the incubation ( $z$ ):

$$\theta(z) = \min \left( P, \theta_0 + (P - \theta_0) \left( \frac{z}{z_{\text{wt}}} \right)^2 \right) \quad (1)$$

$$\theta_0 = \max \left( \theta_{0,\min}, 0.15z_{\text{wt}}^{-0.28} \right),$$

where  $\theta_0$  is the water content at the surface and  $0.15z_{\text{wt}}^{-0.28}$  is an empirical relation for  $\theta_0$  in dependency of the WTD estimated in Kettridge and Baird (2007).

The minimum water content at the surface was not reported in any study and we therefore assumed a minimum water content at the surface of  $0.05 L_{\text{water}} L_{\text{sample}}^{-1}$  with a standard deviation of  $0.05 L_{\text{sample}}^{-1}$ , based on measurements from Hayward and Clymo (1982). The total porosity was not reported in any study and therefore we assumed an average value of 80% with a standard deviation of 10%, roughly based on values reported for low-density *Sphagnum* peat (Liu and Lennartz, 2019). An improved test of the HPM decomposition module would require litterbag experiments with direct measurements of the degree of saturation at sufficient temporal resolution.”

28. **Q:** Line 163 and 168: what is the “decomposition model” here if not the HPM module?

**A:** We hope that our reply to comment 4 of reviewer 3 addresses this issue.

29. **Q:** Line 210: decomposition rates predicted by HPM correspond to each version of the HPM model or just the standard one? And how exactly were the rates estimated from the litterbag data if not from the HPM model?

**A:** We hope that our reply to comment 4 of reviewer 3 addresses this issue. In addition, we completely re-wrote this part of the text. Please see the attached manuscript with the suggested changes.

30. **Q:** Line 211: Shouldn't a high probability indicate a misfit? If the difference is not significantly different from 0, then doesn't it mean that the HPM predicts well decomposition rates from the litterbag data?

**A:** We thank the reviewer for reporting this error. We suggest to correct it as suggested. However, if the difference is not significantly different from 0, this does not imply that the HPM predicts well decomposition rates from the litterbag data because non-significance may also be caused by large errors in estimates. Non-significance then indicates that the test did not have sufficient capacity to detect a difference. What is a "large error in estimates" depends on what one considers as relevant difference and this will depend on the purpose of an analysis.

31. **Q:** Line 230: In the supplementary information S3 you mention R was used, but in this section, you only mention Stan. Please, give a detailed description of the software used, including which methods were done with each software.

Line 239: For disclosure, I am familiar with Bayesian Methods, but not with cross-validation and power-scaling.

**A:** Stan is a probabilistic programming language. All models were coded in Stan and estimated with R via the R interface to Stan (rstan) package. To clarify this, we suggest to change the sentence starting in l. 232 to:

"Bayesian computations were performed using Markov Chain Monte Carlo (MCMC) sampling with Stan (2.32.2) (Stan Development Team, 2021b) in R (4.2.0) (R Core Team, 2022) via the rstan package (2.32.5) (Stan Development Team, 2021a) ..."

#### 1.2.4 Results

32. **Q:** Figure 1: What type of error is used in this figure? Also, shouldn't the values predicted from litterbag data always be the same?

**A:** We hope that our reply to comment 4 of reviewer 3 addresses this issue. In particular,  $k_0$  estimated from the litterbag data with the different models are different because the HPM decomposition module acts as prior for the  $k_0$  estimates for litterbag experiments with reported WTD (Fig. 1, this reply document). Since this HPM decomposition module (or its inputs) are different between the models, the  $k_0$  estimates can be different, too.

We suggest to add to the caption of Fig. 1 to 3 (Fig. 2 in the new version):

"Points represent average estimates and error bars 95% posterior intervals."

33. **Q:** Line 252: You say that all  $k$  were underestimated for this species but in the Figure the points not predicted with HPM are present only in one of the graphs. Why is that?

**A:** The points predicted with the litterbag prediction model are also shown for the other panels, but not visible due to overlap. Moreover, the referenced paragraph refers only to HPMf, not to all model versions.

Please note that we suggest to completely re-write the Results section and that we suggest to replace the old Fig. 2 by two new figures that more appropriately illustrate the differences between HPM-standard and LDM-standard on the one hand and between HPM-standard and the modifications of the HPM decomposition module on the other hand. Please see section 3.4 in the attached version of the manuscript with the suggested changes.

34. **Q:** Line 263: why is it incompatible?

**A:** The referenced sentence is: “In combination with the improved fit of HPMf-LE-peat, this indicates that uncertainties in the litterbag data are large enough to make the HPM decomposition module compatible with the litterbag decomposition rates by varying the magnitude of decomposition rates and initial leaching losses, even though the standard HPM decomposition module parameters are not necessarily (most) compatible with the data.”

Thus, we do not state that the parameter values indeed are compatible. The reason why we state that these parameter values are not necessarily (most) compatible with the data is that when  $k_0$  and  $l_0$  are estimated without using the HPM decomposition module as prior (HPMf), these estimates are different and they are again different when we also estimate the HPM decomposition parameters from the litterbag data (HPMe-LE-peat- $l_0$ ). Moreover, we also estimated the parameters of the HPM decomposition module from the litterbag data and found that the estimates differ from the standard values. This indicates some incompatibility between the litterbag data and the standard parameter values of the HPM decomposition module.

We suggest to completely re-write the Results section and this sentence will then be removed. Please see the attached manuscript with the suggested changes.

35. **Q:** Figure 2: Why are the values for the  $k$  not predicted from HPM different in every frame? Shouldn't they be constant for each species and have only the values from the HPM vary with each model version? Also, what do negative and positive values of water table depth mean if they are relative to the litterbag?

**A:** We think this misunderstanding is caused because we did not appropriately describe our modeling approach. We hope that our new Fig. 1 and our reply to comment 4 of reviewer 3 address this comment.

Specifically, decomposition rate estimates from the litterbag decomposition model are different for each HPM decomposition module version because these different HPM decomposition module versions were used as prior for  $k_0$  estimated by the litterbag decomposition model. Thus, since the priors are different, so are the estimates.

To avoid confusions, we suggest a complete re-write of the Methods and Results sections that hopefully better describes the differences between HPM-standard and LDM-standard on the one hand and between HPM-standard and the modifications of the HPM decomposition module on the other hand. We also suggest to replace Fig. 2 by two new figures (Fig. 4 and 5 in the new version of the manuscript) to avoid such

misunderstanding.

The x-axis in Fig. 2 (in the old version of the manuscript) is the depth of the water table below the litterbag. Negative values occur whenever the litterbag was buried below the average annual WTD (as estimated from the information given in the studies). Thus, for some studies some litterbags were buried more than 25 cm below the average annual WTD. We suggest to replace Fig. 2 by two new figures and suggest to describe in detail in the caption what the x-axis values mean. Please see section 3.4 in the attached version of the manuscript with the suggested changes in the Results section.

36. **Q:** Figure 3: How do the data points in the litterbag model vs HPMf plots exactly show a linear relationship? From this it does not seem that the more complex models make better predictions. Also, what is the meaning of the “-“ in “(mass-%)”?

**A:** In HPMf, the HPM decomposition module is not used as prior for  $k_0$  estimated by the litterbag decomposition model. Therefore, the litterbag decomposition model in HPMf is the same as the litterbag decomposition model without the HPM decomposition module.

We think the figure is more confusing than helpful. We therefore suggest to remove it and replace it by a more clear description of the results in section 3.1 and 3.2 (in the attached version of the manuscript with the suggested changes).

the “-“ in “(mass-%)” is just part of the unit, which is the fraction of initial mass lost (multiplied by 100). In German you would write it with a “-“, but perhaps not in English. We suggest to remove the “-“ here and elsewhere.

37. **Q:** Line 274: But in Fig. 3 you see that the best predictions are achieved with the HPMf version?

**A:** We hope that our reply to comment 36 addresses this issue.

38. **Q:** Line 278: this is not quite visible in Fig. 2.

**A:** The referenced sentence is: “HPMe-LE-peat-l0 estimates a larger average maximum possible decomposition rate, particularly for *S. angustifolium*, than the other models (Fig. 2 and supporting Fig. S9).”

We agree that this is difficult to see from Fig. 2. We suggest a complete re-write of the Results section, including Fig. 2. In particular, we split Fig. 2 into two figures (new Fig. 4 and Fig. 5) and Fig. 5 (also shown below) now shows the difference of  $k_0$  predicted by the other model versions on the one hand and  $k_0$  predicted by HPM-standard on the other hand. We hope that this figure better shows that  $k_0$  predicted by HPM-leaching (previously HPMe-LE-peat-l0) for *S. angustifolium* is larger on average than for the other models. The difference in  $k_0$  estimates is now described in section 3.2 (Please see the attached manuscript with the suggested changes).

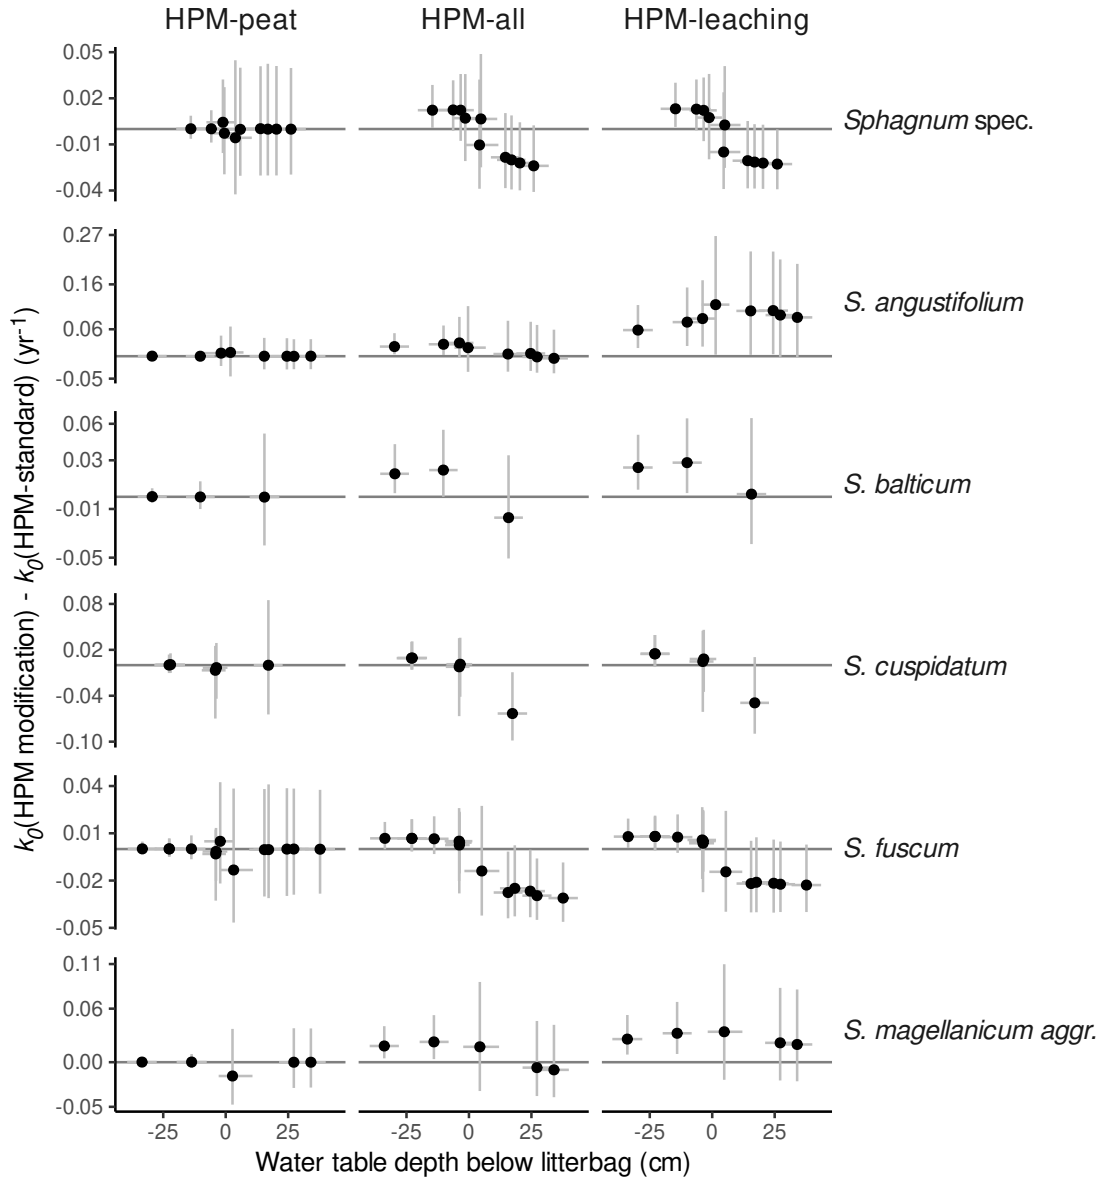

Figure 2:  $k_0$  predicted by HPM decomposition module modifications (either HPM-peat, HPM-all, or HPM-leaching) minus  $k_0$  predicted by the HPM decomposition module with standard parameter values (HPM-standard) versus estimated average water table depths below the litterbags. Points represent average estimates and error bars 95% posterior intervals. *Sphagnum spec.* are samples which that been identified only to the genus level. Only data for species with at least three replicates are shown.



39. **Q:** Line 280: none of the results discussed in this paragraph are shown in Fig. 2 or S3.

**A:** The paragraph is: “In contrast to estimates for  $k_0$ ,  $l_0$ , and  $k_{i,0}$ , the other HPM decomposition module parameters had similar estimates for HPMe-LE-peat and HPMe-LE-peat-10 and as a consequence relative differences of decomposition rates along the water table depth gradient are very similar between all models (Fig. 2). Estimates for  $f_{min}$  did not differ much to the prior value and the power-scaling sensitivity analysis indicates a weak influence of the data (supporting information S3) and therefore that available litterbag data provide only little information about minimum decomposition rates under anoxic conditions.”

We state that “relative differences of decomposition rates along the water table depth gradient are very similar between all models (Fig. 2)”. Fig. 2 shows  $k_0$  (“Predicted with HPM? = No”, see equation (8) in the new version of the manuscript) and  $\mu_k$  estimates (“Predicted with HPM? = Yes”, equation (5) in the new version of the manuscript) for the different models versus WTD relative to the litterbags and therefore allows to compare “relative differences of decomposition rates along the water table depth gradient”. We agree that Fig. 2 is not be the best way to illustrate our results and we therefore suggest to replace it by two new figures, Fig. 4 and Fig. 5 (See our reply to comment 38 of reviewer 3 and the attached manuscript with the suggested changes).

We also state that “Estimates for  $f_{min}$  did not differ much to the prior value and the power-scaling sensitivity analysis indicates a weak influence of the data (supporting information S3)”. It is true that supporting information S3 does not provide additional results to justify this statement, but it describes the power scaling analysis and this is all we wanted to reference here.

We hope that the new Results sections (sections 3.3 and 3.4 in the attached manuscript with the suggested changes) avoids misunderstandings. If the reviewer still thinks that some of the results are prestend incompletely, we would be thankful for further comments.

40. **Q:** Figure 4: it is not possible to differentiate between the species in panel a. Use different colors. Remind the reader in the figure caption what are the other HPM parameters. Apply the same recommendations for the equivalent figures in the Supplementary material, since they are similar.

**A:** We agree that Fig. 4 (a) is cluttered, but we do neither think that colors are useful here, nor that it is impossible to roughly differentiate the species, and we think that all the figure should show is a rough indication of the variation in  $k_{0,i}$  estimates for individual species relative to the HPM standard values for the corresponding PFT. If a reader wants more information, they can access them from the ‘hpmpredict’ R package (Teickner and Knorr, 2024a).

We do not think that colors are useful because there are lines that link each species name to the average value of the marginal posterior distribution shown in the plot and this gives a rough indication of the average  $k_{0,i}$  for each species. We do not expect that a reader wants to read off this graph more than this rough information. If more detailed information are of interest, these can be derived from the published data and code. In particular, species-specific values for  $k_{0,i}$  are also available through the ‘hp-

mdpredict' R package (Teickner and Knorr, 2024a).

To remind readers what the other HPM parameters are, we suggest to include a reference to Tab. 1 in the caption (and to add similar information to the corresponding supporting figures). In addition, we suggest to switch panels (a) and (b):

“Marginal posterior distributions of HPM decomposition module parameters (see Tab. 1). (a) Marginal posterior distributions for  $c_1$ ,  $W_{opt}$ ,  $f_{min}$ , and  $c_2$ . (b) Marginal posterior distributions for  $k_{0,i}$  (maximum possible decomposition rate for species  $i$ ). Species were assigned to HPM microhabitats as described in section 2.2.2. Vertical black lines are the standard parameter values from Frolking et al. (2010). *Sphagnum* spec. are samples that have been identified only to the genus level.”

41. **Q:** Line 299: Could this be because the standard value is an average for all hummock species?

**A:** The referenced sentence is: “Both models also estimate a large posterior probability (> 95%) that *S. russowii* and *S. rubellum* have a larger, and that *S. cuspidatum* has a smaller maximum possible decomposition rate ( $k_{0,i}$ ) than the standard values for the respective PFT (Fig. 4 and supporting Fig. S11).”

We agree that one standard value for all hummock species may not appropriately represent the variability in  $k_{0,i}$  when estimated from litterbag data and we suggest to discuss this in sections 4.1 and 4.4 of the new manuscript (Please see the attached manuscript with the suggested changes) (in the old version, this was discussed in section 4.6).

42. **Q:** Line 302: Please, rephrase this, it's not clear what you mean.

**A:** We thank the reviewer for this suggestion. We suggest to change the sentence from “However, because of the larger variability of  $k_{0,i}$  in the cross-validation (compare with the previous subsection), this discrepancy is probably more uncertain when new data would become available.”

to

“However, estimates for  $k_{0,i}$  were very variable for the same species when different subsets of the litterbag data were used to estimate the model in the cross-validation. This indicates that samples of the same species from different studies have a large variability in  $k_{0,i}$  values.”

43. **Q:** Figures 5, 6 and 7 are not mentioned in the results section whatsoever. The results therein should be described and discussed just as with the rest of the figures and tables.

**A:** It is true that Fig. 5, 6 and 7 have not been mentioned in the Results section. We agree that it makes sense to re-write the Results and Discussion sections. We suggest to include Fig. 5, Fig. 6 and part of the Discussion section relevant here in the new sections 3.4 and 3.5. (Please see the attached manuscript with the suggested changes). Fig. 7 has a specific purpose in our discussion, namely to visualize that the model suggests largest decomposition rates shortly above the annual average WTD, as has been observed in previous studies. It therefore illustrates a comparison of our

model with previous studies and should, in our opinion, be part of the Discussion section, since otherwise it would be disconnected from the part of the text where it is referenced.

### 1.2.5 Discussion

44. **Q:** Line 314: I would not say this is a result of your study. This is maybe a consequence of the results in the study. How would you describe these litterbag experiments that allow to estimate initial leaching losses more accurately?

**A:** The referenced sentence is: “Therefore, an important result of our study is that stronger tests of the HPM decomposition module and other peatland models require litterbag experiments that allow to estimate initial leaching losses more accurately than is possible with available experiments.”

We suggest a complete re-write of the Discussion section and suggest to remove this part as a consequence. Limitations of our study are now discussed in section 4.4. The first part of the Discussion section would mention this aspect only briefly. Please see the attached manuscript with the suggested changes.

45. **Q:** Line 320: is the steep gradient in decomposition rates really a sign of bad model fit or could it be just that decomposition changes with environmental factors such as water table depth?

**A:** The referenced paragraph is: “In the following sections, we discuss these discrepancies. In particular, we show that they imply a less steep gradient of decomposition rates from oxic to anoxic conditions than assumed by the standard HPM decomposition module. We discuss how reliable this pattern is, considering that the data are from heterogeneous studies, what processes may cause the less steep gradient, and how important the suggested differences in parameter values are for the predicted C accumulation.”

In this paragraph, we do not state that “the steep gradient in decomposition rates really [is] a sign of bad model fit”. More specifically, in the mentioned subsections of our manuscript, we analyze how reliable the discrepancies are that we identified (section 4.3) and clearly state that (ll. 376 to 378) further litterbag experiments need to test how reliable the discrepancies are.

Regarding “or could it be just that decomposition changes with environmental factors such as water table depth?”: Yes, and the HPM decomposition module is supposed to accurately describe this gradient. If it does not, either the HPM decomposition module or the litterbag experiments need to be improved and this is what we intended to discuss in sections 4.3, 4.4, and 5.

We suggest to re-write the Results and Discussion sections to hopefully avoid misunderstandings. In particular, the predicted gradient in decomposition rates is now described in the Results section (new section 3.4). We also hope that our new Discussion section makes clear that what we identify is a discrepancy that needs further experiments to rule out confounding factors also on the experimental side.

46. **Q:** Line 349: This should be in the Results section.
- A:** As mentioned in our reply to comment 43 of reviewer 3, we moved this part to the Results section (see section 3.5 in the attached manuscript with the suggested changes).
47. **Q:** Lines 384-391: This should be in the Results section.
- A:** As mentioned in our reply to comment 43 of reviewer 3, we think that we can better present our argument by illustrating it with additional simple applications of the model in the discussion section and we think that it would be more confusing to add this paragraph to the Results section. This paragraph is tightly linked to the argument we make here.
48. **Q:** Line 433: Since you're making inferences based on another paper (Quillet et al., 2013a), please give more details about this study.
- A:** This is a good idea. We suggest to change the sentence in l. 429 from  
 "Previous sensitivity analyses identified  $c_2$  as influential for C accumulation in the HPM (Quillet et al., 2013a, b)."  
 to  
 "Previous global and local sensitivity analyses, where HPM parameter values were varied in broad ranges and environmental conditions were varied, identified  $c_2$  as influential for C accumulation in the HPM (Quillet et al., 2013a, b)."
49. **Q:** Line 438: I don't understand how larger anaerobic decomposition may result in higher water table levels.
- A:** Larger anaerobic decomposition may result in higher water table levels because long-term decomposition of peat reduces the thickness of the peatland which lets the water table increase relative to the peat surface (unless the weather becomes so dry that this effect is compensated by net water losses).  
 We currently think that the interested reader can look up details in (Quillet et al., 2013a), but if the reviewer thinks this is critical information, we would be grateful for further comments.
50. **Q:** Line 482: I believe this is the first time you have brought up the leaching argument in the Discussion, but somehow leaching is mentioned in the title as a central result. The focus of the manuscript is not on leaching at this moment, but most of the attention is on  $c_2$  and Wopt. I suggest changing the title accordingly.
- A:** We agree with the reviewer and hope that our reply to comments 3 and 5 of reviewer 3 address this issue.
51. **Q:** Line 483: Fig. 2 does not show clearly that the estimates of  $k$  are larger in the HPM-LE-peat-10 as you suggest. If anything, they look similar or even lower.
- A:** We agree with the reviewer that this is not clearly visible from Fig. 2 and we also agree (based on supporting Fig. S9) that  $k_{0,i}$  estimates are not systematically

larger for HPMe-LE-peat-l0. However, our results support that errors in  $k_{0,i}$  can be decreased with more accurate estimates for  $k_0$ . We therefore suggest to remove the paragraph starting in l. 479 (in fact, we suggest to completely remove section 4.6 and integrate it into the other Discussion section and add a new section 4.4, where we discuss limitations and ways to improve our test). Please see the attached manuscript with the suggested changes. We thank the reviewer for bringing this issue to our attention.

52. **Q:** Line 484: How do you suggest better estimates of leaching losses can be achieved in future experiments?

**A:** The answer to this question is addressed in our other manuscript (Teickner et al., 2024) and therefore outside the scope of this study. In brief what we found in this other study, based on a sensitivity analysis of the litterbag decomposition model, is that litterbag experiments should sample one batch of litterbags shortly (few days to weeks) after the start of the experiment. We now suggest to summarize limitations of our test and suggested improvements in section 4.4. Please see the attached manuscript with the suggested changes.

### 1.2.6 Supporting information

53. **Q:** S1: Most of the variables and parameters in this section are not defined. I suggest presenting this section in table form with 3 columns, where one of the columns has human-friendly names for each variable/parameter/model. Making the reader go read three other papers to understand the formulas is not very mindful.

**A:** We thank the reviewer for this suggestion. We suggest to remove supporting section S1 since the listed equations would now be included in the main text. The prior distributions where this is not the case are also listed in supporting information S2 (now supporting information S1). We also suggest to expand this table by including more friendly parameter names for key parameters (the same names now also used in the equations in the main text) and by adding a column that references the equation where the parameter occurs. This table would look as follows:

Table 2: Prior distributions of all Bayesian models and their justifications. “Parameter name in code” is the name for the parameter as used in our Stan models. “Parameter name in text” is the name of the corresponding parameter we use in the main text and figures. “Equation in main text” reerences the equation in the main text where the parameter occurs. When there is no value for “Justification”, the prior was chosen based on prior predictive checks against the data. This prior predictive check tests whether the models can produce distributions of measured variables we expect based on prior knowledge. The results of these prior predictive checks are shown in supporting section S3.

| Parameter name in code                          | Parameter name in text                           | Equation in main text | Unit                                                                                 | Prior distribution              | Justification                                                                                                                                              |
|-------------------------------------------------|--------------------------------------------------|-----------------------|--------------------------------------------------------------------------------------|---------------------------------|------------------------------------------------------------------------------------------------------------------------------------------------------------|
| l_2_p1                                          |                                                  |                       | $(g \xi_{\text{initial}}^{-1})$ (logit scale)                                        | normal(-3.5, 1_2_p1_p2)         | Assumes an average initial leaching loss across all available litterbag data within (95% confidence interval) $(0.012, 0.068) g \xi_{\text{initial}}^{-1}$ |
| l_2_p2                                          |                                                  |                       | $(g \xi_{\text{initial}}^{-1})$ (logit scale)                                        | normal(0, 1_2_p2_p2)            |                                                                                                                                                            |
| l_2_p3                                          |                                                  |                       | $(g \xi_{\text{initial}}^{-1})$ (logit scale)                                        | normal(0, 1_2_p3_p2)            |                                                                                                                                                            |
| l_2_p4                                          |                                                  |                       | $(g \xi_{\text{initial}}^{-1})$ (logit scale)                                        | normal(0, 1_2_p4_p2)            |                                                                                                                                                            |
| k_2_p1                                          | $\beta_{k,1}$                                    | 4                     | $(\text{yr}^{-1})$ (log scale)                                                       | normal(-2.9, k_2_p1_p2)         | Assumes an average initial decomposition rate across all available litterbag data within (95% confidence interval) $(0.024, 0.131) \text{yr}^{-1}$         |
| k_2_p2                                          | $\beta_{k,2,\text{species}}$                     | 4                     | $(\text{yr}^{-1})$ (log scale)                                                       | normal(0, k_2_p2_p2)            | Centered at the standard value used in the HPM.                                                                                                            |
| k_2_p3                                          | $\beta_{k,3,\text{species} \times \text{study}}$ | 4                     | $(\text{yr}^{-1})$ (log scale)                                                       | normal(0, k_2_p3_p2)            | Centered at the standard value used in the HPM.                                                                                                            |
| k_2_p4                                          | $\beta_{k,4,\text{sample}}$                      | 4                     | $(\text{yr}^{-1})$ (log scale)                                                       | normal(0, k_2_p4_p2)            | Centered at the standard value used in the HPM.                                                                                                            |
| phi_2_p2_p1                                     |                                                  |                       | (-) (log scale)                                                                      | normal(5, phi_2_p2_p1_p2)       |                                                                                                                                                            |
| phi_2_p2_p2                                     |                                                  |                       | (-) (log scale)                                                                      | normal(0, phi_2_p2_p2_p2)       |                                                                                                                                                            |
| phi_2_p2_p3                                     |                                                  |                       | (-) (log scale)                                                                      | normal(0, phi_2_p2_p3_p2)       |                                                                                                                                                            |
| phi_2_p2_p4                                     |                                                  |                       | (-) (log scale)                                                                      | normal(0, phi_2_p2_p4_p2)       |                                                                                                                                                            |
| alpha_2_p1                                      |                                                  |                       | (-) (log scale)                                                                      | normal(-0.2, 0.3)               | Assumes an average $\alpha$ across all available litterbag data within (95% confidence interval) $(1.451, 2.473)$                                          |
| alpha_2_p2                                      |                                                  |                       | (-) (log scale)                                                                      | normal(0, 0.3)                  |                                                                                                                                                            |
| alpha_2_p3                                      |                                                  |                       | (-) (log scale)                                                                      | normal(0, 0.3)                  |                                                                                                                                                            |
| alpha_2_p4                                      |                                                  |                       | (-) (log scale)                                                                      | normal(0, 0.2)                  |                                                                                                                                                            |
| k_2_p1_p2                                       |                                                  |                       | $(\text{yr}^{-1})$ (log scale)                                                       | half-normal(0, 0.4)             |                                                                                                                                                            |
| k_2_p2_p2                                       |                                                  |                       | $(\text{yr}^{-1})$ (log scale)                                                       | half-normal(0, 0.4)             |                                                                                                                                                            |
| k_2_p3_p2                                       |                                                  |                       | $(\text{yr}^{-1})$ (log scale)                                                       | half-normal(0, 0.4)             |                                                                                                                                                            |
| k_2_p4_p2                                       |                                                  |                       | $(\text{yr}^{-1})$ (log scale)                                                       | half-normal(0, 0.4)             |                                                                                                                                                            |
| phi_2_p2_p1_p2                                  |                                                  |                       | (-) (log scale)                                                                      | half-normal(0, 0.3)             |                                                                                                                                                            |
| phi_2_p2_p2_p2                                  |                                                  |                       | (-) (log scale)                                                                      | half-normal(0, 0.3)             |                                                                                                                                                            |
| phi_2_p2_p3_p2                                  |                                                  |                       | (-) (log scale)                                                                      | half-normal(0, 0.3)             |                                                                                                                                                            |
| phi_2_p2_p4_p2                                  |                                                  |                       | (-) (log scale)                                                                      | half-normal(0, 0.3)             |                                                                                                                                                            |
| l_2_p1_p2                                       |                                                  |                       | $(g \xi_{\text{initial}}^{-1})$ (logit scale)                                        | half-normal(0, 0.4)             |                                                                                                                                                            |
| l_2_p2_p2                                       |                                                  |                       | $(g \xi_{\text{initial}}^{-1})$ (logit scale)                                        | half-normal(0, 0.4)             |                                                                                                                                                            |
| l_2_p3_p2                                       |                                                  |                       | $(g \xi_{\text{initial}}^{-1})$ (logit scale)                                        | half-normal(0, 0.4)             |                                                                                                                                                            |
| l_2_p4_p2                                       |                                                  |                       | $(g \xi_{\text{initial}}^{-1})$ (logit scale)                                        | half-normal(0, 0.4)             |                                                                                                                                                            |
| layer_total_porosity_1                          | $P$                                              | 9                     | $L_{\text{pores}} L_{\text{sample}}^{-1}$                                            | beta(12, 3)                     | Centered at the standard value used in the HPM.                                                                                                            |
| layer_minimum_degree_of_saturation_at_surface_1 | $\theta_{0,\text{min}}$                          | 9                     | $L_{\text{water}} L_{\text{pores}}^{-1}$                                             | beta(0.9, 17.1)                 | Centered at the standard value used in the HPM.                                                                                                            |
| layer_water_table_depth_to_surface_1            |                                                  |                       | cm                                                                                   | normal(average reported WTD, 3) | The average was set to the average water table depths reported in the litterbag studies.                                                                   |
| hpm_k_2_p1                                      | $\alpha_{\mu_k}$                                 | 8                     | (-)                                                                                  | gamma(20, 1)                    | Centered at the standard value used in the HPM.                                                                                                            |
| m69_p1                                          | $W_{\text{opt}}$                                 | 6                     | $L_{\text{water}} L_{\text{pores}}^{-1}$                                             | beta(13.5, 16.5)                | Centered at the standard value used in the HPM.                                                                                                            |
| m69_p2                                          | $c_1$                                            | 6                     | (-)                                                                                  | gamma(20, 8.66)                 | Centered at the standard value used in the HPM.                                                                                                            |
| m68_p1                                          | $f_{\text{min}}$                                 | 7                     | $(\text{yr}^{-1})$                                                                   | gamma(5, 5000)                  | Centered at the standard value used in the HPM.                                                                                                            |
| m68_p2                                          | $c_2$                                            | 7                     | (cm)                                                                                 | gamma(5, 16.67)                 | Centered at the standard value used in the HPM.                                                                                                            |
| m68_p3_2_p1                                     | $k_{0,i}$                                        | 5                     | $(\text{yr}^{-1})$ (log scale)                                                       | normal(-2.2, 0.3)               | Assumes a maximum potential initial decomposition rate across all species within (95% confidence interval) $(0.061, 0.2) \text{yr}^{-1}$                   |
| hpm_1_2_p1                                      | $\beta_{l,1}$                                    | 10                    | $(g \xi_{\text{initial}}^{-1})$ (logit scale)                                        | normal(-2.2, 0.3)               | Centered at the standard value used in the HPM.                                                                                                            |
| hpm_1_2_p3                                      | $\beta_{l,2}$                                    | 10                    | $(g \xi_{\text{initial}}^{-1} L_{\text{water}} L_{\text{pores}}^{-1})$ (logit scale) | normal(0, 0.5)                  | Centered at the standard value used in the HPM.                                                                                                            |
| hpm_1_2_p4                                      | $\phi_l$                                         | 10                    | (-)                                                                                  | gamma(10, 0.25)                 | Centered at the standard value used in the HPM.                                                                                                            |

54. **Q:** S2: same as S1. Also, S2 does not seem to be referenced in the main manuscript, but if it’s relevant to the manuscript, it should be mentioned.

**A:** It is true that supporting information S2 is not mentioned in the main text, but its content, supporting Tab. S1 is referenced in l. 238 (new: l. 307 and l. 375).

55. **Q:** S3: when you say “all other computations were done in R”, which ones weren’t? Please, detail all the software used in this study.

**A:** All used software is listed. We suggest to remove “other” to make clear that all computations were made in R. Please also see our reply to comment 31 of reviewer 3.

56. **Q:** S4: This section does not seem to be referenced in the main manuscript nor do the individual figures in it, but if this is relevant to the manuscript, it should be mentioned.

**A:** We thank the reviewer for this suggestion. We suggest to reference section S4 (new: S3) in the caption of Tab. S1:

“The results of these prior predictive checks are shown in supporting section S3.”

We also suggest to reference section S4 (new: S3) in the main text at l. 238:

“All models used the same priors for the same parameters and prior choices are listed and justified in supporting Tab. S1. Results of prior and posterior predictive checks are shown in supporting information S3.”

57. **Q:** S5: In the caption of Fig. S9 you wrote twice HPMe-LE-peat-l0, but one of them should be HPMe-LE-peat. The axis titles are switched (k should be x axis and Species should be y axis). Also, I suggest separating vertically points corresponding to each model, and for the different depths of Sphagnum spec. as well. This way you will avoid the overlap.

**A:** We thank the reviewer for pointing us to these errors and potentials for improvements. We will correct and include them as suggested.

58. **Q:** S6: I suggest differentiating species with colors in Figs. S10 and S11, and defining what parameters are in the captions of Figs. S10, S11 and S12.

**A:** We hope that our reply to comment 40 by reviewer 3 addresses this issue.

59. **Q:** S7: If I understand correctly, data points on the positive end of the x axis are covered in water? If so, I would expect leaching to be higher under those conditions, but somehow it does not seem like it. I find this interesting, could you discuss this in the main manuscript?

**A:** It is the other way around: positive values indicate that the litterbag was placed above the water table level and negative values mean that they were covered with water. We suggest to include the following note to the captions of Fig. 2 (new: Fig. 4), and supporting Fig. S13 to S15 to clarify this:

“(negative values represent litterbags placed below the water table, positive values represent litterbags placed above the water table in the unsaturated zone)”

As mentioned in the manuscript (l. 286), both positive and negative relations of  $l_0$  to the degree of saturation would be compatible with the data. We had expected, in line with Lind et al. (2022) that  $l_0$  would be larger under more saturated conditions, however other factors may confound this pattern or the  $l_0$  estimates may simply have too large errors to detect such a relation (Teickner et al., 2024) and we therefore do not discuss any patterns in more detail in the main text.

Please note that results on the relation of initial leaching losses to the degree of saturation are now described in section 3.6 and discussed in point 4 of section 4.4.

60. **Q:** S9: Which one of the two panels uses the standard value for  $W_{opt}$  or the  $W_{opt}$  value estimated by HPMe-LE-peat-10?

**A:** We thank the reviewer for pointing out this error: one of the labels was missing. We have corrected the figure.

61. **Q:** S11: You say decomposition was simulated either under a degree of saturation of 0.6 L/L or 20 cm below the water table. But in the figure, you included -20 cm and 10 cm, so please make sure the description coincides with the figure.

**A:** We thank the reviewer for this suggestion. We chose some arbitrary position above the water table and fixed the degree of saturation to 0.6 L/L. We suggest to change the sentence to:

“To illustrate that the HPM decomposition module implies large uncertainties if its parameters are estimated from available litterbag data, we simulate decomposition of *S. fallax* and *S. fuscum* litter during 50 years, either incubated at 10 cm depth under a degree of saturation of  $0.6 \frac{L_{water}}{L_{pores}^{-1}}$ , or 20 cm below the water table.”

62. **Q:** S12: This section does not seem to be referenced in the main manuscript, but if this is relevant to the manuscript, it should be mentioned.

**A:** We thank the reviewer for this suggestion. We suggest to reference section S12 (new: S11) at the end of section 4.4. Please see the attached manuscript with the suggested changes.

### 1.2.7 Technical corrections

63. **Q:** Line 3: separate “conditions and”.

**A:** We will correct this typo as suggested.

64. **Q:** Throughout the text citation style is inconsistent. I suggest not using parentheses for the year if the citation is already in a parenthesis. Use a comma instead, like you have already in many parts of the text. Correct the citations accordingly in lines: 27, 32, 33, 66, 375, 421, 422, 434, 453.

**A:** We thank the reviewer for this suggestion and will change the citations as suggested.

65. **Q:** Line 99: correct “use” for “used”.

**A:** We will change the text as suggested.

66. **Q:** Line 117: add “and” before “water table depths”.

**A:** We will change the text as suggested.

67. **Q:** Line 223: change “form” with “from”.

**A:** We will correct “form” to “from” as suggested.



68. **Q:** Line 328: It should be “as a consequence”.  
**A:** We will change the text as suggested.
69. **Q:** Line 366: after “.” the next letter should be lowercase, otherwise change “.” for “.”.  
**A:** We will change the text as suggested.
70. **Q:** Line 475: I think another word like consider, believe, think, etc. is a better alternative for expect here.  
**A:** We did not find “expect” in l. 475. Does the reviewer mean l. 375?
71. **Q:** Supplementary information S11: change the “,” in S. fallax.  
**A:** We will change the text as suggested.

## 2 Additional changes

1. We suggest a complete re-write of large parts of the manuscript to address the reviewer comments. Specific aspects of this re-write are listed in the comments of the reviewers, others are too numerous for a list of them to be useful without knowing the context of these changes. Please see the attached manuscript with the suggested changes.
2. We suggest to include Quillet et al. (2015) as reference for studies estimating  $c_2$  from peat cores. We suggest the following changes:  
We suggest to change l. 392 to 393 from  
“Larger and smaller  $c_2$  than the standard value have been estimated for several permafrost peatland cores with a modified version of the HPM with monthly time step (Treat et al., 2021, 2022).”  
to  
“Larger and smaller  $c_2$  than the standard value have been estimated for several peatland cores with the HPM and a modified version with monthly time step (Quillet et al., 2015; Treat et al., 2021, 2022).”
3. Frohking et al. (2010) also mention that peat accumulation as predicted by the HPM is sensitive to  $c_2$  and a site-specific parameter. We therefore add Frohking et al. (2010) as reference at l. 47 and 422.
4. In l. 77 we will correct “decmposition” to “decomposition”.

## References

Bengtsson, F., Rydin, H., and Hájek, T.: Biochemical determinants of litter quality in 15 species of *Sphagnum*, *Plant and Soil*, 425, 161–176, <https://doi.org/10.1007/s11104-018-3579-8>, 2018.

Frolking, S., Roulet, N. T., Moore, T. R., Richard, P. J. H., Lavoie, M., and Muller, S. D.: Modeling northern peatland decomposition and peat accumulation, *Ecosystems*, 4, 479–498, <https://doi.org/10.1007/s10021-001-0105-1>, 2001.

Frolking, S., Roulet, N. T., Tuittila, E., Bubier, J. L., Quillet, A., Talbot, J., and Richard, P. J. H.: A new model of Holocene peatland net primary production, decomposition, water balance, and peat accumulation, *Earth System Dynamics*, 1, 1–21, <https://doi.org/10.5194/esd-1-1-2010>, 2010.

Granberg, G., Grip, H., Löfvenius, M. O., Sundh, I., Svensson, B. H., and Nilsson, M.: A simple model for simulation of water content, soil frost, and soil temperatures in boreal mixed mires, *Water Resources Research*, 35, 3771–3782, <https://doi.org/10.1029/1999WR900216>, 1999.

Hayward, P. M. and Clymo, R. S.: Profiles of water content and pore size in *Sphagnum* and peat, and their relation to peat bog ecology, *Proceedings of the Royal Society of London. Series B, Biological Sciences*, 215, 299–325, 1982.

Johnson, M. G., Granath, G., Tahvanainen, T., Pouliot, R., Stenøien, H. K., Rochefort, L., Rydin, H., and Shaw, A. J.: Evolution of niche preference in *Sphagnum* peat mosses, *Evolution*, 69, 90–103, <https://doi.org/10.1111/evo.12547>, 2015.

Kettridge, N. and Baird, A.: In situ measurements of the thermal properties of a northern peatland: Implications for peatland temperature models, *Journal of Geophysical Research: Earth Surface*, 112, <https://doi.org/10.1029/2006JF000655>, 2007.

Lind, L., Harbicht, A., Bergman, E., Edwartz, J., and Eckstein, R. L.: Effects of initial leaching for estimates of mass loss and microbial decomposition—Call for an increased nuance, *Ecology and Evolution*, 12, <https://doi.org/10.1002/ece3.9118>, 2022.

Liu, H. and Lennartz, B.: Hydraulic properties of peat soils along a bulk density gradient—A meta study, *Hydrological Processes*, 33, 101–114, <https://doi.org/10.1002/hyp.13314>, 2019.

Prevost, M., Belleau, P., and Plamondon, A. P.: Substrate conditions in a treed peatland: Responses to drainage, *Écoscience*, 4, 543–554, <https://doi.org/10.1080/11956860.1997.11682434>, 1997.

Quillet, A., Frolking, S., Garneau, M., Talbot, J., and Peng, C.: Assessing the role of parameter interactions in the sensitivity analysis of a model of peatland dynamics, *Ecological Modelling*, 248, 30–40, <https://doi.org/10.1016/j.ecolmodel.2012.08.023>, 2013a.

Quillet, A., Garneau, M., and Frolking, S.: Sobol’ sensitivity analysis of the Holocene Peat Model: What drives carbon accumulation in peatlands?, *Journal of Geophysical Research: Biogeosciences*, 118, 203–214, <https://doi.org/10.1029/2012JG002092>, 2013b.

Quillet, A., Garneau, M., Van Bellen, S., Frolking, S., and Tuittila, E.-S.: Integration of palaeohydrological proxies into a peatland model: A new tool for palaeoecological studies, *Ecohydrology*, 8, 214–229, <https://doi.org/10.1002/eco.1501>, 2015.

R Core Team: R: A language and environment for statistical computing, Manual, R Foundation for Statistical Computing, Vienna, Austria, 2022.

Rydin, H., Jeglum, J. K., and Bennett, K. D.: The biology of peatlands, 2nd ed., Oxford University Press, Oxford, 2013.

Stan Development Team: RStan: The R interface to Stan, 2021a.

Stan Development Team: Stan Modeling Language Users Guide and Reference Manual, 2021b.

Teickner, H. and Knorr, K.-H.: hpmddpredict: Predictions with model HPMe-LE-peat-10

from Teickner et al. (2024), <https://doi.org/10.5281/ZENODO.11339733>, 2024a.

Teickner, H. and Knorr, K.-H.: Peatland Decomposition Database (1.0.0), <https://doi.org/10.5281/ZENODO.11276065>, 2024b.

Teickner, H., Pebesma, E., and Knorr, K.-H.: A synthesis of *Sphagnum* litterbag experiments: Initial leaching losses bias decomposition rate estimates, <https://doi.org/10.5194/egusphere-2024-1686>, 2024.

Treat, C. C., Jones, M. C., Alder, J., Sannel, A. B. K., Camill, P., and Frohking, S.: Predicted vulnerability of carbon in permafrost peatlands with future climate change and permafrost thaw in western Canada, *Journal of Geophysical Research: Biogeosciences*, 126, e2020JG005872, <https://doi.org/10.1029/2020JG005872>, 2021.

Treat, C. C., Jones, M. C., Alder, J., and Frohking, S.: Hydrologic controls on peat permafrost and carbon processes: New insights from past and future modeling, *Frontiers in Environmental Science*, 10, 892925, <https://doi.org/10.3389/fenvs.2022.892925>, 2022.

van Breemen, N.: How *Sphagnum* bogs down other plants, 6, 1995.

Yu, Z., Turetsky, M. R., Campbell, I. D., and Vitt, D. H.: Modelling long-term peatland dynamics. II. Processes and rates as inferred from litter and peat-core data, *Ecological Modelling*, 145, 159–173, [https://doi.org/10.1016/S0304-3800\(01\)00387-8](https://doi.org/10.1016/S0304-3800(01)00387-8), 2001.

# Peat Oxic and Anoxic Controls of *Sphagnum* Decomposition Rates in the Holocene Peatland Model Decomposition Module Estimated from Litterbag Data

Henning Teickner<sup>1,2</sup>, Edzer Pebesma<sup>2</sup>, and Klaus-Holger Knorr<sup>1</sup>

<sup>1</sup>Ecohydrology & Biogeochemistry Group, Institute of Landscape Ecology, University of Münster, 48149, Germany

<sup>2</sup>Spatiotemporal Modelling Lab, Institute for Geoinformatics, University of Münster, 48149, Germany

**Correspondence:** Henning Teickner (henning.teickner@uni-muenster.de)

**Abstract.** The Holocene Peatland Model (HPM) is a widely applied model to understand and predict long-term peat accumulation, but it is difficult to test due to its complexity, measurement errors, and lack of data. Instead of testing the complete model, tests of individual modules may avoid some of these problems. In particular, the HPM decomposition module can be tested with litterbag data, but no such test has been conducted yet.

5 Here, we estimate parameter values of the HPM decomposition module from available *Sphagnum* litterbag experiments included in the Peatland Decomposition Database and with a litterbag decomposition model that considers initial leaching losses. Using either these estimates or the standard parameter values, we test whether the HPM decomposition module fits decomposition rates ( $k_0$ ) in *Sphagnum* litterbag experiments along a gradient from oxic to anoxic conditions.

Both Litterbag data and model versions where HPM decomposition module parameters were estimated suggest a less steep  
10 gradient of decomposition rates from oxic to anoxic conditions and larger anaerobic decomposition rates for several species than the standard parameter values. This discrepancy may be caused by ignoring effects of water table fluctuations on aerobic and anaerobic decomposition rates. Moreover, our analysis suggests that maximum possible decomposition rates of individual species ( $k_{0,i}$ ) vary more than suggested by the standard parameter values of the HPM plant functional types. Based on previous sensitivity analyses of the HPM, the estimated differences to the standard parameter values can cause differences in predicted  
15 5000 year C accumulation up to 100 kg m<sup>-2</sup>.

The HPM decomposition module with standard parameter values fits  $k_0$  estimated from *Sphagnum* litterbag data, but model versions where HPM decomposition module parameters were estimated and differ significantly have an equivalent fit. The reason why models with different parameter values have equivalent fit is that errors in remaining masses and the design of available litterbag experiments support a range of initial leaching loss and  $k_0$  estimates. Consequently, applications of the HPM  
20 and any other peatland model should consider that a broad range of decomposition module parameter values is compatible with available litterbag experiments.

Improved litterbag experiments are needed for more accurate tests of any peatland decomposition module and for obtaining parameter estimates accurate enough to allow even only approximate predictions of long-term peat accumulation. The modeling approach used here can be combined with different data sources (for example measured degree of saturation) and decomposition  
25 modules. In light of the large differences in long-term peat accumulation suggested by the parameter estimates, we conclude

that it is worth to conduct such experiments, not only to improve the decomposition module of the HPM, but to improve peatland models in general.

## 1 Introduction

Decomposition is one of the major controls of how much carbon (C) peatlands can store. Compared to other ecosystems, northern peatlands usually have small decomposition rates because of cold temperatures, high water table levels, acidic pH value, and litter that does not decompose fast even under environmental conditions favorable for decomposition (van Breemen, 1995; Rydin et al., 2013). These slow decomposition rates caused northern peatlands to accumulate at least 400 Gt C (Yu, 2012; Nichols and Peteet, 2019) during the Holocene and changes in the controls of decomposition rates may cause them to loose considerable amounts of C to the atmosphere under climate and land use changes (Frolking et al., 2011; Loisel et al., 2017).

Peatland models are used to better understand past C accumulation and to predict future changes in peat C stocks, but because of the long time scales which have to be considered, they are difficult to test. Past studies have compared site-adapted simulations of peat height, age, C and N stocks, macrofossil composition, and water table level predicted by peatland models against peat core data (e.g., Frolking et al., 2010; Tuittila et al., 2013; Treat et al., 2021; Zhao et al., 2022), and have shown that existing peatland models can reproduce observed patterns to some extent. However, these tests suffer from two problems. First, they cannot reliably identify the parameter values or model equations that cause discrepancies between model predictions and measurements because they test entire peatland models against observed data. Second, there often are large uncertainties on both sides of the test; peatland models have large uncertainties in parameter values and model structure and these may produce a range of predictions as illustrated by uncertainty analyses (e.g., Quillet et al., 2013a, Quillet et al. (2013b)) and model intercomparisons (e.g., Zhao et al., 2022). Observed data also has uncertainty from measurements, peat dating, or simply missing data, for example for past precipitation. Large uncertainties can make tests inconclusive, no matter how much data we use. As a consequence, there remains large and often not quantified uncertainty about parameter values that control decomposition rates.

An alternative that avoids some of these problems is to test only some part of a model while taking into account relevant uncertainty sources. To estimate uncertainties in and test values of parameters that directly control decomposition rates, such a test could address the decomposition module of a peatland model. For example, in the Holocene Peatland Model (HPM) (Frolking et al., 2010), we only need to know litter species, peat degree of saturation, the depth of the litter below the peat surface, water table depth, and only five parameters to predict decomposition rates. The predictions can be compared to decomposition rates estimated from litterbag data and therefore future litterbag studies can directly test whether discrepancies identified in such a test are replicable. Admittedly, such a test is restricted to short time ranges and not representative for long-term decomposition rates which may differ from that of fresh litter (e.g., Frolking et al., 2001), but future tests with different scope and applications of the model will benefit from the reduced parameter uncertainties and can consider where the model fails already on short time scales.

A test of decomposition modules is relevant because of the importance of decomposition for long-term C accumulation in peatlands. Previous sensitivity analyses of the HPM and applications to peat cores suggest that the anoxia scale length ( $c_2$ ), the parameter controlling how anaerobic decomposition rates are limited by electron acceptor depletion and accumulation of decomposition products, can result in a doubling of accumulated C, depending on climate conditions (Frolking et al., 2010; Quillet et al., 2013b; Kurnianto et al., 2015). These sensitivity analyses used assumed parameter ranges that are not informed by litterbag experiments. A test of only the HPM decomposition module can provide better estimates for  $c_2$  and may therefore help to reduce uncertainties in predicted C accumulation rates.

Currently, litterbag experiments are not as extensively used for testing peatland models as they could and only a fraction of the information available from litterbag experiments is used to develop models. The HPM derives initial decomposition rates of moss plant functional types from litterbag data, but parameters for environmental controls of decomposition are assumptions which appear to be informed at most qualitatively by litterbag experiments, and it is not tested whether the HPM decomposition module successfully fits available litterbag data (Frolking et al., 2010). This is also the case for other dynamic peatland models, e.g. Frolking et al. (2001), Bauer (2004), Heijmans et al. (2008), Heinemeyer et al. (2010), Morris et al. (2012), Chaudhary et al. (2018), Bona et al. (2020).

One reason why such tests have been difficult is that suitable litterbag raw data to test peatland models are scarce. Bona et al. (2018) developed a Peatland Productivity and Decomposition Parameter Database, but it contains only data from studies older than 2010 and no error estimates for remaining masses in litterbag data. Since decomposition rates have been estimated with different litterbag decomposition models in previous studies, their values are not directly comparable. Moreover, initial leaching losses (losses of soluble compounds, which do not originate from microbial depolymerization, due to leaching during the first days to weeks of incubation) can bias decomposition rate estimates if they are not explicitly considered and can vary between species and experiments (Yu et al., 2001; Teickner et al., 2024b). Therefore, raw data (remaining masses) are necessary for any meaningful test of decomposition modules with litterbag data. The recently published Peatland Decomposition Database (Teickner and Knorr, 2024b) contains raw data from available *Sphagnum* litterbag experiments and therefore allows to estimate parameters with any mass loss-based decomposition model and therefore also allows to consider initial leaching losses.

Even though tests of only a part of a model are less uncertain than tests of whole models, there still is a risk that they are dominated by uncertainties. Remaining masses in litterbag experiments are often very variable, even under controlled environmental conditions (e.g., Bengtsson et al., 2018), and for many litterbag experiments, a range of decomposition rates may produce similar predictions for remaining masses (e.g., Yu et al., 2001), also if a litterbag decomposition model compatible with the HPM is used (Teickner et al., 2024b). Finally, also only five model parameters, as in the case of the HPM decomposition module, can make predictions uncertain. These uncertainties have to be taken into account to check whether litterbag data are compatible with the peatland model. A possible way to do this is to combine the HPM decomposition module, a litterbag decomposition model compatible with this module, and available litterbag experiments into one model and use Bayesian data analysis (Gelman et al., 2014) to estimate uncertainties of data and parameters.

If such a test suggests that decomposition rates predicted by the HPM decomposition module do not fit estimates from litterbag experiments, or only if parameter estimates of the decomposition module differ from the parameter values originally

suggested, even if main uncertainty sources are considered, the test has identified a discrepancy worth considering in more detail. We can then analyze whether previous sensitivity analyses of the HPM suggest that these discrepancies may have larger effects on the predicted C accumulation, and if this is the case, the discrepancies are worth testing in future litterbag experiments.

Our aim is to test the HPM decomposition module against decomposition rates estimated from available *Sphagnum* litterbag experiments. Specifically, we want to:

1. Test whether the HPM decomposition module can predict litterbag decomposition rates for different *Sphagnum* species along the gradient from oxic to anoxic conditions.
2. Estimate HPM decomposition module parameters from litterbag data and compare them to the originally suggested values (standard parameter values) (Frolking et al., 2010) that are often used when applying the HPM (Tab. 1).
3. If some of the parameter values differ, identify the possible causes why parameter estimates from litterbag data differ to provide guidance for future litterbag experiments.
4. Analyze whether estimated differences in HPM parameter values could imply significant differences in decomposition rates and long-term peat accumulation.

To address these aims, we used the HPM decomposition module to predict decomposition rates in available litterbag experiments and compared these to decomposition rates estimated for the same litterbag experiments with a litterbag decomposition model that considers initial leaching losses (Teickner et al., 2024b) (Fig. 1). These predictions require the peat degree of saturation, which we estimate with the modified Granberg model (Granberg et al., 1999; Kettridge and Baird, 2007) from water table depth data reported in these studies. Furthermore, some *Sphagnum* litterbag experiments do not report water table depths and therefore cannot be used to test the HPM, but they still provide information on initial leaching losses and decomposition rates and therefore help to constrain parameter estimates. We therefore include these data via Bayesian hierarchical modeling in the litterbag decomposition model. In summary, our approach combines the HPM decomposition module, the modified Granberg model, and a *Sphagnum* litterbag decomposition model that allows to consider initial leaching losses and to pool information across litterbag experiments (Teickner et al., 2024b). While this approach has its limitations, it exploits available data as far as possible, while considering known confounders and propagating relevant uncertainties.

We only test the decomposition module of the HPM, but the decomposition modules of many other peatland models are also parameterized based on litterbag experiments and our modeling approach is flexible enough to be combined with other decomposition modules. Therefore, our test could serve as a blueprint for similar tests of other peatland model decomposition modules. Similarly, the parameter discrepancies identified here suggest future litterbag experiments that would provide novel insights into oxic and anoxic controls of *Sphagnum* decomposition rates and our study therefore suggests a strategy to improve decomposition modules in general.

**Table 1.** Standard values of parameters of the decomposition module in the Holocene Peatland Model (Frolking et al., 2010).

| HPM parameter                            | Standard value | Description                                                                                                                                                                                                                                                                                                                                                         |
|------------------------------------------|----------------|---------------------------------------------------------------------------------------------------------------------------------------------------------------------------------------------------------------------------------------------------------------------------------------------------------------------------------------------------------------------|
| $W_{opt}$ ( $L_{water} L_{pores}^{-1}$ ) | 0.450          | Optimum degree of saturation for aerobic decomposition.                                                                                                                                                                                                                                                                                                             |
| $c_1$ (-)                                | 2.310          | Curvature of the relation of the aerobic decomposition rate to the degree of saturation (larger values imply a steeper decrease of decomposition rates for degrees of saturation diverging from $W_{opt}$ ).                                                                                                                                                        |
| $f_{min}$ ( $yr^{-1}$ )                  | 0.001          | Minimum anaerobic decomposition rate.                                                                                                                                                                                                                                                                                                                               |
| $c_2$ (m)                                | 0.300          | Anoxia scale length. Represents limitation of anaerobic decomposition rates with increasing distance below the annual average water table depth due to end product accumulation and limitation of available electron acceptors. Larger values mean that anaerobic decomposition rates decrease less strongly with depth below the average annual water table level. |
| $k_{0,hollow}$ ( $yr^{-1}$ )             | 0.130          | Maximum possible decomposition rate for hollow <i>Sphagnum</i> species.                                                                                                                                                                                                                                                                                             |
| $k_{0,lawn}$ ( $yr^{-1}$ )               | 0.080          | Maximum possible decomposition rate for lawn <i>Sphagnum</i> species.                                                                                                                                                                                                                                                                                               |
| $k_{0,hummock}$ ( $yr^{-1}$ )            | 0.060          | Maximum possible decomposition rate for hummock <i>Sphagnum</i> species.                                                                                                                                                                                                                                                                                            |



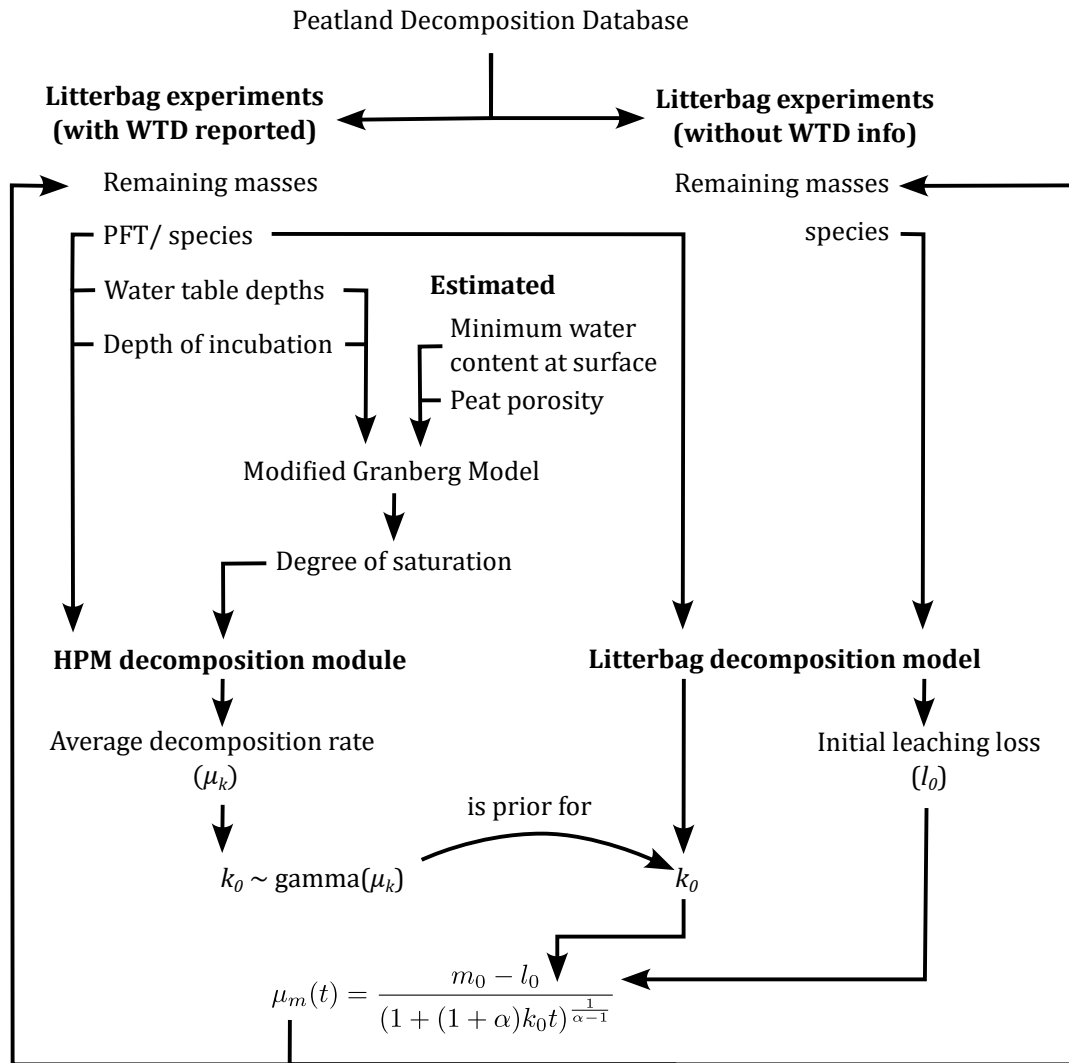

**Figure 1.** Conceptual representation of the modeling approach. Arrows represent flows of information. Litterbag data that have information on water table depths (WTD) and incubation depths are used to estimate average decomposition rates with the HPM decomposition module ( $\mu_k$ ). The HPM decomposition module needs plant functional type identity, peat degree of saturation, WTD, and incubation depth to predict decomposition rates. The modified Granberg model is used to estimate peat degree of saturation at incubation depths from WTD, minimum water content at the surface, and porosity, of which the latter two are estimated from the remaining masses. The litterbag decomposition model is used to estimate decomposition rates ( $k_0$ ) for all litterbag studies, including those that have information on WTD and those that have not. A gamma distribution with  $\mu_k$  as average is used as prior distribution for  $k_0$  for the litterbag experiments that have information on WTD (curved arrow). This helps to constrain initial leaching loss and decomposition rate estimates for studies that can be predicted with the HPM decomposition module. The Litterbag decomposition model also estimates initial leaching losses ( $l_0$ ) for all litterbag experiments. The equation at the bottom uses these to estimate remaining masses in the litterbag experiments. The litterbag decomposition model is described in more detail in section 2.2.1. See the text for further details.

## 2.1 *Sphagnum* litterbag data

To test the HPM decomposition module against litterbag data, we used the Peatland Decomposition Database (Teickner and Knorr, 2024b). In this study, we use data from Bartsch and Moore (1985), Vitt (1990), Johnson and Damman (1991), Szumigalski and Bayley (1996), Prevost et al. (1997), Scheffer et al. (2001), Thormann et al. (2001), Asada and Warner (2005), Trinder et al. (2008), Breeuwer et al. (2008), Straková et al. (2010), Hagemann and Moroni (2015), Golovatskaya and Nikonova (2017), and Mäkilä et al. (2018) to estimate  $k_0$  using the litterbag decomposition model. Data from Johnson and Damman (1991), Szumigalski and Bayley (1996), Prevost et al. (1997), Straková et al. (2010), Golovatskaya and Nikonova (2017), and Mäkilä et al. (2018) reported WTD and therefore only these data were used to predict  $k_0$  also with the HPM decomposition module. Samples originally classified as *Sphagnum magellanicum* are here classified as *Sphagnum magellanicum aggr.* (Hassel et al., 2018).

**Table 2.** Overview on litterbag experiments included for each *Sphagnum* taxon in this study. “HPM microhabitat” is the HPM microhabitat assigned to each taxon. Taxa without value are not considered in Johnson et al. (2015) (see section 2.2.2). “Number of experiments” is the number of litterbag experiments available from the Peatland Decomposition Database (these are either individual replicates or average values of replicates, depending on what data were reported in the studies). “Number of experiments with WTD data” is the number of litterbag experiments that also report water table depths and for which we therefore could make predictions with the HPM decomposition module. “Depth range” are the maximum and minimum depth below the peat surface at which litterbags were placed [cm]. Missing values mean that no study reported depths.

| Taxon                                       | HPM microhabitat | Number of studies | Number of experiments | Number of experiments with WTD data | Depth range |
|---------------------------------------------|------------------|-------------------|-----------------------|-------------------------------------|-------------|
| <i>Sphagnum spec.</i>                       |                  | 2                 | 16                    | 10                                  | 10, 30      |
| <i>S. angustifolium</i>                     | Hummock          | 4                 | 14                    | 8                                   | 1, 30       |
| <i>S. auriculatum</i>                       |                  | 1                 | 3                     | 0                                   | 0, 6        |
| <i>S. balticum</i>                          | Lawn             | 3                 | 12                    | 3                                   | 1, 30       |
| <i>S. cuspidatum</i>                        | Hollow           | 1                 | 5                     | 5                                   | 10, 50      |
| <i>S. fallax</i>                            | Lawn             | 1                 | 4                     | 1                                   | 1, 1        |
| <i>S. fuscum</i>                            | Hummock          | 9                 | 32                    | 13                                  | 1, 50       |
| <i>S. lindbergii</i>                        | Lawn             | 1                 | 2                     | 0                                   |             |
| <i>S. magellanicum aggr.</i>                | Hummock          | 3                 | 7                     | 5                                   | 1, 50       |
| <i>S. majus</i>                             | Hollow           | 1                 | 2                     | 2                                   | 10, 30      |
| <i>S. papillosum</i>                        | Lawn             | 2                 | 6                     | 1                                   | 0, 1        |
| <i>S. rubellum</i>                          | Hummock          | 1                 | 2                     | 2                                   | 10, 30      |
| <i>S. russowii</i>                          | Hummock          | 1                 | 3                     | 2                                   | 1, 1        |
| <i>S. russowii</i> and <i>capillifolium</i> |                  | 1                 | 18                    | 0                                   | 5, 5        |
| <i>S. squarrosum</i>                        | Lawn             | 1                 | 2                     | 0                                   | 0, 0        |
| <i>S. teres</i>                             | Lawn             | 1                 | 1                     | 1                                   | 2, 2        |

## 2.2 Prediction of litterbag decomposition rates with the Holocene Peatland Model

To predict decomposition rates, the HPM decomposition module needs as inputs the litter type in terms of the HPM plant functional types (PFT), the fraction of mass already lost due to previous decomposition, the depth of the litter below the peat surface, the water table depth, and the peat degree of saturation (Frolking et al., 2010).

140 Predicting decomposition rates for the available litterbag data is not straightforward because the HPM decomposition module does not consider specific features of available litterbag experiments. The HPM does not specify how to assign species to plant functional types. Moreover, none of the available litterbag studies reported the degree of saturation which therefore needs to be estimated in order to make predictions with the HPM decomposition module. The only variables that can be directly linked are the depth of the litter below the peat surface, and water table depths (both reported in litterbag experiments). All other variables  
145 can be estimated from available litterbag experiments only with additional assumptions that are described in the following subsections.

In the following subsection, we give a more detailed description of our modeling approach, in particular of the model used to estimate decomposition rates from litterbag data, of the HPM decomposition module and how it predicts decomposition rates, and how we link the decomposition rates estimated from litterbag data to those predicted by the HPM decomposition module.

150 The remaining subsections discuss how we derived or estimated PFT, WTD, and degree of saturation for the litterbag data and additional steps to make the litterbag data compatible with the HPM decomposition module.

### 2.2.1 Remaining masses and decomposition rates

To estimate decomposition rates for available *Sphagnum* litterbag experiments we use the equation from the HPM that computes remaining masses from decomposition rates and decomposition time (Frolking et al., 2001, 2010), with three modifications.

155 The original equation (equation (4) in Frolking et al. (2001)) is:

$$m(t) = \frac{m_0}{(1 + (1 + \alpha)k_0 t)^{\frac{1}{\alpha-1}}}, \quad (1)$$

where  $m(t)$  is the fraction of initial mass remaining at time  $t$ ,  $m_0$  is the fraction of initial mass remaining at time  $t = 0$ ,  $k_0$  is the decomposition rate, and  $\alpha$  is a parameter that describes how decomposition slows down as mass is lost, where the HPM assumes  $\alpha = 2$  for simplicity (Frolking et al., 2001, 2010).

160 The modified version we use here is:

$$\mu_m(t) = \begin{cases} m_0 & \text{if } t = 0 \\ \frac{m_0 - l_0}{(1 + (\alpha - 1)k_0 t)^{\frac{1}{\alpha-1}}} & \text{if } t > 0 \end{cases}, \quad (2)$$

where  $l_0$  is the fraction of mass lost due to initial leaching. The HPM decomposition process does not assume that there are initial leaching losses, but these are commonly observed in litterbag experiments and bias decomposition rate estimates when

they are ignored (Yu et al., 2001; Teickner et al., 2024b); therefore, the modification is necessary to allow a sensible test of the  
 165 HPM decomposition module with litterbag data.

The second modification is that we do not assume  $\alpha = 2$ , but consider it as unknown parameter that is estimated from litterbag data. Since  $\alpha = 2$  was chosen for simplicity and attempts to reliably estimate  $\alpha$  have failed (e.g., Clymo et al., 1998; Frohling et al., 2001; Teickner et al., 2024b), we estimate  $\alpha$  mainly to consider the possible error introduced by this parameter.

The third modification is that we change  $m(t)$  to  $\mu_m(t)$  because we assume that equation (2) describes only the average fraction  
 170 of the initial mass remaining. For each retrieved litterbag, we assume that the remaining mass can be described with a beta distribution with precision parameter  $\phi_m$ :

$$m(t) \sim \text{beta}(\mu_m(t)\phi_m, (1 - \mu_m(t))\phi_m), \quad (3)$$

Values for  $k_0$  are estimated from remaining masses reported in available litterbag experiments conditional on equation (2) and a hierarchical prior structure (Teickner et al., 2024b):

$$175 \quad k_0 = \exp(\beta_{k,1} + \beta_{k,2,\text{species}} + \beta_{k,3,\text{species} \times \text{study}} + \beta_{k,4,\text{sample}}), \quad (4)$$

where  $\beta_{k,1}$  is the estimated decomposition rate across all litterbag experiments,  $\beta_{k,2,\text{species}}$  describes the difference of the average decomposition rate for the *Sphagnum* species,  $\beta_{k,3,\text{species} \times \text{study}}$  for the study (nested within species), and  $\beta_{k,4,\text{sample}}$  for the sample (litterbag experiment). All these parameters have normal distributions as priors. Hierarchical models of the same structure are used to estimate  $l_0$  and  $\alpha$  from equation (2) and to estimate  $\phi_m$  from equation (3).

180 These decomposition rates estimated from litterbag experiments are constrained by decomposition rates the HPM decomposition module (Frohling et al., 2010) predicts for the same litterbag experiments. The HPM decomposition module describes how decomposition rates depend on the *Sphagnum* PFT, the degree of saturation and the depth of a litter sample below the water table. Similar to the remaining mass, we here assume that the HPM decomposition module predicts an average decomposition rate,  $\mu_k$ , instead of the decomposition rate of individual samples:

$$185 \quad \mu_k = \begin{cases} k_{0,i} f_1(W) & \text{if } \hat{z} \leq 0 \\ k_{0,i} f_2(\hat{z}) & \text{if } \hat{z} > 0 \end{cases} \quad (5)$$

where  $k_{0,i}$  is the PFT-specific maximum possible decomposition rate (Tab. 1),  $W$  is the degree of saturation ( $L_{\text{water}} L_{\text{sample}}^{-1}$ ),  $\hat{z}$  the depth of the sample below the average annual water table ( $\hat{z} = z - z_{\text{wt}}$ , where  $z_{\text{wt}}$  and  $z$  are the depth of the water table and litterbag below the peat surface), and  $f_1$  and  $f_2$  are modifiers due to  $W$  (under oxic conditions) and  $\hat{z}$  (under anoxic conditions), respectively. These modifiers are described in equations (8) and (9) in Frohling et al. (2010):

$$190 \quad f_1(W) = 1 - c_1(W - W_{\text{opt}})^2 \quad (6)$$

$$f_2(\hat{z}) = f_{min} + (f_1(1) - f_{min}) \exp\left(\frac{-\hat{z}}{c_2}\right), \quad (7)$$

where all not yet mentioned parameters are defined in Tab. 1.

In our model,  $k_0$  estimated from the litterbag data for each litterbag experiment with reported WTD (sample) (equation (2)) is assumed to follow a gamma distribution with shape parameter  $\alpha_{\mu_k}$  (estimated) and average  $\mu_k$  (predicted for each sample  
195 with equation (5)):

$$k_0 \sim \text{gamma}\left(\alpha_{\mu_k}, \frac{\alpha_{\mu_k}}{\mu_k}\right), \quad (8)$$

Thus, the decomposition rate predicted by the HPM decomposition module (equation (8)) is a prior for  $k_0$  as estimated from the litterbag decomposition model (equation (4)). This forms the link between the litterbag decomposition model and the HPM decomposition module (Fig. 1) and also allows us to estimate parameters of the HPM decomposition module from the  
200 litterbag data. The advantage of this modeling approach is that we can consider litterbag experiments without water table depth to estimate  $l_0$  and  $k_0$  for individual *Sphagnum* species, which is additional information to constrain estimates of the HPM decomposition module parameters. Moreover, combining the litterbag decomposition model and the HPM decomposition module into one Bayesian model does not only estimate HPM decomposition module parameters from the litterbag data, but it also adjusts the decomposition rates estimated from litterbag data to the HPM decomposition module because the HPM  
205 decomposition module serves as prior in the combined model which therefore estimates what parameter values are compatible with the data and the combined model. This is exactly what we want because there is uncertainty both in the remaining masses reported in litterbag experiments and in HPM decomposition module parameters. If HPM decomposition module parameter estimates from the combined model are different from the standard values used in the original model (Tab. 1), even if we consider these uncertainties and use the HPM decomposition module as prior for the litterbag data, this is a discrepancy worth  
210 testing in future experiments.

### 2.2.2 Assignment of *Sphagnum* species to plant functional types

The HPM defines maximum possible decomposition rates ( $k_{0,i}$ ) for three *Sphagnum* PFT (hollow, lawn, and hummock species), but not how to assign species to them. We assigned individual *Sphagnum* species to the three PFT by comparing their niche WTD with the optimal WTD for net primary production defined in the HPM. Specifically, we defined fixed average annual  
215 WTD intervals for the PFT: hollow (<5 cm), lawn ( $\geq 5$  cm and < 15 cm), hummock ( $\geq 15$  cm) based on the HPM (Frolking et al., 2010). Then, we used niche WTD and standard deviations from Johnson et al. (2015) to assign *Sphagnum* species to these three microhabitats. Using only average values and the microhabitat WTD thresholds resulted in unintuitive assignments, such as assigning *S. fallax* to hummocks. To avoid such obvious misclassifications, we defined rules to assign species to HPM microhabitats based on the probability a species would occur in the three niche WTD intervals. To compute the probabilities,  
220 we assumed a normal distribution (Johnson et al., 2015):

1. Species with a probability of occurrence  $\geq 15\%$  in the intervals of all three PFT were classified as lawn species.
2. In all other cases, species were assigned to the PFT for which their probability of occurrence was largest.

Litterbag data from Prevost et al. (1997) are incubations of peat samples where the species is unknown. Based on descriptions in this study, it is likely that the peat was formed by hummock species. Hummock species are assumed to have the smallest decomposition rate among the three *Sphagnum* PFT in the HPM (Frolking et al., 2010) and this is in line with small decomposition rate estimates for these samples (Teickner et al., 2024b). For these reasons, we assigned these samples to the hummock PFT of the HPM.

When estimating parameters of the HPM decomposition module from the litterbag data (see section 2.3.1), we also estimated the maximum possible decomposition rate ( $k_{0,i}$ ). *Sphagnum* species differ in their decomposition rate and the PFT of the HPM are a simplification that may cause misfits of the HPM decomposition module to litterbag data. We therefore estimated  $k_{0,i}$  for individual *Sphagnum* species in models HPM-all, HPM-leaching, and HPM-outlier (see section 2.3.1) and evaluated the variability of these species-specific estimates compared to the standard  $k_{0,i}$  values of the HPM *Sphagnum* PFT.

### 2.2.3 Degree of saturation

We estimated the degree of saturation with the modified Granberg model (ModGberg model) (Granberg et al., 1999; Kettridge and Baird, 2007) from minimum water content at the surface ( $\theta_{0,\min}$ ), total porosity ( $P$ ), the water table depth below the peat surface ( $z_{\text{wt}}$ ), and the depth of the litterbags below the peat surface during the incubation ( $z$ ):

$$\theta(z) = \min \left( P, \theta_0 + (P - \theta_0) \left( \frac{z}{z_{\text{wt}}} \right)^2 \right) \quad (9)$$

$$\theta_0 = \max \left( \theta_{0,\min}, 0.15z_{\text{wt}}^{-0.28} \right),$$

where  $\theta_0$  is the water content at the surface and  $0.15z_{\text{wt}}^{-0.28}$  is an empirical relation of  $\theta_0$  with the WTD (Kettridge and Baird, 2007).

The minimum water content at the surface was not reported in any study and we therefore assumed a minimum water content at the surface of  $0.05 L_{\text{water}} L_{\text{sample}}^{-1}$  with a standard deviation of  $0.05 L_{\text{water}} L_{\text{sample}}^{-1}$ , based on measurements from Hayward and Clymo (1982). The total porosity was not reported in any study and therefore we assumed an average value of 80% with a standard deviation of 10%, roughly based on values reported for low-density *Sphagnum* peat (Liu and Lennartz, 2019). An improved test of the HPM decomposition module would require litterbag experiments with direct measurements of the degree of saturation at sufficient temporal resolution.

### 2.2.4 Fraction of mass lost during previous decomposition

The HPM decomposition module assumes that decomposition rates decrease the more of the initial mass has already been decomposed (Frolking et al., 2001, 2010). All litterbag data we use here, except samples from Prevost et al. (1997), are from

*Sphagnum* samples collected from the surface of peatlands and therefore can be expected to have not experienced mass loss due to decomposition at the start of the experiments ( $m(t = 0) = 1$  in equation (2)). Prevost et al. (1997) incubated *Sphagnum* peat collected from two different depth levels from the same location and these samples probably had already experienced some decomposition, however it is difficult to estimate how much. To avoid this problem, we estimated  $k_{0,i}$  separately for samples from different depths in Prevost et al. (1997), implicitly assuming that these are two different PFT with different maximum possible decomposition rate.

## 2.3 Testing the HPM decomposition module against litterbag data

### 2.3.1 Model versions

To test different aspects of the HPM decomposition module and the additional assumptions we make, we computed several models which differ in whether HPM decomposition module parameters were fixed to their standard values or estimated from data, whether peat properties (porosity, water table depth, water content, minimum water content at the surface) are estimated from data or not, and whether the HPM decomposition module was extended to also predict  $l_0$  or not (Tab. 3).

The first model (HPM-standard) does not estimate any parameters of the HPM decomposition module (equations (5) to (7)) and does not estimate peat properties from the litterbag data and therefore corresponds to the HPM decomposition module with standard parameter values, while propagating prior uncertainties for peat properties. For this model, predictions of  $k_0$  equal  $\mu_k$  (equation (5)). This version of the HPM decomposition module is completely independent of the litterbag decomposition model, meaning that the HPM decomposition module is not used as prior for the litterbag decomposition model (Fig. 1). This also means that to compare  $k_0$  predicted by HPM-standard to  $k_0$  estimated from the litterbag decomposition model, we need to estimate the litterbag decomposition model independently, without using the HPM decomposition module as prior. This independent litterbag decomposition model is called LDM-standard (Tab. 3). We use LDM-standard not only to compare  $k_0$  estimates to  $k_0$  predictions of HPM-standard, but also to analyze how  $k_0$  estimates of the litterbag decomposition model changes when we use different versions of the HPM decomposition module as prior in the subsequent models.

Each subsequent model combines the HPM decomposition module and the litterbag decomposition model into one Bayesian model via equation (8). Each of these models estimates an additional set of parameters from the litterbag data relative to the previous model (Tab. 3). First, only the peat properties (HPM-peat) are estimated, and second all HPM parameters ( $k_{0,i}$ ,  $c_1$ ,  $W_{opt}$ ,  $f_{min}$ ,  $c_2$ ) (HPM-all). Finally, HPM-leaching extends HPM-all by adding formulas to model how  $l_0$  depends on the degree of saturation, similar to how the HPM decomposition module predicts  $k_0$  with equation (6).

HPM-peat tested whether the HPM decomposition module can fit available litterbag data when the HPM decomposition module and the litterbag decomposition model are combined and when peat properties are estimated from data.

HPM-all estimates what HPM decomposition module parameter values are compatible with available litterbag data and therefore allows to test whether the standard parameter values are extreme relative to these estimates. Values of  $k_{0,i}$  were estimated for each species separately, as described in section 2.2.2.

HPM-leaching was computed because decomposition rates estimated from available litterbag experiments are sensitive to initial leaching losses (Yu et al., 2001; Lind et al., 2022; Teickner et al., 2024b). It is therefore interesting to see whether litterbag decomposition rates are estimated differently in HPM-leaching — when initial leaching losses are constrained by adding formulas to model how  $l_0$  depends on the degree of saturation — compared to HPM-all — when initial leaching loss estimates are constrained only by the litterbag decomposition model. Based on previous experiments with tea bags it is reasonable to assume that there is some relation between initial leaching losses and the degree of saturation (Lind et al., 2022). Specifically, we use the following logistic regression model to describe an average initial leaching loss per sample, in dependency of the degree of saturation:

$$\begin{aligned}\mu_l &= \text{logit}^{-1}(\beta_{l,1} + \beta_{l,2}W) \\ l_0 &\sim \text{beta}(\mu_l\phi_l, (1 - \mu_l)\phi_l),\end{aligned}\tag{10}$$

where  $\mu_l$  is the average initial leaching loss for a sample,  $\beta_{l,1}$  is the (hypothetical) average initial leaching loss at a degree of saturation 0 for each taxon,  $\beta_{l,2}$  is the coefficient that describes the relation to the degree of saturation ( $W$ ), and  $\phi_l$  transforms  $\mu_l$  and  $(1 - \mu_l)$  into the shape and rate parameters of a beta distribution. This beta distribution has the same function as the gamma distribution (equation (8)) for  $k_0$  (compare also with Fig. 1): it is a prior for  $l_0$  estimated with the litterbag decomposition model, where the average of this prior is  $\mu_l$ .

To check whether outliers in the litterbag data could influence our results, we computed one additional model, HPM-outlier, with the same structure as HPM-leaching, but estimated without litterbag experiments identified as outliers. Litterbag experiments were defined as outliers if the reported average remaining mass of any litterbag (batch) during the experiment had a posterior probability  $> 99\%$  to be different from the remaining mass predicted by the litterbag decomposition model alone. This procedure identified experiments as outliers where remaining masses increased over time, where litterbags collected at intermediate time points had unexpectedly low remaining masses, or where initial leaching losses were retarded to later time points, presumably because of freezing after the start of the experiment (Teickner et al., 2024b). In total, 5 litterbag experiments were identified as outliers. Results for HPM-outlier are shown in supporting information S8 and HPM decomposition module parameter estimates agree with estimates of HPM-leaching and HPM-all.

Strictly, we do not test the decomposition module in the HPM, but the combination of the HPM decomposition module and the modified Granberg model, assuming that uncertainties in water table depths are negligible and that we accounted sufficiently for uncertainties in total porosity. This ambiguity has to be accepted when combining heterogeneous litterbag data where some variables have to be estimated. Litterbag experiments where water table depths and the degree of saturation are measured at sufficient temporal resolution are needed to avoid this ambiguity in future studies and to improve any test of the HPM decomposition module.



**Table 3.** Overview of HPM decomposition module modifications computed in this study.

| Model        | Description                                                                                                                                                                                                                                                                                                                                                          |
|--------------|----------------------------------------------------------------------------------------------------------------------------------------------------------------------------------------------------------------------------------------------------------------------------------------------------------------------------------------------------------------------|
| LDM-standard | The litterbag decomposition model without the HPM decomposition module as prior. This is model 1-4 from Teickner et al. (2024b).                                                                                                                                                                                                                                     |
| HPM-standard | The Holocene Peatland Model decomposition module with standard parameter values (Frolking et al., 2010). The model is run with peat water contents estimated with the modified Granberg model, using water table depths and litterbag depths reported from the litterbag studies, and assuming a fixed peat porosity, and minimum peat water content at the surface. |
| HPM-peat     | The same as HPM-standard, but combined with LDM-standard into one Bayesian model, where the HPM decomposition module is a prior for the litterbag decomposition model (Fig. 1). Water table depths, peat porosity, and minimum peat water content at the surface are estimated from data.                                                                            |
| HPM-all      | The same as HPM-peat, but now also parameters from the HPM decomposition module ( $k_{0,i}$ , $W_{opt}$ , $f_{min}$ , $c_1$ , $c_2$ ) are estimated from the litterbag data.                                                                                                                                                                                         |
| HPM-leaching | The same as HPM-all, but now also an average initial leaching loss for each species and, across all species, a factor, by which this average leaching loss increases or decreases as the peat degree of saturation increases, are estimated (equation (10)).                                                                                                         |
| HPM-outlier  | The same as HPM-leaching, but computed without litterbag experiments that were identified as outliers (see the text for details).                                                                                                                                                                                                                                    |

### 310 2.3.2 Bayesian data analysis

All models listed in Tab. 3 were computed with Bayesian statistics to account for relevant uncertainty sources and include relevant prior knowledge (for example that *Sphagnum* decomposition rates are unlikely to be larger than  $0.5 \text{ yr}^{-1}$ ). Bayesian computations were performed using Markov Chain Monte Carlo (MCMC) sampling with Stan (2.32.2) (Stan Development Team, 2021a) in R (4.2.0) (R Core Team, 2022) via the rstan package (2.32.5) (Stan Development Team, 2021b) using the  
315 NUTS sampler (Hoffman and Gelman, 2014), with four chains, 4000 total iterations per chain, and 2000 warmup iterations per chain. None of the models had divergent transitions, the minimum bulk effective sample size was larger than 400, and the largest rank-normalized  $\hat{R}$  was 1.01, indicating that all chains converged (Vehtari et al., 2021). All models used the same priors for the same parameters and prior choices are listed and justified in supporting Tab. S1. Results of prior and posterior predictive checks are shown in supporting section S3.

320 We used power-scaling of the prior and likelihood distributions as implemented in the priorsense package (0.0.0.9000)  
(Kallioinen et al., 2024) to analyze the relative sensitivity of the posterior distribution to small perturbations of the prior  
and likelihood in HPM-leaching for HPM decomposition module parameters and peat properties. This is a computationally  
nonexpensive way to check whether the data provide information about a parameter and where prior and data may provide  
conflicting information (Kallioinen et al., 2024). Results of this analysis and further information on the data analysis are shown  
325 in supporting information S2.

### 2.3.3 Fit of model predictions to estimated decomposition rates and observed remaining masses

To analyze how well the models fit remaining masses observed in the litterbag experiments, we plotted reported remaining  
masses versus remaining masses estimated by the litterbag decomposition model in HPM-peat, HPM-all, and HPM-leaching.  
HPM-standard is not linked to the litterbag decomposition model and therefore does not predict remaining masses.

330 To analyze how well all HPM decomposition module versions fit  $k_0$  estimated by the respective litterbag decomposition  
model, we created a similar plot for  $k_0$ . Here, we compared predictions of HPM-standard (equation (8)) against estimates of  
LDM-standard (equation (4)). We also computed the average difference of  $k_0$  predicted by the HPM decomposition module  
and estimated from the litterbag data. We then computed the posterior probability that this average difference is different from  
zero. A large probability indicates a misfit of the model to available litterbag data. We also tested the same difference for  
335 specific species because graphical checks indicated that the decomposition rate prediction skill of the HPM decomposition  
module depends on species.

To test whether HPM-leaching has not only a better fit to available litterbag data, but also a better predictive accuracy for  
novel data than the model with standard parameter values (HPM-standard), we compared how well both can predict  $k_0$  from  
litterbag experiments. HPM decomposition module parameters of HPM-standard are not estimated from data and therefore we  
340 could compute the root mean square error of prediction ( $\text{RMSE}_{\text{test}}$ ) directly with  $k_0$  predicted by HPM-standard and estimated  
with LDM-standard. HPM decomposition module parameters of HPM-leaching are estimated from the litterbag data and we  
therefore used cross-validation (CV) to estimate  $\text{RMSE}_{\text{test}}$ . Since decomposition rates from the same species and study usually  
are not independent, we defined blocks which were used as CV-folds. Each fold represents the data from one study, but only if  
there were still data for the same *Sphagnum* species left in the remaining data (we want to estimate the predictive accuracy not  
345 for new species). Species with data from one study only were always used for model training and not part of the testing folds.  
This procedure resulted in 5 folds. HPM-standard and HPM-leaching were tested against the same data. In the text,  $\text{RMSE}_{\text{train}}$   
is the RMSE computed with the data a model was estimated with (for HPM-standard, the data the litterbag decomposition  
model was estimated with), and  $\text{RMSE}_{\text{test}}$  is the RMSE computed with independent test data.

### 2.3.4 Changes in $k_0$ and $l_0$ estimates of the litterbag decomposition models compared to LDM-standard

350 To analyze how parameter values of the litterbag decomposition model change when it is combined with different versions of  
the HPM decomposition module as prior, we estimated the average difference of  $k_0$  and  $l_0$  estimates of each model version  
to  $k_0$  and  $l_0$  estimates of LDM-standard. In particular, this allowed us to analyze whether there is any change in the relative

magnitude of  $l_0$  and  $k_0$  because the litterbag decomposition module would adjust these parameter values to fit the respective HPM decomposition module prior and still fit the observed remaining masses.

### 355 2.3.5 Magnitudes of $k_0$ along the gradient from oxic to anoxic conditions

To analyze how  $k_0$  changes along the gradient from oxic to anoxic conditions, we plotted  $k_0$  estimated by LDM-standard versus the water table depth below the litterbags. To this plot, we added  $k_0$  predicted by HPM-standard. To analyze how the relation of  $k_0$  changes for the HPM decomposition module modifications compared to HPM-standard, we computed differences between  $k_0$  estimated by HPM-peat, HPM-all, and HPM-leaching, respectively, and HPM-standard, and plotted these differences versus  
360 the water table depth below the litterbags.

### 2.3.6 Difference between values of $k_{0,i}$ , $c_1$ , $W_{opt}$ , $c_2$ , $f_{min}$ estimated from litterbag data to the standard parameter values

For HPM-all and HPM-leaching, we computed the posterior probability that the HPM decomposition module parameter values estimated from litterbag data ( $k_{0,i}$ ,  $c_1$ ,  $W_{opt}$ ,  $c_2$ ,  $f_{min}$ ) differ from the standard parameter values (Tab. 1). This way, we could  
365 identify discrepancies between standard parameter values and parameter values estimated from available litterbag data.

For HPM-leaching, we conducted in addition a sensitivity analysis, where we simulated decomposition of *S. fuscum* incubated at different depths in a peatland with water table depth of 40 cm below the surface, a porosity of  $0.7 L_{pores} L_{sample}^{-1}$ , and a minimum water content at the surface of  $0.05 g_{water} g_{sample}^{-1}$ . With these settings, we predicted five sets of average  $k_0$ : (1) with HPM-leaching ( $k_{0,modified}(HPM-leaching)$ ). The remaining four sets were also predicted with HPM-leaching, but each time  
370 setting one of the HPM decomposition module parameters to their standard value ( $k_{0,standard}(HPM-leaching)$ ): (2)  $c_1$ , (3)  $W_{opt}$ , (4)  $f_{min}$ , (5)  $c_2$ . We then computed the difference of  $k_0$  from set (1) and (2) to analyze the effect of the new  $c_1$  estimate, from set (1) and (3) to analyze the effect of the new  $W_{opt}$  estimate, and so on for sets (4) and (5). This gives the difference in decomposition rates of HPM-leaching if we would set individual HPM decomposition module parameters to their standard values. This way, we could analyze what HPM decomposition module parameters contribute to a change in  $k_0$  predictions  
375 along the gradient from oxic to anoxic conditions.

## 3 Results

### 3.1 Fit and predictive accuracy of the different versions of the HPM decomposition module to available litterbag data

In each model, the litterbag decomposition model fitted the observed remaining masses similarly well (Fig. 2 (a) and supporting Fig. S2), no matter whether the HPM decomposition module was used as prior or not, and whether its parameters were  
380 estimated from data (HPM-all, HPM-leaching) or not (HPM-peat). Thus, remaining masses do not indicate large differences between the model versions.

For  $k_0$ , the picture is more nuanced: When the HPM decomposition module is not used as prior (HPM-standard), it fitted  $k_0$  estimated by the litterbag decomposition model on average less well than when it was used as prior (all other model versions) (Fig. 2, Tab. 4). For example, HPM-standard had an average  $\text{RMSE}_{\text{train}}$  of  $0.11 \text{ yr}^{-1}$ , whereas HPM-leaching had an average  $\text{RMSE}_{\text{train}}$  of  $0.02 \text{ yr}^{-1}$ . However, the cross-validation indicates that when applied to novel samples, both HPM-standard and HPM-leaching would perform similarly well if one considers the large uncertainty of the  $\text{RMSE}_{\text{test}}$  estimates (Tab. 4). Interestingly, all model versions where the HPM decomposition module was used as prior had comparable fits ( $\text{RMSE}_{\text{train}}$ ) (Tab. 4), even the version that still has standard parameter values for the HPM decomposition module (HPM-peat). This indicates that a change in HPM decomposition module standard parameter values is not required to make the HPM decomposition module fit  $k_0$  values estimated from available litterbag data via the litterbag decomposition model, under the assumptions we made. Instead, the results indicate that parameter values of the litterbag decomposition model can be adjusted to fit predictions of this HPM decomposition module prior.

**Table 4.** Training and testing RMSE for decomposition rates as predicted by different versions of the decomposition module of the Holocene Peatland Model (see Tab. 3 for a description of the models) and number of misfits.  $\text{RMSE}_{\text{train}}(k_0)$  is the root mean square error of model predictions for litterbag replicates used during model computation.  $\text{RMSE}_{\text{test}}(k_0)$  is the RMSE for litterbag replicates used in blocked cross-validation. Where no  $\text{RMSE}_{\text{test}}(k_0)$  is given, it was not computed for these models. Values are averages and lower and upper bounds of central 95% posterior intervals ( $\text{yr}^{-1}$ ). Misfits counts the number of litterbag experiments for which  $k_0$  predicted by the HPM decomposition module modification differed from  $k_0$  as estimated from the litterbag decomposition model with a posterior probability of at least 99%. In total,  $k_0$  was predicted with the HPM decomposition module modifications for 53 litterbag experiments ( $\text{RMSE}_{\text{train}}(k_0)$ ) or 29 ( $\text{RMSE}_{\text{test}}(k_0)$ ).

| Model        | $\text{RMSE}_{\text{train}}(k_0)$ | $\text{RMSE}_{\text{test}}(k_0)$ | Misfits |
|--------------|-----------------------------------|----------------------------------|---------|
| HPM-standard | 0.105 (0.051, 0.191)              | 0.136 (0.06, 0.252)              | 13      |
| HPM-peat     | 0.02 (0.013, 0.029)               |                                  | 0       |
| HPM-all      | 0.014 (0.008, 0.021)              |                                  | 0       |
| HPM-leaching | 0.022 (0.012, 0.039)              | 0.088 (0.038, 0.179)             | 0       |
| HPM-outlier  | 0.021 (0.013, 0.032)              |                                  | 0       |

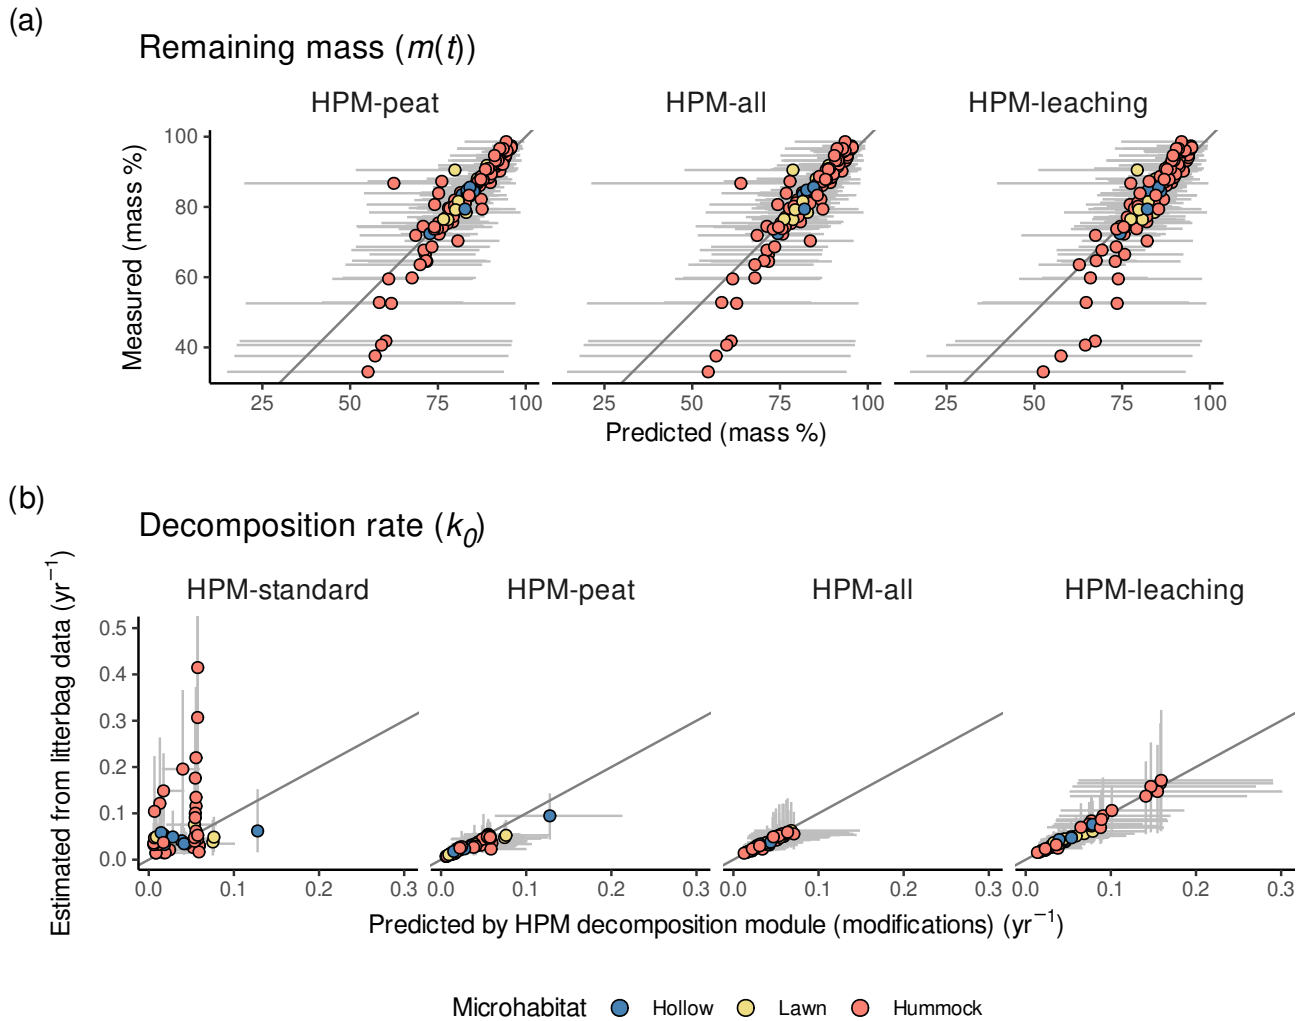

**Figure 2.** (a) Measured remaining masses versus remaining masses predicted by the litterbag decomposition model combined with each HPM decomposition module version. Values are shown for litterbag experiments with reported water table data. For HPM-standard no values are shown because it was not combined with a litterbag decomposition model. (b)  $k_0$  estimated by the litterbag decomposition model versus  $k_0$  predicted by different modifications of the HPM decomposition module (Tab. 3). For HPM-standard, y-axis values are  $k_0$  estimates of LDM-standard. For all other model versions, y-axis values are  $k_0$  estimates of the litterbag decomposition module with the respective HPM decomposition module version as prior. Points represent average estimates and error bars 95% posterior intervals. Points are colored according to the microhabitat classification of *Sphagnum species* (see the Methods section for details). In (b), error bars exceeding  $0.5 \text{ yr}^{-1}$  are clipped.

### 3.2 How are parameter values of the litterbag decomposition model adjusted when different versions of the HPM decomposition module are used as prior?

395 To understand how using the HPM decomposition module as prior changes  $k_0$  and  $l_0$  estimates of the litterbag decomposition model, we compared  $k_0$  and  $l_0$  estimates of the litterbag decomposition model of each model version with the  $k_0$  and  $l_0$  estimates of LDM-standard. We computed the average difference of  $k_0$  estimates by the litterbag decomposition model for all models compared to the  $k_0$  estimates of LDM-standard (using only litterbag experiments with reported WTD). Average differences compared to LDM-standard are in the order HPM-peat < HPM-all < HPM-leaching (average and 95% confidence interval: -0.04 (-0.06, -0.02) < -0.03 (-0.06, -0.01) < -0.01 (-0.04, 0.01) yr<sup>-1</sup>). The magnitude (mean absolute difference) of adjustments of  $k_0$  estimates is different for different species (species with at least 3 samples): The largest average absolute differences across all models were made for *S. angustifolium* (0.15 (0.06, 0.27) yr<sup>-1</sup>) and the smallest for *Sphagnum* spec. (0.01 (0.01, 0.02) yr<sup>-1</sup>). This indicates that for some species  $k_0$  estimates of the litterbag decomposition model are forced to smaller values for HPM-peat and HPM-all, whereas differences are smaller for HPM-leaching.

405 With these changes in  $k_0$  estimates, a similar fit to remaining masses as observed for all models (see the previous subsection) is only possible when  $l_0$  estimates are changed in the opposite direction. To check this, we computed the average difference of  $l_0$  estimates by the litterbag decomposition model for all model versions compared to the  $l_0$  estimates of LDM-standard. Differences compared to LDM-standard are in the order HPM-leaching < HPM-all < HPM-peat (average and 95% confidence interval: 0.1 (-1.9, 2.2) < 2.8 (0.7, 4.8) < 3.3 (1.6, 5) mass %). Again, the magnitude (mean absolute difference) of adjustments of  $l_0$  estimates is different for different species (species with at least 3 samples): The largest average absolute differences across all models were made for *S. angustifolium* (11.4 (7, 16.6) mass %) and the smallest for *Sphagnum* spec. (1.43 (0.86, 2.39) mass %). Thus, the smaller  $k_0$  estimates are indeed compensated by larger  $l_0$  estimates for HPM-peat and HPM-all, whereas the difference to LDM-standard is smaller for HPM-leaching.

Overall, this analysis indicates that errors in remaining masses observed in available litterbag experiments are large enough to support a range of  $k_0$  and  $l_0$  estimates. The equivalent fit of the different model versions is therefore caused by adjusting  $k_0$  to the HPM prior, and adjusting  $l_0$  as needed to fit observed masses.

### 3.3 How do HPM decomposition module parameter estimates differ to the standard values?

Two model versions estimated HPM decomposition module parameters ( $c_1, W_{opt}, f_{min}, c_2, k_{0,i}$ ): HPM-all and HPM-leaching. These models indicate larger values for  $c_2$  and  $W_{opt}$  than the standard values. Figure 3 shows marginal posterior densities of the HPM decomposition module parameters for HPM-all, with standard parameter values as defined in Frolking et al. (2010) indicated by vertical lines. For both HPM-all and HPM-leaching, there are large posterior probabilities that  $c_2$  ( $P_{\text{HPM-all}}(c_2 > 0.3 \text{ m}) = 1$  and  $P_{\text{HPM-leaching}}(c_2 > 0.3 \text{ m}) = 1$ ) and  $W_{opt}$  ( $P_{\text{HPM-all}}(W_{opt} > 0.45 L_{\text{water}} L_{\text{pores}}^{-1}) = 1$  and  $P_{\text{HPM-leaching}}(W_{opt} > 0.45 L_{\text{water}} L_{\text{pores}}^{-1}) = 0.98$ ) have larger values than the standard parameter values, indicating a discrepancy between the HPM decomposition module and available litterbag data (Fig. 3 and supporting Fig. S11). In contrast, estimates for  $f_{min}$  do not differ much to the prior value and the power-scaling sensitivity analysis indicates a weak influence of the data (supporting information

S2) and therefore that currently available litterbag data provide only little information about minimum decomposition rates under anoxic conditions. HPM-all and HPM-leaching suggest a large variability of  $k_{0,i}$  for individual species: Both models estimate a large posterior probability ( $> 95\%$ ) that *S. russowii* and *S. rubellum* have a larger, and that *S. cuspidatum* has a smaller maximum possible decomposition rate ( $k_{0,i}$ ) than the standard values for the respective PFT (Fig. 3 (b) and supporting 430 Fig. S11). However, estimates for  $k_{0,i}$  were very variable for the same species when different subsets of the litterbag data were used to estimate the model in the cross-validation. This indicates that samples of the same species from different studies have a large variability in  $k_{0,i}$  values. In summary, when HPM decomposition module parameters are estimated from available litterbag data, estimates for  $W_{opt}$  and  $c_2$  are larger than the standard values, differences to the  $c_1$  and  $f_{min}$  standard value cannot be detected, and estimates for  $k_{0,i}$  are variable and have large errors for different species.

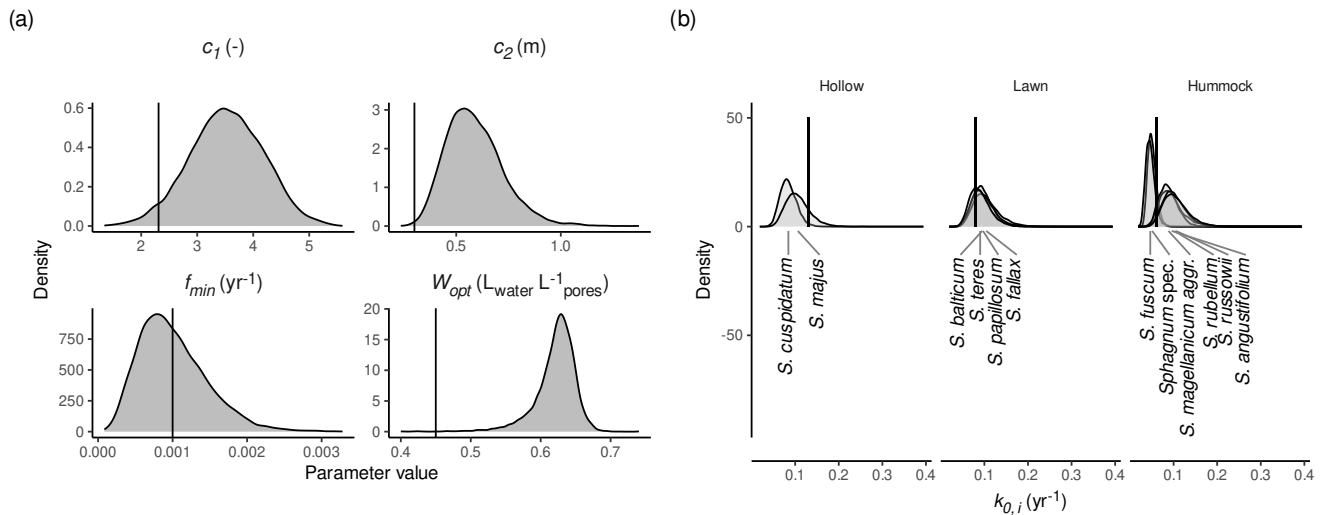

**Figure 3.** Marginal posterior distributions of HPM decomposition module parameters (see Tab. 1) as estimated by HPM-all. (a) Marginal posterior distributions for  $c_1$ ,  $W_{opt}$ ,  $f_{min}$ , and  $c_2$ . (b) Marginal posterior distributions for  $k_{0,i}$  (maximum possible decomposition rate for species  $i$ ). Species were assigned to HPM microhabitats as described in section 2.2.2. Vertical black lines are the standard parameter values from Froelking et al. (2010). *Sphagnum* spec. are samples that have been identified only to the genus level.

### 435 3.4 Magnitude and change of decomposition rates along the gradient from oxic to anoxic conditions

A comparison of  $k_0$  estimates of LDM-standard and  $k_0$  estimates of HPM-standard shows that the HPM decomposition module with standard parameter values implies a steeper decrease of decomposition rates from oxic to anoxic conditions than LDM-standard and, for some species, smaller anaerobic decomposition rates. Figure 4 (a) shows  $k_0$  estimated by LDM-standard and  $k_0$  predicted by HPM-standard versus water table depths below the litterbags reported in the studies for species with at 440 least three litterbag experiments. Regression lines were fitted to both sets of  $k_0$  values and they indicate an on average steeper slope for HPM-standard than for LDM-standard for many species (with large uncertainties). Moreover, under anoxic conditions

(negative water table depth),  $k_0$  estimates by LDM-standard are larger on average for many of the litterbag experiments than what HPM-standard predicts (Fig. 4 (b)).

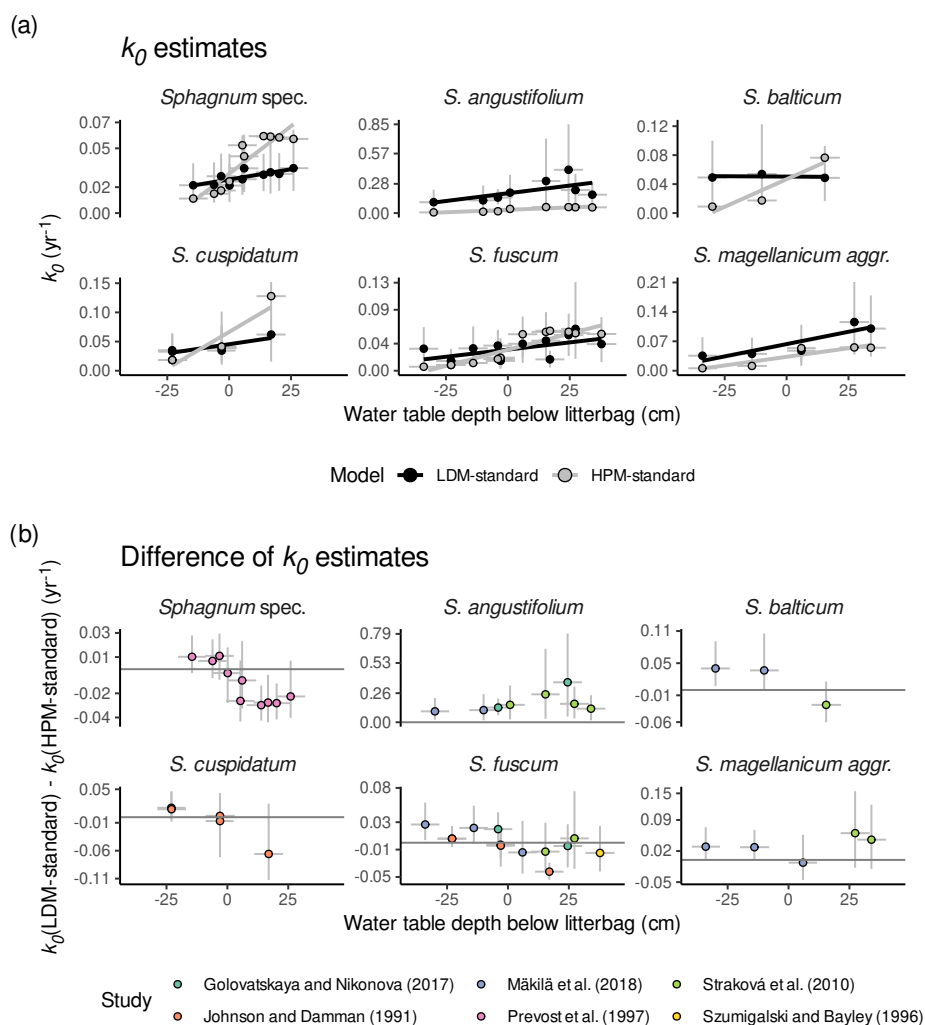

**Figure 4.** Comparison of  $k_0$  estimates of HPM-standard and LDM-standard (Tab. 3) for species with at least three litterbag experiments. (a)  $k_0$  estimates of HPM-standard (grey) and  $k_0$  estimates of LDM-standard (black) versus reported average water table depths below the litterbags (negative values represent litterbags placed below the water table, positive values represent litterbags placed above the water table in the unsaturated zone). (b)  $k_0$  estimates of LDM-standard minus  $k_0$  estimates of HPM-standard versus reported average water table depths below the litterbags (i.e., the difference of the values shown in (a)). Grey horizontal lines indicate a difference in  $k_0$  of  $0 \text{ yr}^{-1}$ . Points represent average estimates and error bars 95% posterior intervals. Lines are predictions of linear models fitted to the average estimates. *Sphagnum* spec. are samples that have been identified only to the genus level.



A comparison of  $k_0$  estimates of HPM-standard and the other modifications of the HPM decomposition module suggests that  
445 when HPM decomposition module parameters are estimated, larger anaerobic decomposition rates and a less steep decrease  
of decomposition rates from oxic to anoxic conditions are predicted, similar to LDM-standard. We computed the difference of  
 $k_0$  predicted by HPM-standard and the other HPM decomposition module versions (Fig. 5). When the HPM decomposition  
module with standard parameter values is used as prior for the litterbag decomposition module (HPM-peat), it predicts  $k_0$  nearly  
identical to HPM-standard. In contrast, both model versions where HPM decomposition module parameters were estimated  
450 predict larger anaerobic decomposition rates and less of an increase under oxic conditions relative to anoxic conditions  
than HPM-standard. Thus, the HPM decomposition module with standard parameter values predicts a steeper decrease of  
decomposition rates from oxic to anoxic conditions and overall smaller anaerobic decomposition rates than LDM-standard and  
the models that estimate HPM decomposition module parameters from available litterbag data.

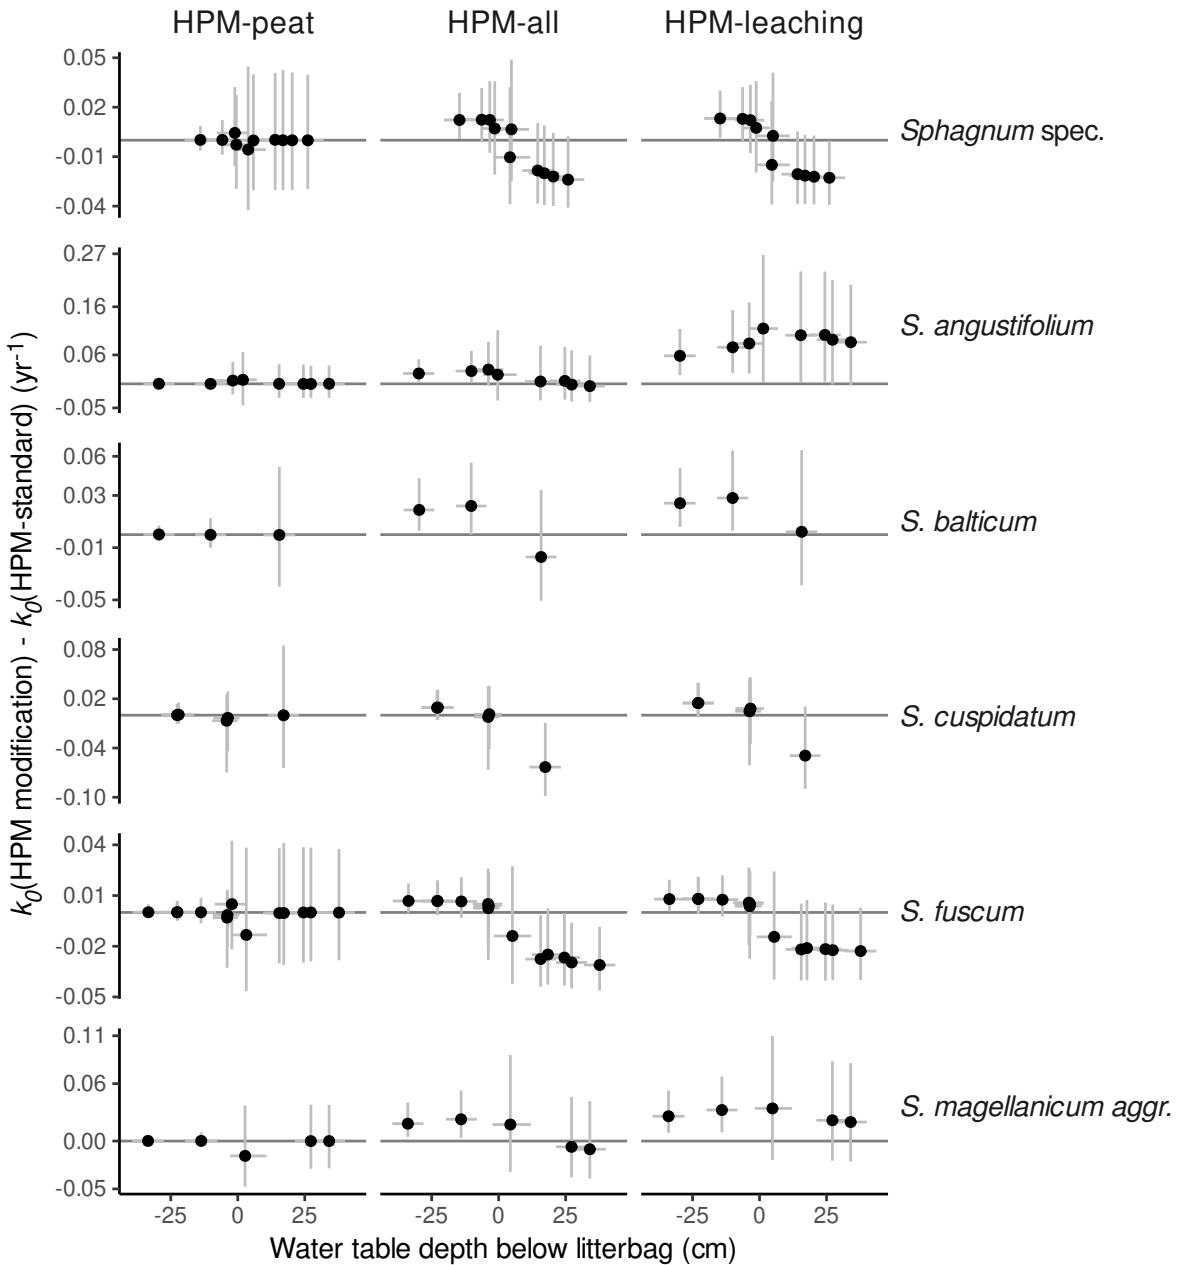

**Figure 5.**  $k_0$  predicted by HPM decomposition module modifications (either HPM-peat, HPM-all, or HPM-leaching) minus  $k_0$  predicted by the HPM decomposition module with standard parameter values (HPM-standard) versus estimated average water table depths below the litterbags (negative values represent litterbags placed below the water table, positive values represent litterbags placed above the water table in the unsaturated zone). Points represent average estimates and error bars 95% posterior intervals. *Sphagnum spec.* are samples which that been identified only to the genus level. Only data for species with at least three replicates are shown.

### 3.5 HPM decomposition module parameters that are responsible for the less steep gradient in decomposition rates from oxic to anoxic conditions

455

To analyze which of the HPM decomposition module parameters ( $c_1$ ,  $W_{opt}$ ,  $f_{min}$ ,  $c_2$ ) cause the less steep gradient in decomposition rates from oxic to anoxic conditions, we conducted a sensitivity analysis, where we made predictions with HPM-leaching for the same species and the same gradient from oxic to anoxic conditions, each time setting one of the four parameters to their standard values (four sets of predictions in total). We then computed the difference of the predicted  $k_0$  values to predictions of HPM-leaching (with no parameter value set to its standard value). This difference is plotted versus the depth of the water table below the litter, as shown in Fig. 6. This analysis suggests that  $W_{opt}$  and  $c_2$  cause the less steep gradient in decomposition rates from oxic to anoxic conditions, whereas the other two parameters have no qualitative influence.

460

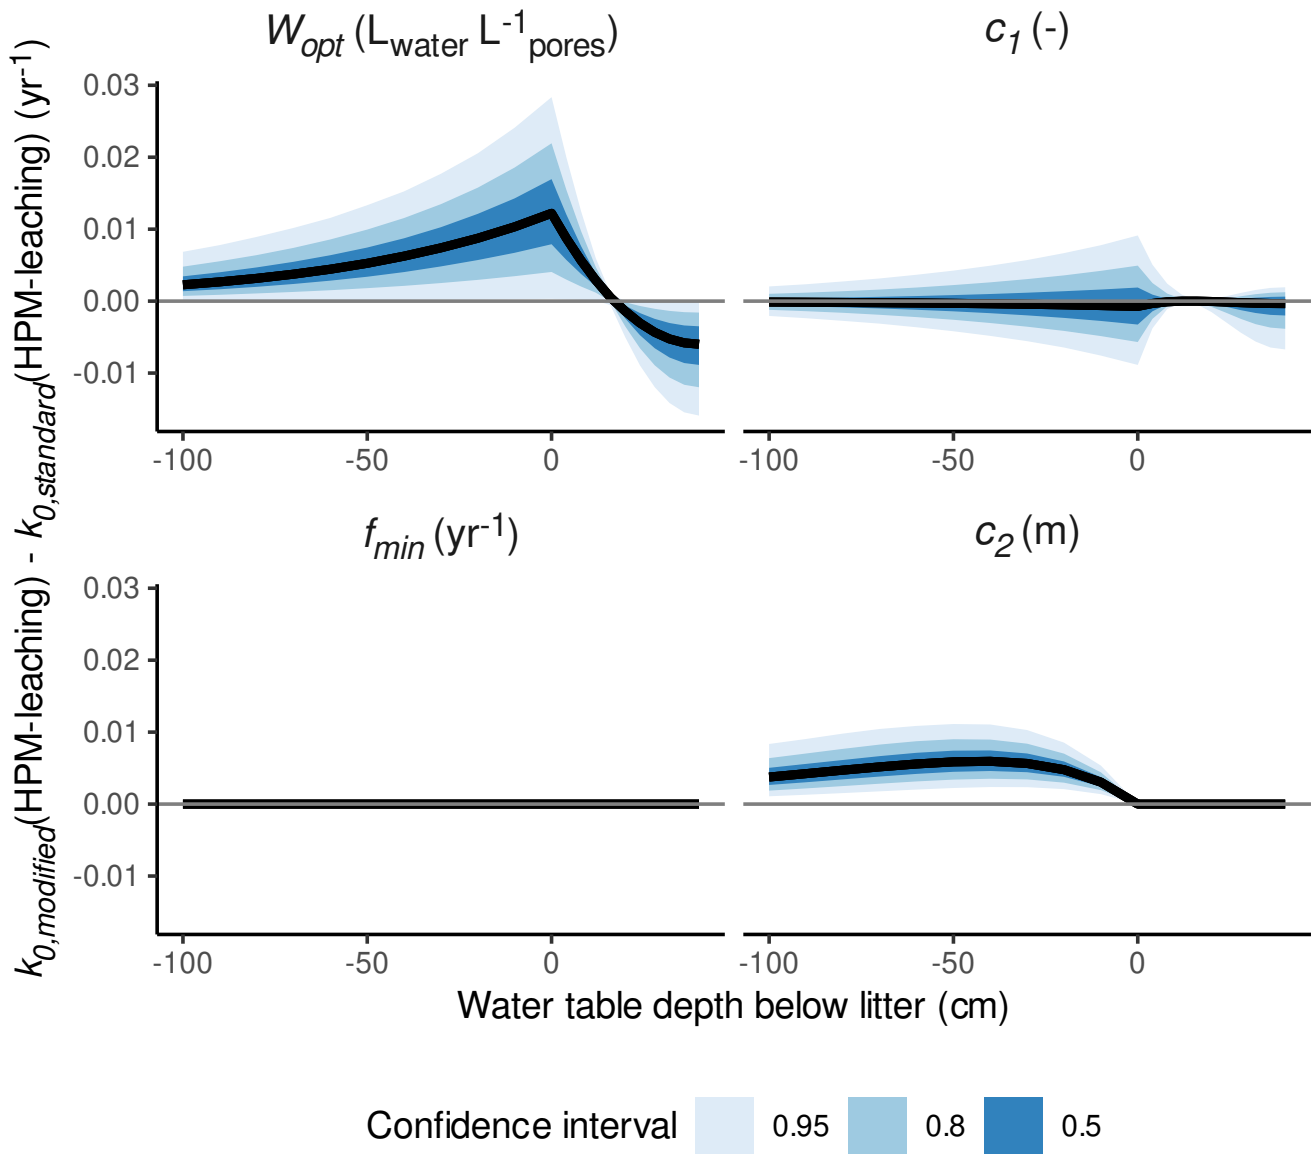

**Figure 6.** Difference between decomposition rates for *S. fuscum* predicted with parameter values estimated by HPM-leaching ( $k_{0,modified}(\text{HPM-leaching})$ ), and when setting the HPM decomposition module parameter in the panel title to its standard value ( $k_{0,standard}(\text{HPM-leaching})$ ), versus the water table depth below the litter (negative values represent litter placed below the water table, positive values represent litter placed above the water table in the unsaturated zone). Panels show results when different parameters are set to their standard values. Positive  $k_{0,modified}(\text{HPM-leaching}) - k_{0,standard}(\text{HPM-leaching})$  means that decomposition rates are larger when using the estimated parameter value compared to using the standard parameter value. Shaded areas are central confidence intervals with probabilities given in the figure legend.

### 3.6 Relation of $l_0$ to the degree of saturation

In model HPM-leaching, we included a logistic regression model that estimates the relation between  $l_0$  and the degree of saturation. The parameter estimates suggest that both positive and negative relations of  $l_0$  to the degree of saturation are compatible with available litterbag data (95% confidence intervals for the slope (logit scale): (-0.28, 0.15)). Thus, available litterbag data do not allow to conclude whether  $l_0$  are positively related to the degree of saturation or not.

## 4 Discussion

Our aims were to test whether the HPM decomposition module fits decomposition rates estimated from available litterbag experiments, to estimate HPM decomposition module parameters from available litterbag experiments, to understand what factors could cause differences in parameter estimates to the standard values, and to check whether the estimates from litterbag data could imply significant differences in peat accumulation predicted by the HPM compared to the standard parameter values.

The parameter estimates derived from available litterbag data suggest differences in the control of decomposition rates compared to the standard parameter values: the HPM decomposition module with standard parameter values predicts a steeper decrease of decomposition rates from oxic to anoxic conditions and smaller anaerobic decomposition rates for several species than estimated from LDM-standard and the models that estimate HPM decomposition module parameters from available litterbag data. These differences imply larger estimates for  $W_{opt}$ , the degree of saturation where decomposition rates are maximal, and  $c_2$ , the anoxia scale length (the parameter that controls how strong decomposition rates decrease below the water table depth). We will show here, by comparing parameter estimates to results from sensitivity analyses of the HPM, that the new parameter estimates can cause large differences in long-term peat accumulation predicted by the HPM.

Our analysis suggests that the HPM decomposition module with standard parameter values fits available litterbag data, but our modifications, where  $W_{opt}$ ,  $c_2$ , and (for some species)  $k_{0,i}$  estimates significantly differ from the standard values, have equivalent fit. This can be explained by two mechanisms: first, the litterbag decomposition model explains mass loss by initial leaching and decomposition. Thus, remaining masses reported in a litterbag experiment can be fitted either by assuming a larger  $l_0$  and smaller  $k_0$ , or by assuming a smaller  $l_0$  and larger  $k_0$ . By this first mechanism, the litterbag decomposition model can first estimate  $k_0$  to agree with the HPM decomposition module and then adjust  $l_0$  to fit the remaining masses of the litterbag experiments. The second mechanism is the impact of the design of available *Sphagnum* litterbag experiments on the accuracy of  $l_0$  and  $k_0$  estimates: initial leaching losses can explain mass losses only at the start of the experiment (equation (2)), but decomposition explains a continuous mass loss. It is therefore possible to estimate  $l_0$  and  $k_0$  accurately when remaining masses shortly after the start of the experiment are recorded, but the majority of litterbag experiments collects the first litterbags only after half a year or later (Teickner et al., 2024b). This causes large errors in  $l_0$  and  $k_0$  estimates and therefore allows the model to adjust  $l_0$  and  $k_0$  by the first mechanism, such that all model versions have equivalent fit to remaining masses while also fitting decomposition rates suggested by different HPM decomposition module priors. Improved litterbag experiments are needed for more accurate tests of any peatland decomposition module and for obtaining parameter estimates accurate enough to allow

495 even only approximate predictions of long-term peat accumulation. Applications of the HPM should consider this variability in parameter estimates compatible with available litterbag experiments.

In the next subsections, we first evaluate the reliability of our test. We discuss whether the identified parameter value differences could be an artifact of using heterogeneous litterbag data, and we discuss how compatible the new HPM decomposition module parameter estimates are with other studies that analyzed how decomposition rates differ in dependency of water availability or that estimated  $c_2$  from peat core data. Second, we address the remaining aims: we discuss what factors could cause the larger anaerobic decomposition rates and, in some cases, smaller aerobic decomposition rates estimated by the litterbag decomposition model, and we discuss what implications the differences between estimated and standard parameter values have for peat accumulation predicted by the HPM. Finally, we give recommendations for improving tests of peat decomposition modules.

#### 505 4.1 Reliability of the identified discrepancies

Before analyzing potential causes of the discrepancies found for  $c_2$  and  $W_{opt}$  we first ask if combining different litterbag experiments is reliable evidence for the less steep gradient in decomposition rates from oxic to anoxic conditions.

If we take a look at the misfits of the standard HPM decomposition module (HPM-standard) shown in Fig. 4, many, but not all underestimations of aerobic decomposition rates could have been caused by other factors: for example for *S. balticum* the difference may have been caused by differences in the two litterbag experiments from which we collected the data because the replicate with positive water table depth is from Straková et al. (2010), whereas the two others are from Mäkilä et al. (2018) (Fig. 4). The less pronounced gradient in measured decomposition rates above the water table depth is, however, also visible for *S. fuscum* replicates within the same study and in addition similar across these (independent) studies (Fig. 4, supporting information S6) (Johnson and Damman, 1991; Golovatskaya and Nikonova, 2017; Mäkilä et al., 2018), indicating that this pattern cannot be explained in all cases by differences between studies. In addition, during the cross-validation, we removed data from individual studies from the model and the remaining subsets still resulted in similar estimates for  $c_2$  and  $W_{opt}$  (supporting Fig. S12). Finally, numerous previous studies suggest that water table depth is an important control of decomposition rates (e.g., Blodau et al., 2004) and one may therefore expect that also between different studies decomposition rate differences should be controlled to a large degree by differences in water table depths. Thus, even with the heterogeneous litterbag data currently available, a less steep gradient of decomposition rates from oxic to anoxic conditions appears to be replicable between studies and species. To fully rule out that this pattern may be biased by heterogeneous litterbag data and biases of the litterbag decomposition model, controlled litterbag experiments that systematically estimate decomposition rates along the gradient from oxic to anoxic conditions are needed.

The  $W_{opt}$  estimate suggested by HPM-leaching is near the average optimum of heterotrophic respiration estimated across a range of mineral soils (Moyano et al., 2013). The estimate is also in line with a study where the largest decomposition rates of the same litter type were observed at or just above the average water table level in hummocks (Belyea, 1996), and with maximum CO<sub>2</sub> production rates around 13 cm above the water table level in a mesocosm study (Blodau et al., 2004). According to the ModGberg model the degree of saturation at this depth is near the  $W_{opt}$  estimate suggested by HPM-all

and HPM-leaching. For example, for our simulation analysis used to produce Fig. 6, the average  $W_{opt}$  estimated by model  
530 HPM-leaching ( $0.57 L_{water} L_{pores}^{-1}$ ) is reached around 16 cm above the water table level, as shown in Fig. 7. At shallower depths,  
the degree of saturation decreases below the  $W_{opt}$  estimate and this would decrease decomposition rates as observed in Belyea  
(1996). In contrast, according to the the ModGberg model, a degree of saturation corresponding to the standard  $W_{opt}$  value  
( $0.45 L_{water} L_{pores}^{-1}$ ) is reached at shallower depths and in the same simulation with this standard  $W_{opt}$  value, no pronounced sub-  
535 surface peak in decomposition rates is observed (supporting Fig. S15). In hollows, the optimum degree of saturation suggested  
by HPM-leaching is reached near the surface for either  $W_{opt}$  value (supporting Fig. S15). Thus, a larger value for  $W_{opt}$  would  
be compatible with results from several previous studies.

Larger and smaller  $c_2$  than the standard value have been estimated for several peatland cores with the HPM and a modified  
version with monthly time step (Quillet et al., 2015; Treat et al., 2021, 2022). Smaller values have been estimated for tropical  
peatlands (Kurnianto et al., 2015). To our knowledge, no litterbag experiment directly estimated  $c_2$ . A difficulty is that available  
540 litterbag experiments cover only a comparatively small depth range below the water table level (at most around 30 cm, Fig.  
4) and therefore gradients in anaerobic decomposition rates across larger depths below the water table currently cannot be  
estimated with available litterbag data.

The estimates for the maximum possible decomposition rate ( $k_{0,i}$ ) have large errors and removal of data during the cross-  
validation caused larger relative differences in  $k_{0,i}$  estimates compared to  $W_{opt}$  and  $c_2$  (supporting Fig. S12). On the one hand,  
545 this variability indicates that available litterbag data are not sufficient to estimate  $k_{0,i}$  accurately and that our assignment of  
*Sphagnum* species to HPM PFT may not be optimal, but on the other hand, this variability may also indicate that categorizing  
*Sphagnum* species into three PFT may not accurately describe the variability of maximum possible decomposition rates. Several  
studies suggest that diverse aspects of litter chemistry may increase  $k_{0,i}$  (Turetsky et al., 2008; Bengtsson et al., 2018). However,  
we are not aware of studies that systematically analyze what factors control  $k_{0,i}$  within the same species.

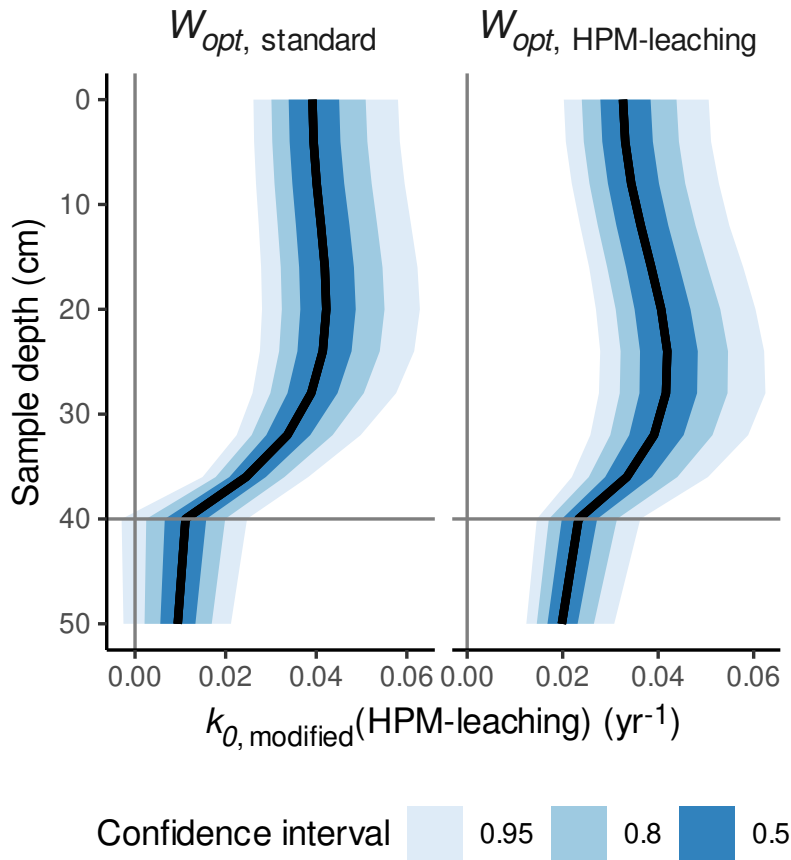

**Figure 7.** Decomposition rates predicted with HPM-leaching ( $k_{0,\text{modified}}(\text{HPM-leaching})$ ) for *S. fuscum* (hummocks), using either the standard value for  $W_{opt}$  or the  $W_{opt}$  value estimated by HPM-leaching versus depth of the litter below the peat surface. The horizontal line is the average water table depth. Shaded areas are central confidence intervals with probabilities given in the figure legend.

550 **4.2 Water table fluctuations may explain the discrepancies in  $c_2$  and  $W_{opt}$  and larger anaerobic and smaller aerobic decomposition rates.**

The HPM decomposition module predicts decomposition rates based on average annual water table depths (Frolking et al., 2010) and ignores water table fluctuations. Our evaluation of the HPM decomposition module also assumed an average water table depth during the litterbag experiments and the HPM decomposition module translated this into a clear pronounced  
 555 transition between anaerobic and aerobic decomposition rates (Fig. 4). In reality, water table levels fluctuate and this causes transient and nonlinear changes in decomposition rates due to variations in the availability of oxygen and other electron acceptors, flushing of end products of anaerobic decomposition, and possibly other factors (Siegel et al., 1995; Blodau and Moore, 2003; Blodau et al., 2004; Beer and Blodau, 2007; Knorr and Blodau, 2009; Walpen et al., 2018; Campeau et al.,



2021; Kim et al., 2021; Treat et al., 2022; Obradović et al., 2023). A possible explanation why the gradient in decomposition rates from oxic to anoxic decomposition is less steep across litterbag experiments, on average, than suggested by the standard HPM decomposition module could therefore be that an averaging effect of fluctuating water table levels on both aerobic and anaerobic decomposition rates is neglected by the HPM decomposition module. An additional factor may be that litterbags cover a depth range and therefore the decomposition rate estimate is an average over the depth covered by the litterbag. If moisture conditions vary over this depth, the decomposition rate estimate also averages over moisture conditions, with similar effects as the temporal average caused by water table fluctuations.

If this is the case,  $c_2$  would have to be re-interpreted as transition parameter that accounts for both limitation of anaerobic decomposition under anoxic conditions and the effects of periodically oxic conditions. Similarly,  $W_{opt}$  would have to be re-interpreted as the optimum average degree of saturation for decomposition under water table level variations and its value would be necessarily different from the optimum degree of saturation for depolymerization under static degree of saturation.

Adjusting the HPM decomposition module parameters as implied by our modified models may be an easy way to account for the effect of sub-annual variation in water table levels on decomposition rates, if the discrepancies are caused by fluctuating water tables and if the model is representative for different effects variations in water table level may have on decomposition rates (e.g., short-term fluctuations compared to seasonal water table variations compared to prolonged droughts). What we have not considered due to limited data is that  $c_2$  can be expected to depend on long-term changes in groundwater flow (e.g., Siegel et al., 1995) or site-specific differences in hydrology and other factors (e.g., Frolking et al., 2010; Treat et al., 2021, 2022). Therefore,  $c_2$  can be expected to differ between litterbag studies and our data only indicate that  $c_2$  is larger on average, whereas more research is necessary to estimate and understand site-specific controls of  $c_2$  and how a change in hydrology controls  $c_2$ . Similarly,  $W_{opt}$  may differ between sites and over time. It would be interesting to know whether litterbag experiments can quantify these controls and whether  $c_2$  estimated from litterbag experiments is generally larger in peatlands with larger water table fluctuations.

It is also worth mentioning that a modification of the HPM, HPM-Arctic (Treat et al., 2021), has a seasonally dynamic WTD and this modification may account for at least a part of the discrepancies we observed here. Unfortunately, most available litterbag data do not report WTD at sufficient temporal resolution to test whether standard HPM parameter values are more compatible with litterbag data when such seasonal variations in WTD are considered.

#### 4.3 Implications of the discrepancies in $W_{opt}$ , $c_2$ , and $k_{0,i}$ for long-term C accumulation

A larger  $c_2$  implies larger anaerobic decomposition and may thus indicate that the HPM decomposition module underestimates anaerobic decomposition rates. Previous global and local sensitivity analyses, where HPM parameter values were varied in broad ranges and environmental conditions were varied, identified  $c_2$  as influential for C accumulation in the HPM (Quillet et al., 2013a, b).

If  $c_2$  is varied within the range from the standard value (0.3 m) to the average posterior estimate from HPM-leaching (0.64 m), this would cause differences in predicted C accumulation of a maximum of ca. 20% in the sensitivity experiment of Quillet et al. (2013a) (depending on precipitation, Fig. 1 c in Quillet et al. (2013a)). If values are changed across the complete posterior

range compatible with litterbag data and if other HPM parameters would also be varied, the effect would be even larger (Fig. 2 c in Quillet et al. (2013a)).

595 Due to parameter interactions and feedbacks, an increase in anaerobic decomposition rates can result in smaller or larger C accumulation of the HPM, depending on environmental conditions (Quillet et al., 2013a). Small anaerobic decomposition may cause too rapid C accumulation resulting in a low water table level, a thick aerobic zone, and thus smaller overall C accumulation after a longer time. Larger anaerobic decomposition may result in higher water table levels and this can increase C accumulation in the long-term. Too large anaerobic decomposition decreases C accumulation (Quillet et al., 2013a).

600 A larger  $W_{opt}$  implies that the largest aerobic decomposition rates are reached under more saturated conditions.  $W_{opt}$  has not been identified as influential in a sensitivity analysis of the HPM (Quillet et al., 2013a), but as shown above, it contributes to the less steep decrease of decomposition rates from oxic to anoxic conditions. Importantly, since the HPM does not have a seasonally resolved water table depth, the two sensitivity analyses did not consider how seasonal variations of the water table depth may control long-term C accumulation, and consequently the re-interpreted  $W_{opt}$  may be more important to long-term C accumulation than previously assumed. In addition, HPM-leaching suggests an average  $W_{opt}$  value of  $0.57 L_{water} L_{pores}^{-1}$ , which is outside the range of values tested in Quillet et al. (2013a) (0.3 to  $0.5 L_{water} L_{pores}^{-1}$ ). This implies that the sensitivity of long-term C accumulation to  $W_{opt}$  has been evaluated over a too small range.

A larger  $k_{0,i}$  increases decomposition rates for a species and *Sphagnum*  $k_{0,i}$  are particularly relevant for many peatlands because the bulk of the peat is *Sphagnum* peat. In the sensitivity analysis in Quillet et al. (2013b),  $k_{0,hummock}$  had large interaction effects with other parameters of the HPM and therefore could either cause larger or smaller peat accumulation, depending on environmental conditions, other parameters, and what vegetation shifts occur in a specific case. Similar to  $W_{opt}$ , our  $k_{0,i}$  estimates have errors that are larger than the range of values tested in Quillet et al. (2013b). For example, for hummock *Sphagna*,  $k_{0,i}$  was varied from 0.04 to 0.06 yr<sup>-1</sup>, whereas average estimates for  $k_{0,i}$  of HPM-leaching for species assigned to the hummock PFT range from 0.04 to 0.19 yr<sup>-1</sup>. As mentioned above, this range of  $k_{0,i}$  estimates may be biased because of the difficulty to assign *Sphagnum* species to HPM PFT, but from a different perspective, this is an additional error source for  $k_{0,i}$  estimates that should be considered in sensitivity analyses unless more evidence becomes available to define PFT and their maximum possible decomposition rates.

615 A further aspect that needs to be considered is that HPM-all and HPM-leaching estimate parameter distributions based on available data, whereas existing studies defined fixed parameter values or ranges of parameter values based on expert knowledge. Based on Quillet et al. (2013a), the uncertainties would cause non-negligible differences in predicted long-term C accumulation. For example, values within the uncertainty range of  $c_2$  estimated by HPM-leaching ((0.4, 0.97), 95% confidence interval), would imply differences up to 100 kg m<sup>-2</sup> of accumulated C over 5000 years in some simulations (Fig. 1 (c) in Quillet et al. (2013a), with a maximum total accumulation of ca. 430 kg<sub>C</sub> m<sup>-2</sup>). Simulations of remaining masses for different *Sphagnum* species under different conditions also indicate large uncertainties in predicted remaining masses (supporting info S9). This implies that more work is required to estimate parameters accurately enough to detect even relative large differences among peatland models and between model predictions and peat cores.

Summarized, based on existing sensitivity analyses of the HPM the parameter discrepancies suggested by HPM-all and HPM-leaching can translate into non-negligible differences in long-term C accumulation rates. They also imply gaps in previous sensitivity analyses of the HPM, namely that  $W_{opt}$  and possibly  $k_{0,i}$  (for some species) have been analyzed over a too restricted value range and may play a more important role if water table fluctuations are taken into account.

#### 4.4 How can we improve tests of peatland decomposition modules?

We suggest the following steps to estimate peatland decomposition module parameters more accurately and therefore also to improve the accuracy of tests of peatland decomposition modules:

1. High temporal resolution measurements of WTD: For many available litterbag studies, it is not clear whether reported WTD estimates are unbiased estimates of average WTD (i.e., are derived from high-resolution measurements during the incubation) or biased (due to a too small temporal resolution or coverage). This limitation could be reduced by reporting high temporal resolution WTD measurements along litterbag experiments. Such data are also necessary to investigate whether HPM decomposition module parameters are controlled by WTD fluctuations.
2. Eliminate the need of auxiliary models to estimate the degree of saturation: There is a lack of data on the degree of saturation (or porosity and volumetric water content, from which the degree of saturation could be computed) for available litterbag experiments. For this reason, we used the modified Granberg model to estimate the degree of saturation based on reported WTD and an assumed peat porosity. The modified Granberg model, reported WTD, and our assumed peat porosity are error sources for our test. This limitation could be reduced by measurements of peat porosity and high temporal resolution measurements of volumetric water content during litterbag experiments.
3. Implementing a standard for how to assign *Sphagnum* species to model PFT: The HPM does not specify how to assign *Sphagnum* species to PFT (Frolking et al., 2010), which makes it difficult to compare litterbag experiments to parameters for HPM PFT. Ideally, peatland models should provide lists of species they assign to certain PFT to facilitate tests. Moreover, available niche data used here to assign species to PFT may be biased by short term measurements during summer that are not in line with average niches defined in peatland models, similar to how transfer model for testate amoebae are suggested to be biased (Swindles et al., 2015).
4. Decreasing errors in  $k_0$  and  $l_0$  estimates from litterbag experiments: Our analysis suggests that a comparatively large range of  $c_2$ ,  $W_{opt}$ , and  $k_{0,i}$  estimates in the HPM decomposition module are compatible with available litterbag data because errors in remaining masses are large enough to support a range of  $k_0$  and  $l_0$  estimates and because of deficiencies in the design of the litterbag experiments. As a consequence,  $k_0$  estimates of the litterbag decomposition model can be adjusted to fit predictions of the HPM decomposition module for a range of HPM decomposition module parameter values. We also assume that because of these large errors and a large variability of initial leaching losses due to differences in litter handling (Teickner et al., 2024b), we could not detect an expected positive relation of  $l_0$  to the degree of saturation

(Lind et al., 2022). Future litterbag experiments that aim to improve peatland models should reduce errors of  $k_0$  and  $l_0$  estimates (e.g., Teickner et al., 2024b).

- 660 5. Systematic litterbag experiments along the gradient from oxic to anoxic conditions: There are few litterbag experiments available that systematically analyze how decomposition rates differ along the gradient from oxic to anoxic conditions. Problems are that many studies test only few conditions and do not cover depth ranges large enough to estimate the minimum decomposition rate ( $f_{min}$ ) and  $c_2$ . An ideal study would use litter material of the same species and origin (thus making sure  $k_{0,i}$  would be the same for all replicates) and systematically record remaining masses under different degrees
- 665 of saturation in the same peat material to accurately estimate  $W_{opt}$  and  $c_1$ . Another ideal study would systematically record remaining masses at many depth levels, and deeper than 30 cm below the average annual WTD to allow accurate estimation of  $c_2$ . Similar experiments could be used to estimate how WTD fluctuations affect decomposition rates along the gradient from oxic to anoxic conditions and how this would change estimates for  $W_{opt}$  and  $c_2$ .
- 670 6. Understanding the controls of  $k_{0,i}$ : Values of  $k_{0,i}$  can be assumed to be controlled, among other factors, by litter chemistry. Even though there are studies that analyze how litter chemistry controls decomposition rates (e.g., Turetsky et al., 2008), there are few that do this systematically (e.g., Bengtsson et al., 2018) and these do not consider initial leaching losses and thus may confound initial leaching and decomposition, both of which may depend on initial litter chemistry. Studies that systematically change litter chemistry within species would be required to estimate  $k_{0,i}$ . These estimates would also be useful to define PFT for decomposition modules.
- 675 7. Understanding how  $c_2$  and  $W_{opt}$  vary between sites and in dependency of peat characteristics: Too few litterbag experiments with too few replicates are available to estimate  $c_2$  and  $W_{opt}$  separately for individual sites (or how they may vary over time). Systematic litterbag experiments are needed to estimate how environmental conditions control the magnitude of these parameters, for example due to temporal variations in water and oxygen availability or differences in availability of alternative electron acceptors under anoxic conditions.
- 680 Systematic and high-quality litterbag experiments that are designed specifically to test peatland decomposition modules are required to achieve these improvements. To support the design of such experiments, we created an R package (hpmddpredict, supporting information S10) that allows to make predictions with HPM-leaching for hypothetical litterbag experiments and that also allows to change parameter values (Teickner and Knorr, 2024a). This could for example be useful to estimate the sample sizes that are required to detect specific differences in remaining masses, to test to what extent litterbag experiments
- 685 are compatible with HPM-leaching, or to analyze the effect of changing HPM decomposition module parameter values from the standard values or our estimates.

## 5 Conclusions

Based on the litterbag data, the degree of saturation where decomposition is largest ( $W_{opt}$ ) and the anoxia scale length ( $c_2$ , controls how fast decomposition rates decrease below the average annual WTD) are significantly larger than the standard

690 parameter values. Moreover, maximum possible decomposition rates ( $k_{0,i}$ ) for individual species are overall more variable than implied by the standard HPM decomposition module parameter values. According to previous sensitivity analyses, these parameter estimates imply differences in predicted C accumulation rates of up to  $100 \text{ kg}_C \text{ m}^{-2}$  over 5000 years (with a maximum total C accumulation of ca.  $430 \text{ kg}_C \text{ m}^{-2}$ ) when compared to the standard parameter values. The differences in HPM parameter estimates imply larger anaerobic decomposition rates for several species and a less steep gradient of decomposition  
695 rates from oxic to anoxic conditions. This pattern may be caused by water table fluctuations, differences in groundwater flow, or spatial averaging in litterbag experiments; factors that are currently not explicitly considered both in the HPM decomposition module and available litterbag experiments.

Our analysis suggests that the HPM decomposition module with standard parameter values fits available *Sphagnum* litterbag data, but model versions where HPM decomposition module parameters were estimated from available litterbag data have  
700 an equivalent fit. This is caused by two mechanisms: First, remaining masses in litterbag experiments can be explained by initial leaching losses and decomposition. If remaining masses are reported only some time after the initial leaching loss has happened, they can be explained either by small initial leaching losses and a large decomposition rate or by large initial leaching losses and a smaller decomposition rate. Second, the majority of available *Sphagnum* litterbag experiments reports remaining masses only a long time after the initial leaching loss happened. Taken together, this means that available litterbag  
705 data are compatible with a broad range of decomposition rates suggested by HPM decomposition module versions with large differences in parameter values. Improved litterbag experiments are needed for more accurate tests of any peatland decomposition module and for obtaining parameter estimates accurate enough to allow even only approximate predictions of long-term peat accumulation. Applications of the HPM and any other peatland model that relies on litterbag data to parameterize its decomposition process should consider that a broad range of decomposition module parameter values is  
710 compatible with available litterbag experiments.

The modeling approach used here can be combined with different data sources and peatland decomposition modules and therefore may serve as blueprint for future tests and to obtain more accurate parameter estimates once improved litterbag experiments are available. In light of the large differences in long-term peat accumulation suggested by the parameter estimates, we conclude that it is worth to conduct such litterbag experiments, not only to improve the decomposition module of the HPM,  
715 but to improve peatland models in general.

. Data and code to reproduce this manuscript are available from Teickner et al. (2024a). The data used in this study are derived from Teickner and Knorr (2024b). An R package to make predictions for litterbag experiments with model HPM-leaching is available from Teickner and Knorr (2024a).

720 . HT: Conceptualization, methodology, software, validation, formal analysis, investigation, data curation, writing - original draft, visualization, project administration. EP: supervision, funding acquisition, writing - review & editing. KHK: supervision, funding acquisition, writing - review & editing.

. The authors declare no competing interests.

. This study was funded by the Deutsche Forschungsgemeinschaft (DFG, German Research Foundation) grant no. KN 929/23-1 to Klaus-Holger Knorr and grant no. PE 1632/18-1 to Edzer Pebesma.

725 **References**

- Asada, T. and Warner, B. G.: Surface Peat Mass and Carbon Balance in a Hypermaritime Peatland, *Soil Science Society of America Journal*, 69, 549–562, <https://doi.org/10.2136/sssaj2005.0549>, 2005.
- Bartsch, I. and Moore, T. R.: A Preliminary Investigation of Primary Production and Decomposition in Four Peatlands near Schefferville, Québec, *Canadian Journal of Botany*, 63, 1241–1248, <https://doi.org/10.1139/b85-171>, 1985.
- 730 Bauer, I. E.: Modelling Effects of Litter Quality and Environment on Peat Accumulation over Different Time-Scales: Peat Accumulation over Different Time-Scales, *Journal of Ecology*, 92, 661–674, <https://doi.org/10.1111/j.0022-0477.2004.00905.x>, 2004.
- Beer, J. and Blodau, C.: Transport and Thermodynamics Constrain Belowground Carbon Turnover in a Northern Peatland, *Geochimica et Cosmochimica Acta*, 71, 2989–3002, <https://doi.org/10.1016/j.gca.2007.03.010>, 2007.
- Belyea, L. R.: Separating the Effects of Litter Quality and Microenvironment on Decomposition Rates in a Patterned Peatland, *Oikos*, 77, 735 529–539, <https://doi.org/10.2307/3545942>, 1996.
- Bengtsson, F., Rydin, H., and Hájek, T.: Biochemical Determinants of Litter Quality in 15 Species of *Sphagnum*, *Plant and Soil*, 425, 161–176, <https://doi.org/10.1007/s11104-018-3579-8>, 2018.
- Blodau, C. and Moore, T. R.: Experimental Response of Peatland Carbon Dynamics to a Water Table Fluctuation, *Aquatic Sciences - Research Across Boundaries*, 65, 47–62, <https://doi.org/10.1007/s000270300004>, 2003.
- 740 Blodau, C., Basiliko, N., and Moore, T. R.: Carbon Turnover in Peatland Mesocosms Exposed to Different Water Table Levels, *Biogeochemistry*, 67, 331–351, <https://doi.org/10.1023/B: BIOG.0000015788.30164.e2>, 2004.
- Bona, K. A., Hilger, A., Burgess, M., Wozney, N., and Shaw, C.: A Peatland Productivity and Decomposition Parameter Database, *Ecology*, 99, 2406–2406, <https://doi.org/10.1002/ecy.2462>, 2018.
- Bona, K. A., Shaw, C., Thompson, D. K., Hararuk, O., Webster, K., Zhang, G., Voicu, M., and Kurz, W. A.: The Canadian Model 745 for Peatlands (CaMP): A Peatland Carbon Model for National Greenhouse Gas Reporting, *Ecological Modelling*, 431, 109–164, <https://doi.org/10.1016/j.ecolmodel.2020.109164>, 2020.
- Breeuwer, A., Heijmans, M., Robroek, B. J. M., Limpens, J., and Berendse, F.: The Effect of Increased Temperature and Nitrogen Deposition on Decomposition in Bogs, *Oikos*, 117, 1258–1268, <https://doi.org/10.1111/j.0030-1299.2008.16518.x>, 2008.
- Campeau, A., Vachon, D., Bishop, K., Nilsson, M. B., and Wallin, M. B.: Autumn Destabilization of Deep Porewater CO<sub>2</sub> Store in a Northern 750 Peatland Driven by Turbulent Diffusion, *Nature Communications*, 12, 6857, <https://doi.org/10.1038/s41467-021-27059-0>, 2021.
- Chaudhary, N., Miller, P. A., and Smith, B.: Biotic and Abiotic Drivers of Peatland Growth and Microtopography: A Model Demonstration, *Ecosystems*, 21, 1196–1214, <https://doi.org/10.1007/s10021-017-0213-1>, 2018.
- Clymo, R. S., Turunen, J., and Tolonen, K.: Carbon Accumulation in Peatland, *Oikos*, 81, 368–388, <https://doi.org/10.2307/3547057>, 1998.
- Frolking, S., Roulet, N. T., Moore, T. R., Richard, P. J. H., Lavoie, M., and Muller, S. D.: Modeling Northern Peatland Decomposition and 755 Peat Accumulation, *Ecosystems*, 4, 479–498, <https://doi.org/10.1007/s10021-001-0105-1>, 2001.
- Frolking, S., Roulet, N. T., Tuittila, E., Bubier, J. L., Quillet, A., Talbot, J., and Richard, P. J. H.: A New Model of Holocene Peatland Net Primary Production, Decomposition, Water Balance, and Peat Accumulation, *Earth System Dynamics*, 1, 1–21, <https://doi.org/10.5194/esd-1-1-2010>, 2010.
- Frolking, S., Talbot, J., Jones, M. C., Treat, C. C., Kauffman, J. B., Tuittila, E.-S., and Roulet, N.: Peatlands in the Earth's 21st Century 760 Climate System, *Environmental Reviews*, 19, 371–396, <https://doi.org/10.1139/a11-014>, 2011.

- Gelman, A., Carlin, J., Stern, H., Dunson, D., Vehtari, A., and Rubin, D. B.: Bayesian Data Analysis, Chapman & Hall/CRC Texts in Statistical Science, CRC Press, Boca Raton, third edition edn., ISBN 978-1-4398-4095-5, 2014.
- Golovatskaya, E. A. and Nikonova, L. G.: The Influence of the Bog Water Level on the Transformation of Sphagnum Mosses in Peat Soils of Oligotrophic Bogs, *Eurasian Soil Science*, 50, 580–588, <https://doi.org/10.1134/S1064229317030036>, 2017.
- 765 Granberg, G., Grip, H., Löfvenius, M. O., Sundh, I., Svensson, B. H., and Nilsson, M.: A Simple Model for Simulation of Water Content, Soil Frost, and Soil Temperatures in Boreal Mixed Mires, *Water Resources Research*, 35, 3771–3782, <https://doi.org/10.1029/1999WR900216>, 1999.
- Hagemann, U. and Moroni, M. T.: Moss and Lichen Decomposition in Old-Growth and Harvested High-Boreal Forests Estimated Using the Litterbag and Minicontainer Methods, *Soil Biology and Biochemistry*, 87, 10–24, <https://doi.org/10.1016/j.soilbio.2015.04.002>, 2015.
- 770 Hassel, K., Kyrkjeeide, M. O., Yousefi, N., Prestø, T., Stenøien, H. K., Shaw, J. A., and Flatberg, K. I.: *Sphagnum Divinum* (*Sp. Nov.*) and *S. Medium* Limpr. and Their Relationship to *S. Magellanicum* Brid., *Journal of Bryology*, 40, 197–222, <https://doi.org/10.1080/03736687.2018.1474424>, 2018.
- Hayward, P. M. and Clymo, R. S.: Profiles of Water Content and Pore Size in *Sphagnum* and Peat, and Their Relation to Peat Bog Ecology, *Proceedings of the Royal Society of London. Series B, Biological Sciences*, 215, 299–325, 1982.
- 775 Heijmans, M. M., Mauquoy, D., Van Geel, B., and Berendse, F.: Long-term Effects of Climate Change on Vegetation and Carbon Dynamics in Peat Bogs, *Journal of Vegetation Science*, 19, 307–320, <https://doi.org/10.3170/2008-8-18368>, 2008.
- Heinemeyer, A., Croft, S., Garnett, M. H., Gloor, E., Holden, J., Lomas, M. R., and Ineson, P.: The MILLENNIA Peat Cohort Model: Predicting Past, Present and Future Soil Carbon Budgets and Fluxes under Changing Climates in Peatlands, *Climate Research*, 45, 207–226, <https://doi.org/10.3354/cr00928>, 2010.
- 780 Hoffman, M. D. and Gelman, A.: The No-U-turn Sampler: Adaptively Setting Path Lengths in Hamiltonian Monte Carlo, *Journal of Machine Learning Research*, 15, 1593–1623, 2014.
- Johnson, L. C. and Damman, A. W. H.: Species-Controlled *Sphagnum* Decay on a South Swedish Raised Bog, *Oikos*, 61, 234, <https://doi.org/10.2307/3545341>, 1991.
- Johnson, M. G., Granath, G., Tahvanainen, T., Pouliot, R., Stenøien, H. K., Rochefort, L., Rydin, H., and Shaw, A. J.: Evolution of Niche Preference in *Sphagnum* Peat Mosses, *Evolution*, 69, 90–103, <https://doi.org/10.1111/evo.12547>, 2015.
- 785 Kallioinen, N., Paananen, T., Bürkner, P.-C., and Vehtari, A.: Detecting and Diagnosing Prior and Likelihood Sensitivity with Power-Scaling, *Statistics and Computing*, 34, 57, <https://doi.org/10.1007/s11222-023-10366-5>, 2024.
- Kettridge, N. and Baird, A.: In Situ Measurements of the Thermal Properties of a Northern Peatland: Implications for Peatland Temperature Models, *Journal of Geophysical Research: Earth Surface*, 112, <https://doi.org/10.1029/2006JF000655>, 2007.
- 790 Kim, J., Rochefort, L., Hogue-Hugron, S., Alqulaiti, Z., Dunn, C., Pouliot, R., Jones, T. G., Freeman, C., and Kang, H.: Water Table Fluctuation in Peatlands Facilitates Fungal Proliferation, Impedes *Sphagnum* Growth and Accelerates Decomposition, *Frontiers in Earth Science*, 8, 9, 2021.
- Knorr, K.-H. and Blodau, C.: Impact of Experimental Drought and Rewetting on Redox Transformations and Methanogenesis in Mesocosms of a Northern Fen Soil, *Soil Biology and Biochemistry*, 41, 1187–1198, <https://doi.org/10.1016/j.soilbio.2009.02.030>, 2009.
- 795 Kurnianto, S., Warren, M., Talbot, J., Kauffman, B., Murdiyarso, D., and Frohling, S.: Carbon Accumulation of Tropical Peatlands over Millennia: A Modeling Approach, *Global Change Biology*, 21, 431–444, <https://doi.org/10.1111/gcb.12672>, 2015.
- Lind, L., Harbicht, A., Bergman, E., Edwartz, J., and Eckstein, R. L.: Effects of Initial Leaching for Estimates of Mass Loss and Microbial Decomposition—Call for an Increased Nuance, *Ecology and Evolution*, 12, <https://doi.org/10.1002/ece3.9118>, 2022.



- Liu, H. and Lennartz, B.: Hydraulic Properties of Peat Soils along a Bulk Density Gradient-A Meta Study, *Hydrological Processes*, 33, 800 101–114, <https://doi.org/10.1002/hyp.13314>, 2019.
- Loisel, J., van Bellen, S., Pelletier, L., Talbot, J., Hugelius, G., Karran, D., Yu, Z., Nichols, J., and Holmquist, J.: Insights and Issues with Estimating Northern Peatland Carbon Stocks and Fluxes since the Last Glacial Maximum, *Earth-Science Reviews*, 165, 59–80, <https://doi.org/10.1016/j.earscirev.2016.12.001>, 2017.
- Mäkilä, M., Säävuori, H., Grundström, A., and Suomi, T.: *Sphagnum* Decay Patterns and Bog Microtopography in South-Eastern Finland, 805 Mires and Peat, pp. 1–12, <https://doi.org/10.19189/MaP.2017.OMB.283>, 2018.
- Morris, P. J., Baird, A. J., and Belyea, L. R.: The DigiBog Peatland Development Model 2: Ecohydrological Simulations in 2D, *Ecohydrology*, 5, 256–268, <https://doi.org/10.1002/eco.229>, 2012.
- Moyano, F. E., Manzoni, S., and Chenu, C.: Responses of Soil Heterotrophic Respiration to Moisture Availability: An Exploration of Processes and Models, *Soil Biology and Biochemistry*, 59, 72–85, <https://doi.org/10.1016/j.soilbio.2013.01.002>, 2013.
- 810 Nichols, J. E. and Peteet, D. M.: Rapid Expansion of Northern Peatlands and Doubled Estimate of Carbon Storage, *Nature Geoscience*, 12, 917–921, <https://doi.org/10.1038/s41561-019-0454-z>, 2019.
- Obradović, N., Joshi, P., Arn, S., Aeppli, M., Schroth, M. H., and Sander, M.: Reoxidation of Reduced Peat Organic Matter by Dissolved Oxygen: Combined Laboratory Column-breakthrough Experiments and In-field Push-pull Tests, *Journal of Geophysical Research: Biogeosciences*, 128, e2023JG007 640, <https://doi.org/10.1029/2023JG007640>, 2023.
- 815 Prevost, M., Belleau, P., and Plamondon, A. P.: Substrate Conditions in a Treed Peatland: Responses to Drainage, *Écoscience*, 4, 543–554, <https://doi.org/10.1080/11956860.1997.11682434>, 1997.
- Quillet, A., Frohling, S., Garneau, M., Talbot, J., and Peng, C.: Assessing the Role of Parameter Interactions in the Sensitivity Analysis of a Model of Peatland Dynamics, *Ecological Modelling*, 248, 30–40, <https://doi.org/10.1016/j.ecolmodel.2012.08.023>, 2013a.
- Quillet, A., Garneau, M., and Frohling, S.: Sobol' Sensitivity Analysis of the Holocene Peat Model: What Drives Carbon Accumulation in 820 Peatlands?, *Journal of Geophysical Research: Biogeosciences*, 118, 203–214, <https://doi.org/10.1029/2012JG002092>, 2013b.
- Quillet, A., Garneau, M., Van Bellen, S., Frohling, S., and Tuittila, E.-S.: Integration of Palaeohydrological Proxies into a Peatland Model: A New Tool for Palaeoecological Studies, *Ecohydrology*, 8, 214–229, <https://doi.org/10.1002/eco.1501>, 2015.
- R Core Team: R: A Language and Environment for Statistical Computing, Vienna, Austria, 2022.
- Rydin, H., Jeglum, J. K., and Bennett, K. D.: *The Biology of Peatlands, Biology of Habitats*, Oxford University Press, Oxford, 2nd ed edn., 825 ISBN 978-0-19-960299-5 978-0-19-960300-8, 2013.
- Scheffer, R. A., Van Logtestijn, R. S. P., and Verhoeven, J. T. A.: Decomposition of *Carex* and *Sphagnum* Litter in Two Mesotrophic Fens Differing in Dominant Plant Species, *Oikos*, 92, 44–54, <https://doi.org/10.1034/j.1600-0706.2001.920106.x>, 2001.
- Siegel, D. I., Reeve, A. S., Glaser, P. H., and Romanowicz, E. A.: Climate-Driven Flushing of Pore Water in Peatlands, *Nature*, 374, 531–533, <https://doi.org/10.1038/374531a0>, 1995.
- 830 Stan Development Team: Stan Modeling Language Users Guide and Reference Manual, 2021a.
- Stan Development Team: RStan: The R Interface to Stan, 2021b.
- Straková, P., Anttila, J., Spetz, P., Kitunen, V., Tapanila, T., and Laiho, R.: Litter Quality and Its Response to Water Level Drawdown in Boreal Peatlands at Plant Species and Community Level, *Plant and Soil*, 335, 501–520, <https://doi.org/10.1007/s11104-010-0447-6>, 2010.
- Swindles, G. T., Holden, J., Raby, C. L., Turner, T. E., Blundell, A., Charman, D. J., Menberu, M. W., and Kløve, B.: Testing Peatland 835 Water-Table Depth Transfer Functions Using High-Resolution Hydrological Monitoring Data, *Quaternary Science Reviews*, 120, 107–117, <https://doi.org/10.1016/j.quascirev.2015.04.019>, 2015.

- Szumigalski, A. R. and Bayley, S. E.: Decomposition along a Bog to Rich Fen Gradient in Central Alberta, Canada, *Canadian Journal of Botany*, 74, 573–581, <https://doi.org/10.1139/b96-073>, 1996.
- 840 Teickner, H. and Knorr, K.-H.: hpmddpredict: Predictions with Model HPMe-LE-peat-10 from Teickner et al. (2024), Zenodo, <https://doi.org/10.5281/ZENODO.11339733>, 2024a.
- Teickner, H. and Knorr, K.-H.: Peatland Decomposition Database (1.0.0), <https://doi.org/10.5281/ZENODO.11276065>, 2024b.
- Teickner, H., Pebesma, E., and Knorr, K.-H.: Compendium of R Code and Data for "A Synthesis of *Sphagnum* Litterbag Experiments: Initial Leaching Losses Bias Decomposition Rate Estimates" and "Underestimation of Anaerobic Decomposition Rates in *Sphagnum* Litterbag Experiments by the Holocene Peatland Model Depends on Initial Leaching Losses", Zenodo, <https://doi.org/10.5281/ZENODO.11472955>, 845 2024a.
- Teickner, H., Pebesma, E., and Knorr, K.-H.: A Synthesis of *Sphagnum* Litterbag Experiments: Initial Leaching Losses Bias Decomposition Rate Estimates, <https://doi.org/10.5194/egusphere-2024-1686>, 2024b.
- Thormann, M. N., Bayley, S. E., and Currah, R. S.: Comparison of Decomposition of Belowground and Aboveground Plant Litters in Peatlands of Boreal Alberta, Canada, *Canadian Journal of Botany*, 79, 9–22, <https://doi.org/10.1139/b00-138>, 2001.
- 850 Treat, C. C., Jones, M. C., Alder, J., Sannel, A. B. K., Camill, P., and Frohling, S.: Predicted Vulnerability of Carbon in Permafrost Peatlands with Future Climate Change and Permafrost Thaw in Western Canada, *Journal of Geophysical Research: Biogeosciences*, 126, e2020JG005872, <https://doi.org/10.1029/2020JG005872>, 2021.
- Treat, C. C., Jones, M. C., Alder, J., and Frohling, S.: Hydrologic Controls on Peat Permafrost and Carbon Processes: New Insights from Past and Future Modeling, *Frontiers in Environmental Science*, 10, 892925, <https://doi.org/10.3389/fenvs.2022.892925>, 2022.
- 855 Trinder, C. J., Johnson, D., and Artz, R. R.: Interactions among Fungal Community Structure, Litter Decomposition and Depth of Water Table in a Cutover Peatland, *FEMS Microbiology Ecology*, 64, 433–448, <https://doi.org/10.1111/j.1574-6941.2008.00487.x>, 2008.
- Tuittila, E.-S., Juutinen, S., Frohling, S., Välijärvi, M., Laine, A. M., Miettinen, A., Seväkivi, M.-L., Quillet, A., and Merilä, P.: Wetland Chronosequence as a Model of Peatland Development: Vegetation Succession, Peat and Carbon Accumulation, *The Holocene*, 23, 25–35, <https://doi.org/10.1177/0959683612450197>, 2013.
- 860 Turetsky, M. R., Crow, S. E., Evans, R. J., Vitt, D. H., and Wieder, R. K.: Trade-Offs in Resource Allocation among Moss Species Control Decomposition in Boreal Peatlands, *Journal of Ecology*, 96, 1297–1305, <https://doi.org/10.1111/j.1365-2745.2008.01438.x>, 2008.
- van Breemen, N.: How *Sphagnum* Bogs down Other Plants, p. 6, 1995.
- Vehtari, A., Gelman, A., Simpson, D., Carpenter, B., and Bürkner, P.-C.: Rank-Normalization, Folding, and Localization: An Improved R<sup>^</sup> for Assessing Convergence of MCMC (with Discussion), *Bayesian Analysis*, 16, <https://doi.org/10.1214/20-BA1221>, 2021.
- 865 Vitt, D. H.: Growth and Production Dynamics of Boreal Mosses over Climatic, Chemical and Topographic Gradients, *Botanical Journal of the Linnean Society*, 104, 35–59, <https://doi.org/10.1111/j.1095-8339.1990.tb02210.x>, 1990.
- Walpen, N., Lau, M. P., Fiskal, A., Getzinger, G. J., Meyer, S. A., Nelson, T. F., Lever, M. A., Schroth, M. H., and Sander, M.: Oxidation of Reduced Peat Particulate Organic Matter by Dissolved Oxygen: Quantification of Apparent Rate Constants in the Field, *Environmental Science & Technology*, 52, 11151–11160, <https://doi.org/10.1021/acs.est.8b03419>, 2018.
- 870 Yu, Z., Turetsky, M., Campbell, I., and Vitt, D.: Modelling Long-Term Peatland Dynamics. II. Processes and Rates as Inferred from Litter and Peat-Core Data, *Ecological Modelling*, 145, 159–173, [https://doi.org/10.1016/S0304-3800\(01\)00387-8](https://doi.org/10.1016/S0304-3800(01)00387-8), 2001.
- Yu, Z. C.: Northern Peatland Carbon Stocks and Dynamics: A Review, *Biogeosciences*, 9, 4071–4085, <https://doi.org/10.5194/bg-9-4071-2012>, 2012.

Zhao, B., Zhuang, Q., Treat, C., and Frohking, S.: A Model Intercomparison Analysis for Controls on C Accumulation in North American Peatlands, *Journal of Geophysical Research: Biogeosciences*, <https://doi.org/10.1029/2021JG006762>, 2022.
