# Supplementary material for: Underestimation of Anaerobic Decomposition Rates in Sphagnum Litterbag Experiments by the Holocene Peatland Model Depends on Initial Leaching Losses
Source: Copernicus journal article supplement (doi:10.5194/egusphere-2024-1739), 2024-06-26
Supplement: Supplementary file [file egusphere-2024-1739-AC4-supplement.zip]

# ~~Underestimation~~ Peat Oxic and Anoxic Controls of ~~Anaerobic~~ *Sphagnum* Decomposition Rates in ~~*Sphagnum*~~ Litterbag Experiments by the Holocene Peatland Model ~~Depends on Initial Leaching Losses~~ Decomposition Module Estimated from Litterbag Data

Henning Teickner<sup>1, 2</sup>, Edzer Pebesma<sup>2</sup>, and Klaus-Holger Knorr<sup>1</sup>

<sup>1</sup>Ecohydrology & Biogeochemistry Group, Institute of Landscape Ecology, University of Münster, 48149, Germany

<sup>2</sup>Spatiotemporal Modelling Lab, Institute for Geoinformatics, University of Münster, 48149, Germany

**Correspondence:** Henning Teickner (henning.teickner@uni-muenster.de)

**Abstract.** The Holocene Peatland Model (HPM) is a widely applied model to understand and predict long-term peat accumulation. ~~Here, we test whether the HPM can predict decomposition of available *Sphagnum* litterbag data along a gradient from oxic to anoxic conditions and~~, but it is difficult to test due to its complexity, measurement errors, and lack of data. Instead of testing the complete model, tests of individual modules may avoid some of these problems. In particular, the HPM decomposition module can be tested with litterbag data, but no such test has been conducted yet.

Here, we estimate parameter values ~~from the litterbag data. Large uncertainties in available litterbag data allow predictions of~~ the HPM ~~to fit decomposition rates estimated from litterbags by adjusting decomposition module from available *Sphagnum* litterbag experiments included in the Peatland Decomposition Database and with a litterbag decomposition model that considers initial leaching losses and decomposition rates estimated from the litterbag data within the range of their uncertainties. Specifically,~~ with. Using either these estimates or the standard parameter values, the HPM assumes larger initial leaching losses and smaller decomposition rates than estimated from the litterbag data alone. Therefore, improved tests of the HPM rely on future litterbag experiments that allow a more accurate estimation of initial leaching losses and decomposition rates. ~~we test whether the HPM decomposition module fits decomposition rates ( $k_0$ ) in *Sphagnum* litterbag experiments along a gradient from oxic to anoxic conditions.~~

When estimating HPM parameters from the litterbag data and assuming smaller initial leaching losses, our analysis indicates that the HPM with standard parameter values underestimates anaerobic decomposition rates for several species and assumes a too steep decrease. Both Litterbag data and model versions where HPM decomposition module parameters were estimated suggest a less steep gradient of decomposition rates from oxic to anoxic conditions. ~~This and larger anaerobic decomposition rates for several species than the standard parameter values. This discrepancy~~ may be caused by ~~not considering ignoring ef-~~fects of water table fluctuations on aerobic and anaerobic decomposition rates. ~~Whether the discrepancies are reproducible and the estimated parameter values may be an easy fix to account for effects of water table fluctuations in long-term predictions needs further investigation~~ Moreover, our analysis suggests that maximum possible decomposition rates of individual species

$(k_{0,i})$  vary more than suggested by the standard parameter values of the HPM plant functional types. Based on previous sensitivity analyses of the HPM, the ~~updated parameter estimates~~ estimated differences to the standard parameter values can cause differences in predicted 5000 year C accumulation up to  $100 \text{ kg m}^{-2}$ .

The HPM decomposition module with standard parameter values fits  $k_0$  estimated from *Sphagnum* litterbag data, but model versions where HPM decomposition module parameters were estimated and differ significantly have an equivalent fit. The reason why models with different parameter values have equivalent fit is that errors in remaining masses and the design of available litterbag experiments support a range of initial leaching loss and  $k_0$  estimates. Consequently, applications of the HPM and any other peatland model should consider that a broad range of decomposition module parameter values is compatible with available litterbag experiments.

Improved litterbag experiments are needed for more accurate tests of any peatland decomposition module and for obtaining parameter estimates accurate enough to allow even only approximate predictions of long-term peat accumulation. The modeling approach used here can be combined with different data sources (for example measured degree of saturation) and decomposition modules. In light of the large differences in long-term peat accumulation suggested by the parameter estimates, we conclude that it is worth to conduct such experiments, not only to improve the decomposition module of the HPM, but to improve peatland models in general.

## 1 Introduction

Decomposition is one of the major controls of how much carbon (C) peatlands can store. Compared to other ecosystems, northern peatlands usually have small decomposition rates because of cold temperatures, high water table levels, acidic pH value, and litter that does not decompose fast even under ~~more conditions facilitating microbial~~ environmental conditions favorable for decomposition (van Breemen, 1995; Rydin et al., 2013). These slow decomposition rates caused northern peatlands to accumulate at least 400 Gt C (Yu, 2012; Nichols and Peteet, 2019) during the Holocene and changes in the controls of decomposition rates may cause them to loose considerable amounts of C to the atmosphere under climate and land use changes (Frolking et al., 2011; Loisel et al., 2017).

Peatland models are used to better understand past C accumulation and to predict future changes in peat C stocks, but because of the long time scales which have to be considered, they are difficult to test.

~~How to test long-term peatland models is an open problem.~~ Past studies have compared site-adapted simulations of peat height, age, C and N stocks, macrofossil composition, and water table level predicted by peatland models against peat core data (e.g., Frolking et al. (2010), Tuittila et al. (2013), Treat et al. (2021), Zhao et al. (2022)) (e.g., Frolking et al., 2010; Tuittila et al., 2013; Treat et al., 2021), and have shown that existing peatland models can reproduce observed patterns to some extent.

~~These~~ However, these tests suffer from two problems. First, they ~~test entire peatland models against observed data and thus can not reliably~~ identify the parameter values or model equations that cause ~~observed discrepancies less reliably~~ discrepancies between model predictions and measurements because they test entire peatland models against observed data. Second, there often are large uncertainties on both sides of the test; peatland models have large uncertainties in parameter values and

model structure and these may produce a range of predictions as illustrated by uncertainty analyses (~~e.g., Quillet et al. (2013a), Quillet et al. (2013b)~~) (e.g., Quillet et al., 2013a, Quillet et al. (2013b)) and model intercomparisons (~~e.g., Zhao et al. (2022)~~) (e.g., Zhao et al., 2022). Observed data also has uncertainty from measurements, peat dating, or simply missing data, for example for past precipitation. Large uncertainties can make tests inconclusive, no matter how much data we use. ~~An alternative~~  
60 ~~which~~ As a consequence, there remains large and often not quantified uncertainty about parameter values that control decomposition rates.

An alternative that avoids some of these problems is to test only some part of a model while taking into account relevant uncertainty sources.

~~Such~~ To estimate uncertainties in and test values of parameters that directly control decomposition rates, such a test could  
65 address the decomposition module of a peatland model. For example, in the Holocene Peatland Model (HPM) (Frolking et al., 2010), we only need to know litter species, peat ~~water content, peat porosity~~ degree of saturation, the depth of the litter below the peat surface, water table depth, and only five parameters to predict decomposition rates. The predictions can be compared to decomposition rates estimated from litterbag data and therefore future litterbag studies can directly test whether discrepancies ~~are replicable and identify the factors causing the discrepancies~~ identified in such a test are replicable. Admittedly, such a  
70 test is restricted to short time ranges and not representative for long-term decomposition rates which may differ from that of fresh litter (e.g., Frolking et al., 2001), but future tests with different scope and applications of the model will benefit from the reduced parameter uncertainties and can consider where the model fails already on short time scales.

A test of decomposition modules is relevant because of the importance of decomposition for long-term C accumulation in peatlands. Previous sensitivity analyses of the HPM and applications to peat cores suggest that the anoxia scale length ( $c_2$ ), the  
75 parameter controlling how anaerobic decomposition rates are limited by electron acceptor depletion and accumulation of decomposition products, can result in a doubling of accumulated C, depending on climate conditions (~~Quillet et al., 2013b; Kurnianto et al., 2015~~) (Frolking et al., 2010; Quillet et al., 2013b; Kurnianto et al., 2015). These sensitivity analyses used assumed parameter ranges that are not informed by litterbag experiments. A test of only the HPM decomposition module can provide better estimates for  $c_2$  and may therefore help to reduce uncertainties in predicted C accumulation rates.

80 Currently, litterbag experiments are not as extensively used for testing peatland models as they could and only a fraction of the information available from litterbag experiments is used to develop models. The HPM ~~uses litterbag data to define average~~ derives initial decomposition rates of moss plant functional types from litterbag data, but parameters for environmental controls of decomposition are assumptions which appear to be informed at most qualitatively by litterbag experiments, and it is not tested whether the HPM decomposition module successfully fits available litterbag data (Frolking et al., 2010). This is  
85 also the case for other dynamic peatland models, e.g. Frolking et al. (2001), Bauer (2004), Heijmans et al. (2008), Heinemeyer et al. (2010), Morris et al. (2012), Chaudhary et al. (2018), Bona et al. (2020).

One reason why such tests have been difficult is that suitable litterbag raw data to test peatland models are scarce. Bona et al. (2018) developed a Peatland Productivity and Decomposition Parameter Database, but it contains only data from studies older than 2010 and no error estimates for remaining masses in litterbag data. Since decomposition rates have been estimated with  
90 different litterbag decomposition models in previous studies, their values are not directly comparable ~~and therefore raw data are~~

necessary to obtain estimates directly comparable to predictions from a certain peatland model (Yu et al., 2001; Teickner et al., 2024b). ~~Recently, we used~~. Moreover, initial leaching losses (losses of soluble compounds, which do not originate from microbial depolymerization, due to leaching during the first days to weeks of incubation) can bias decomposition rate estimates if they are not explicitly considered and can vary between species and experiments (Yu et al., 2001; Teickner et al., 2024b). Therefore, raw data (remaining masses) are necessary for any meaningful test of decomposition modules with litterbag data. The recently published Peatland Decomposition Database (Teickner and Knorr, 2024b) contains raw data from available *Sphagnum* litterbag data to estimate decomposition rates which can be directly compared to decomposition rates predicted by the HPM (Teickner et al., 2024b) experiments and therefore allows to estimate parameters with any mass loss-based decomposition model and therefore also allows to consider initial leaching losses.

Even though tests of only a part of a model are less uncertain than tests of whole models, there still is a risk that they are dominated by uncertainties. Remaining masses in litterbag experiments are often very variable, even under controlled environmental conditions (e.g. Bengtsson et al. (2018))(e.g., Bengtsson et al., 2018), and for many litterbag experiments, a range of decomposition rates may produce similar predictions for remaining masses (e.g., Yu et al., 2001), also if a litterbag decomposition model compatible with the HPM is used (Teickner et al., 2024b). Finally, also only five model parameters, as in the case of the HPM decomposition module, can make predictions uncertain. These uncertainties have to be taken into account to check whether litterbag data are compatible with the peatland model. A possible way to do this is to combine the HPM decomposition module, ~~the a~~ litterbag decomposition model ~~from our previous study~~ compatible with this module, and available litterbag experiments into one model and use Bayesian data analysis (Gelman et al., 2014) to estimate uncertainties of data and parameters.

If such a test suggests that decomposition rates predicted by the HPM decomposition module do not fit estimates from litterbag experiments, ~~or only if parameter estimates of the decomposition module differ from the parameter values originally suggested~~, even if main uncertainty sources are considered, ~~we have the test has~~ identified a discrepancy worth considering in more detail. We can then ~~identify how the estimated parameter values differ from the standard values and~~ analyze whether previous sensitivity analyses of the HPM suggest that these discrepancies may have larger effects on the predicted C accumulation, ~~and if this is the case, the discrepancies are worth testing in future litterbag experiments~~.

Our aim is to test the HPM ~~decomposition~~ decomposition module against decomposition rates estimated from available *Sphagnum* litterbag experiments. Specifically, we want to:

1. Test whether the HPM decomposition module can predict litterbag decomposition rates for different *Sphagnum* species along the gradient from oxic to anoxic conditions.
2. ~~Test whether HPM parameters estimated~~ Estimate HPM decomposition module parameters from litterbag data ~~are compatible with the values originally proposed in the HPM and compare them to the originally suggested values~~ (standard parameter values) (Frolking et al., 2010) that are often used when applying the HPM (Tab. 1).

~~We test the following hypotheses:-~~

125 3. ~~The HPM can successfully predict decomposition rates estimated~~ If some of the parameter values differ, identify the possible causes why parameter estimates from litterbag data under oxic and anoxic conditions differ to provide guidance for future litterbag experiments.

4. ~~Analyze whether estimated differences in~~ HPM parameter values ( $k_{i,0}$ ,  $W_{opt}$ ,  $e_1$ ,  $f_{min}$ ,  $e_2$ ) estimated from litterbag experiments are compatible with the standard values could imply significant differences in decomposition rates and long-term peat accumulation.

130 To address these aims, we ~~developed a model that combines used~~ the HPM decomposition module and our previous *Sphagnum* litterbag decomposition model, which estimates to predict decomposition rates in available litterbag experiments ~~while considering~~ and compared these to decomposition rates estimated for the same litterbag experiments with a litterbag decomposition model that considers initial leaching losses (Teickner et al., 2024b) ~~. Estimated decomposition rates of this model can be directly compared to decomposition rates predicted by the HPM because the formula to compute remaining~~ masses from decomposition rates is the same (Fig. 1). These predictions require the peat degree of saturation, which we estimate with the modified Granberg model (Granberg et al., 1999; Kettridge and Baird, 2007) from water table depth data reported in these studies. Furthermore, some *Sphagnum* litterbag experiments do not report water table depths and therefore cannot be used to test the HPM, but they still provide information on initial leaching losses and decomposition rates and therefore help to constrain parameter estimates. We therefore include these data via Bayesian hierarchical modeling in the

140 litterbag decomposition model. In summary, our approach combines the HPM decomposition module, the modified Granberg model, and a *Sphagnum* litterbag decomposition model that allows to consider initial leaching losses and to pool information across litterbag experiments (Teickner et al., 2024b). While this approach has its limitations, it exploits available data as far as possible, while considering known confounders and propagating relevant uncertainties.

We only test the decomposition module of the HPM, but ~~our results are valuable also for the decomposition modules of many~~ other peatland models that parameterize their decomposition modules from litterbag experiments because they also require a correct representation of how decomposition rates are controlled by the water table level. Our test identified discrepancies between the HPM and litterbag data that could give are also parameterized based on litterbag experiments and our modeling approach is flexible enough to be combined with other decomposition modules. Therefore, our test could serve as a blueprint for similar tests of other peatland model decomposition modules. Similarly, the parameter discrepancies identified here suggest

150 future litterbag experiments that would provide novel insights into ~~processes controlling anaerobic decomposition rates in future litterbag experiments.~~ oxic and anoxic controls of *Sphagnum* decomposition rates and our study therefore suggests a strategy to improve decomposition modules in general.

**Table 1.** Standard values of parameters of the decomposition module in the Holocene Peatland Model (Frolking et al., 2010).

| HPM parameter                            | Standard value | Description                                                                                                                                                                                                                                                                                                                                                         |
|------------------------------------------|----------------|---------------------------------------------------------------------------------------------------------------------------------------------------------------------------------------------------------------------------------------------------------------------------------------------------------------------------------------------------------------------|
| $W_{opt}$ ( $L_{water} L_{pores}^{-1}$ ) | 0.450          | Optimum degree of saturation for aerobic decomposition.                                                                                                                                                                                                                                                                                                             |
| $c_1$ (-)                                | 2.310          | Curvature of the relation of the aerobic decomposition rate to the degree of saturation (larger values imply a steeper decrease of decomposition rates for degrees of saturation diverging from $W_{opt}$ ).                                                                                                                                                        |
| $f_{min}$ ( $yr^{-1}$ )                  | 0.001          | Minimum anaerobic decomposition rate.                                                                                                                                                                                                                                                                                                                               |
| $c_2$ (m)                                | 0.300          | Anoxia scale length. Represents limitation of anaerobic decomposition rates with increasing distance below the annual average water table depth due to end product accumulation and limitation of available electron acceptors. Larger values mean that anaerobic decomposition rates decrease less strongly with depth below the average annual water table level. |
| $k_{0,hollow}$ ( $yr^{-1}$ )             | 0.130          | Maximum possible decomposition rate for hollow <i>Sphagnum</i> species.                                                                                                                                                                                                                                                                                             |
| $k_{0,lawn}$ ( $yr^{-1}$ )               | 0.080          | Maximum possible decomposition rate for lawn <i>Sphagnum</i> species.                                                                                                                                                                                                                                                                                               |
| $k_{0,hummock}$ ( $yr^{-1}$ )            | 0.060          | Maximum possible decomposition rate for hummock <i>Sphagnum</i> species.                                                                                                                                                                                                                                                                                            |

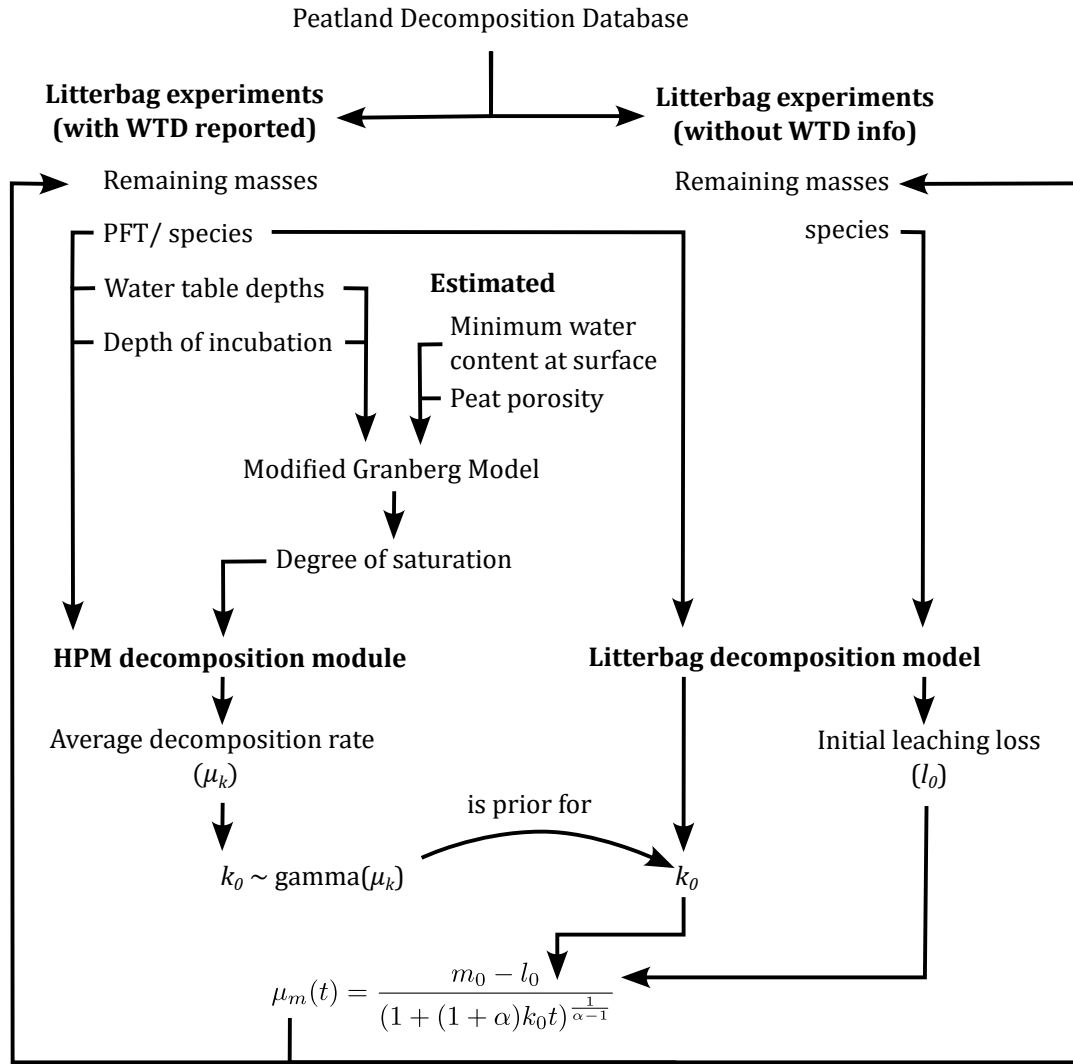

**Figure 1.** Conceptual representation of the modeling approach. Arrows represent flows of information. Litterbag data that have information on water table depths (WTD) and incubation depths are used to estimate average decomposition rates with the HPM decomposition module ( $\mu_k$ ). The HPM decomposition module needs plant functional type identity, peat degree of saturation, WTD, and incubation depth to predict decomposition rates. The modified Granberg model is used to estimate peat degree of saturation at incubation depths from WTD, minimum water content at the surface, and porosity, of which the latter two are estimated from the remaining masses. The litterbag decomposition model is used to estimate decomposition rates ( $k_0$ ) for all litterbag studies, including those that have information on WTD and those that have not. A gamma distribution with  $\mu_k$  as average is used as prior distribution for  $k_0$  for the litterbag experiments that have information on WTD (curved arrow). This helps to constrain initial leaching loss and decomposition rate estimates for studies that can be predicted with the HPM decomposition module. The Litterbag decomposition module also estimates initial leaching losses ( $l_0$ ) for all litterbag experiments. The equation at the bottom uses these to estimate remaining masses in the litterbag experiments. The litterbag decomposition model is described in more detail in section 2.2.1. See the text for further details.

## 2 Methods

### 2.1 *Sphagnum* litterbag data

155 To test the HPM [decomposition module](#) against litterbag data, we ~~use~~[used](#) the Peatland Decomposition Database (Teickner and Knorr, 2024b). In this study, we use data from Bartsch and Moore (1985), Vitt (1990), Johnson and Damman (1991), Szumigalski and Bayley (1996), Prevost et al. (1997), Scheffer et al. (2001), Thormann et al. (2001), Asada and Warner (2005), Trinder et al. (2008), Breeuwer et al. (2008), Straková et al. (2010), Hagemann and Moroni (2015), Golovatskaya and Nikonova (2017), and Mäkilä et al. (2018) to estimate ~~litterbag decomposition rates and predicted  $k_0$  were tested against  $k_0$  estimated~~  
160 ~~using the litterbag decomposition model. Data~~ from Johnson and Damman (1991), Szumigalski and Bayley (1996), Prevost et al. (1997), Straková et al. (2010), Golovatskaya and Nikonova (2017), and Mäkilä et al. (2018) ~~because only these studies reported water table depths required to make predictions reported WTD and therefore only these data were used to predict  $k_0$  also~~ with the HPM [decomposition module](#). Samples originally classified as *Sphagnum magellanicum* are here classified as *Sphagnum magellanicum aggr.* (Hassel et al., 2018).

### 165 2.2 Prediction of litterbag decomposition rates with the Holocene Peatland Model

To predict decomposition rates, the HPM decomposition module needs as inputs the litter type in terms of the HPM plant functional types ([PFT](#)), the fraction of mass already lost due to previous decomposition, the depth of the litter below the peat surface, the water table depth, and the peat degree of saturation (Frolking et al., 2010).

Predicting decomposition rates for the available litterbag data is not straightforward because the HPM [decomposition module](#)  
170 does not consider specific features of ~~litterbag experiments, because it available litterbag experiments. The HPM~~ does not specify how to assign species to plant functional types, ~~and because required variables such as the degree of saturation are not reported in the litterbag studies and therefore need~~. ~~Moreover, none of the available litterbag studies reported the degree of saturation which therefore needs~~ to be estimated. ~~In addition, we need to link decomposition rates estimated from litterbag data to the decomposition rates predicted by the HPM and this requires to link remaining masses in litterbag experiments to~~  
175 ~~decomposition rates.~~

[in order to make predictions with the HPM decomposition module.](#) The only variables that can be directly linked are the depth of the litter below the peat surface, [and](#) water table depths (both reported in litterbag experiments). All other variables ~~need~~[can be estimated from available litterbag experiments only with](#) additional assumptions that ~~we describe~~[are described](#) in the following subsections.

180 ~~In a previous study, we estimated  $k_0$~~ [In the following subsection, we give a more detailed description of our modeling approach, in particular of the model used to estimate decomposition rates from litterbag data, of the HPM decomposition module and how it predicts decomposition rates, and how we link the decomposition rates estimated from litterbag data to those predicted by the HPM decomposition module. The remaining subsections discuss how we derived or estimated PFT, WTD, and degree of saturation for the litterbag data](#) ~~using the decomposition equation of the HPM and additional steps to~~  
185 [make the litterbag data compatible with the HPM decomposition module.](#)



**Table 2.** Overview on litterbag experiments included for each *Sphagnum* taxon in this study. “HPM microhabitat” is the HPM microhabitat assigned to each taxon. Taxa without value are not considered in Johnson et al. (2015) (see section 2.2.2). “Number of experiments” is the number of litterbag experiments available from the Peatland Decomposition Database (these are either individual replicates or average values of replicates, depending on what data were reported in the studies). “Number of experiments with WTD data” is the number of litterbag experiments that also report water table depths and for which we therefore could make predictions with the HPM decomposition module. “Depth range” are the maximum and minimum depth below the peat surface at which litterbags were placed [cm]. Missing values mean that no study reported depths.

| Taxon                                       | HPM microhabitat | Number of studies | Number of experiments | Number of experiments with WTD data | Depth range |
|---------------------------------------------|------------------|-------------------|-----------------------|-------------------------------------|-------------|
| <i>Sphagnum</i> spec.                       |                  | 2                 | 16                    | 10                                  | 10, 30      |
| <i>S. angustifolium</i>                     | Hummock          | 4                 | 14                    | 8                                   | 1, 30       |
| <i>S. auriculatum</i>                       |                  | 1                 | 3                     | 0                                   | 0, 6        |
| <i>S. balticum</i>                          | Lawn             | 3                 | 12                    | 3                                   | 1, 30       |
| <i>S. cuspidatum</i>                        | Hollow           | 1                 | 5                     | 5                                   | 10, 50      |
| <i>S. fallax</i>                            | Lawn             | 1                 | 4                     | 1                                   | 1, 1        |
| <i>S. fuscum</i>                            | Hummock          | 9                 | 32                    | 13                                  | 1, 50       |
| <i>S. lindbergii</i>                        | Lawn             | 1                 | 2                     | 0                                   |             |
| <i>S. magellanicum</i> aggr.                | Hummock          | 3                 | 7                     | 5                                   | 1, 50       |
| <i>S. majus</i>                             | Hollow           | 1                 | 2                     | 2                                   | 10, 30      |
| <i>S. papillosum</i>                        | Lawn             | 2                 | 6                     | 1                                   | 0, 1        |
| <i>S. rubellum</i>                          | Hummock          | 1                 | 2                     | 2                                   | 10, 30      |
| <i>S. russowii</i>                          | Hummock          | 1                 | 3                     | 2                                   | 1, 1        |
| <i>S. russowii</i> and <i>capillifolium</i> |                  | 1                 | 18                    | 0                                   | 5, 5        |
| <i>S. squarrosum</i>                        | Lawn             | 1                 | 2                     | 0                                   | 0, 0        |
| <i>S. teres</i>                             | Lawn             | 1                 | 1                     | 1                                   | 2, 2        |

### 2.2.1 Remaining masses and decomposition rates

To estimate decomposition rates for available *Sphagnum* litterbag experiments we use the equation from the HPM that computes remaining masses from decomposition rates and decomposition time (Frolking et al., 2001, 2010), with three modifications. The original equation (equation (7) in Frolking et al. (2010)) and in addition considering initial leaching losses to avoid bias of  $k_0$  estimates (Teiekner et al., 2024b)4) in Frolking et al. (2001)) is:

$$m(t) = \frac{m_0}{(1 + (1 + \alpha)k_0t)^{\frac{1}{\alpha-1}}}, \tag{1}$$

Where  $m(t)$  is the remaining mass fraction of initial mass remaining at time  $t$ ,  $m_0$  is the mass fraction of initial mass remaining at time  $t = 0$  (the initial mass),  $k_0$  is the decomposition rate, and  $\alpha$  is a parameter that describes how decomposition slows down as mass is lost, where the HPM assumes  $\alpha = 2$  for simplicity (Frolking et al., 2001, 2010).

195 The modified version we use here is:

$$\mu_m(t) = \begin{cases} m_0 & \text{if } t = 0 \\ \frac{m_0 - l_0}{(1 + (\alpha - 1)k_0 t)^{\frac{1}{\alpha - 1}}} & \text{if } t > 0 \end{cases}, \quad (2)$$

where  $l_0$  is the ~~initial mass loss due to leaching~~ fraction of mass lost due to initial leaching. The HPM decomposition process does not assume that there are initial leaching losses, but these are commonly observed in litterbag experiments and bias decomposition rate estimates when they are ignored (Yu et al., 2001; Teickner et al., 2024b); therefore, the modification is necessary to allow a sensible test of the HPM decomposition module with litterbag data.

200 The second modification is that we do not assume  $\alpha = 2$ , but consider it as unknown parameter that is estimated from litterbag data. Since  $\alpha = 2$  was chosen for simplicity and attempts to reliably estimate  $\alpha$  have failed (e.g., Clymo et al., 1998; Frohling et al., 2001; T...), we estimate  $\alpha$  mainly to consider the possible error introduced by this parameter.

205 The third modification is that we change  $m(t)$  to  $\mu_m(t)$  because we assume that equation (2) describes only the average fraction of the initial mass remaining. For each retrieved litterbag, we assume that the remaining mass can be described with a beta distribution with precision parameter  $\phi_m$ :

$$m(t) \sim \text{beta}(\mu_m(t)\phi_m, (1 - \mu_m(t))\phi_m), \quad (3)$$

Values for  $k_0$  are estimated from remaining masses reported in available litterbag experiments conditional on equation (2) and a hierarchical prior structure (Teickner et al., 2024b):

$$210 \quad k_0 = \exp(\beta_{k,1} + \beta_{k,2,\text{species}} + \beta_{k,3,\text{species} \times \text{study}} + \beta_{k,4,\text{sample}}), \quad (4)$$

where  $\beta_{k,1}$  is the estimated decomposition rate across all litterbag experiments,  $\beta_{k,2,\text{species}}$  describes the difference of the average decomposition rate for the *Sphagnum* species,  $\beta_{k,3,\text{species} \times \text{study}}$  for the study (nested within species), and  $\beta_{k,4,\text{sample}}$  for the sample (litterbag experiment). All these parameters have normal distributions as priors. Hierarchical models of the same structure are used to estimate  $l_0$  and ~~respiration of soluble compounds,  $k_0$  is the decomposition rate of litter with no~~  
215 ~~prior decomposition,  $\alpha$  controls how the decomposition rate decreases as the fraction of remaining mass decreases and from~~ equation (2) and to estimate  $\phi_m$  from equation (3).

220 These decomposition rates estimated from litterbag experiments are constrained by decomposition rates the HPM decomposition module (Frohling et al., 2010) predicts for the same litterbag experiments. The HPM decomposition module describes how decomposition rates depend on the *Sphagnum* PFT, the degree of saturation and the depth of a litter sample below the water table. Similar to the remaining mass, we here assume that the HPM decomposition module predicts an average decomposition rate,  $\mu_k$ , instead of the decomposition rate of individual samples:

$$\mu_k = \begin{cases} k_{0,i} f_1(W) & \text{if } \hat{z} \leq 0 \\ k_{0,i} f_2(\hat{z}) & \text{if } \hat{z} > 0 \end{cases} \quad (5)$$

where  $k_{0,i}$  is the PFT-specific maximum possible decomposition rate (Tab. 1),  $W$  is the degree of saturation ( $L_{\text{water}} L_{\text{sample}}^{-1}$ ),  $\hat{z}$  the depth of the sample below the average annual water table ( $\hat{z} = z - z_{\text{wt}}$ , where  $z_{\text{wt}}$  and  $z$  are the depth of the water table and litterbag below the peat surface), and  $f_1$  and  $f_2$  are modifiers due to  $W$  (under oxic conditions) and  $\hat{z}$  (under anoxic conditions), respectively. These modifiers are described in equations (8) and (9) in Frohking et al. (2010):

$$f_1(W) = 1 - c_1(W - W_{\text{opt}})^2 \quad (6)$$

$$f_2(\hat{z}) = f_{\text{min}} + (f_1(1) - f_{\text{min}}) \exp\left(\frac{-\hat{z}}{c_2}\right), \quad (7)$$

where all not yet mentioned parameters are defined in Tab. 1.

In our model,  $k_0$  estimated from the litterbag data for each litterbag experiment with reported WTD (sample) (equation (2)) is assumed to describe how decomposition rates decrease with decreasing litter quality over time (Frohking et al., 2001) follow a gamma distribution with shape parameter  $\alpha_{\mu_k}$  (estimated) and average  $\mu_k$  (predicted for each sample with equation (5)):

$$k_0 \sim \text{gamma}\left(\alpha_{\mu_k}, \frac{\alpha_{\mu_k}}{\mu_k}\right), \quad (8)$$

Thus, the decomposition rate predicted by the HPM decomposition module (equation (8)) is a prior for  $k_0$  as estimated from the litterbag decomposition model (equation (4)). This forms the link between the litterbag decomposition model and the HPM decomposition module (Fig. 1) and also allows us to estimate parameters of the HPM decomposition module from the litterbag data. The advantage of this modeling approach is that we can consider litterbag experiments without water table depth to estimate  $l_0$  and  $k_0$  for individual *Sphagnum* species, which is additional information to constrain estimates of the HPM decomposition module parameters. Moreover, combining the litterbag decomposition model and the HPM decomposition module into one Bayesian model does not only estimate HPM decomposition module parameters from the litterbag data, but it also adjusts the decomposition rates estimated from litterbag data to the HPM decomposition module because the HPM decomposition module serves as prior in the combined model which therefore estimates what parameter values are compatible with the data and the combined model. This is exactly what we want because there is uncertainty both in the remaining masses reported in litterbag experiments and in HPM decomposition module parameters. If HPM decomposition module parameter estimates from the combined model are different from the standard values used in the original model (Tab. 1), even if we consider these uncertainties and use the HPM decomposition module as prior for the litterbag data, this is a discrepancy worth testing in future experiments.

### 2.2.2 Assignment of *Sphagnum* species to plant functional types

The HPM defines maximum possible decomposition rates ( $k_{i,0}k_{0,i}$ ) for three *Sphagnum* PFT (hollow, lawn, and hummock species), but not how to assign species to them. We assigned individual *Sphagnum* species to the three PFT by comparing their niche ~~water-table-depths-WTD~~ with the optimal ~~water-table-depth-WTD~~ for net primary production defined in the HPM. Specifically, we defined fixed average annual ~~water-table-depth-WTD~~ intervals for the PFT: hollow (<5 cm), lawn ( $\geq 5$  cm and < 15 cm), hummock ( $\geq 15$  cm) based on the HPM (Frolking et al., 2010). Then, we used niche ~~water-table-depths-WTD~~ and standard deviations from Johnson et al. (2015) to assign *Sphagnum* species to these three microhabitats. Using only average values and the microhabitat ~~water-table-depth-WTD~~ thresholds resulted in unintuitive assignments, such as assigning *S. fallax* to hummocks. To avoid such obvious misclassifications, we defined rules to assign species to HPM microhabitats based on the probability a species would occur in the three niche ~~water-table-depth-WTD~~ intervals. To compute the probabilities, we assumed a normal distribution (Johnson et al., 2015):

1. Species with a probability of occurrence  $\geq 15\%$  in the intervals of all three PFT were classified as lawn species.
2. In all other cases, species were assigned to the PFT for which their probability of occurrence was largest.

Litterbag data from Prevost et al. (1997) are incubations of peat samples where the species is unknown. Based on descriptions in ~~the paper~~this study, it is likely that the peat was formed by hummock species. ~~In addition, Hummock species are assumed to have the smallest decomposition rate among the three *Sphagnum* PFT in the HPM (Frolking et al., 2010) and this is in line with small~~ decomposition rate estimates for these samples ~~are small~~(Teickner et al., 2024b). For these reasons, we assigned these samples to the hummock PFT of the HPM.

When estimating parameters of the HPM decomposition module from the litterbag data (see section 2.3.1), we also estimated the maximum possible decomposition rate ( $k_{i,0}k_{0,i}$ ). *Sphagnum* species differ in their decomposition rate and the PFT of the HPM are a simplification ~~which that~~ may cause misfits of the HPM decomposition module to litterbag data. We therefore estimated  $k_{i,0}k_{0,i}$  for individual *Sphagnum* species in models ~~HPMe-LE-peat and HPMe-LE-peat-10~~HPM-all, HPM-leaching, and HPM-outlier (see section 2.3.1) and evaluated the variability of these species-specific estimates compared to the standard  $k_{0,i}$  values of the HPM *Sphagnum* PFT.

### 2.2.3 Degree of saturation

We estimated the degree of saturation with the modified Granberg model (ModGberg model) (Granberg et al., 1999; Kettridge and Baird, 2007) from ~~total porosity~~minimum water content at the surface ( $\theta_{0,min}$ ), total porosity ( $P$ ), the water table depth below the peat surface ( $z_{wt}$ ), and the ~~positions~~depth of the litterbags below the peat surface during the incubation ( $z$ ):

$$\theta(z) = \min \left( P, \theta_0 + (P - \theta_0) \left( \frac{z}{z_{wt}} \right)^2 \right)$$

$$\theta_0 = \max \left( \theta_{0,min}, 0.15z_{wt}^{-0.28} \right),$$
(9)

where  $\theta_0$  is the water content at the surface and  $0.15z_{wt}^{-0.28}$  is an empirical relation of  $\theta_0$  with the WTD (Kettridge and Baird, 2007)

The minimum water content at the surface was not reported in any study and we therefore assumed a minimum water content at the surface of  $0.05 \text{ L}_{\text{water}} \text{ L}_{\text{sample}}^{-1}$  with a standard deviation of  $0.05 \text{ L}_{\text{water}} \text{ L}_{\text{sample}}^{-1}$ , based on measurements from Hayward and Clymo (1982). The total porosity was not reported in any study and therefore we assumed an average value of 80% with a standard deviation of 10%, roughly based on values reported for low-density *Sphagnum* peat (Liu and Lennartz, 2019). An improved test of the HPM decomposition module would require litterbag experiments with direct measurements of the degree of saturation at sufficient temporal resolution.

#### 2.2.4 Fraction of mass lost during previous decomposition

The HPM decomposition module assumes that decomposition rates decrease the more of the initial mass has already been decomposed (Frolking et al., 2001, 2010). All litterbag data we use here, except samples from Prevost et al. (1997), are from *Sphagnum* samples collected from the surface of peatlands and therefore can be expected to have not experienced mass loss due to decomposition at the start of the experiments ( $m(t=0) = 1$  in equation (2)). Prevost et al. (1997) incubated *Sphagnum* peat collected from different depths below the surface two different depth levels from the same location and these samples probably have had already experienced some decomposition, however it is difficult to estimate how much. To avoid this problem, we estimated  $k_{i,0}$  and  $k_{0,i}$  separately for samples from different depths in Prevost et al. (1997), implicitly assuming that these are two different PFT with different maximum possible decomposition rate.

### 2.3 Testing the HPM decomposition module against litterbag data

#### 2.3.1 Model versions

To test different aspects of the HPM decomposition module and the additional assumptions we introduce, we computed several models which differ in whether HPM decomposition module parameters were fixed to their standard values or estimated from data, whether peat properties (porosity, water table depth, water content, minimum water content at the surface) are estimated from data or not, whether the litterbag decomposition model and the HPM decomposition module were estimated in two separate Bayesian models or one combined model, and whether the HPM decomposition module was extended to also predict  $l_0$  or not (Tab. 3).

The first model (HPM-HPM-standard) does not estimate any parameters of the HPM (except for  $\alpha$  decomposition module (equations (5) to (7))) and does not estimate peat properties from the litterbag data and therefore corresponds to the HPM decomposition module with standard parameter values. Values, while propagating prior uncertainties for peat properties. For this model, predictions of  $k_0$  are predicted independently equal  $\mu_k$  (equation (5)). This version of the HPM decomposition module is completely independent of the litterbag decomposition model, meaning that the HPM decomposition module is not used as prior for the litterbag decomposition model (Fig. 1). This also means that to compare  $k_0$  predicted by HPM-standard to  $k_0$  estimated from the litterbag decomposition model, we need to estimate the litterbag decomposition model independently, without

using the HPM decomposition module as prior. This independent litterbag decomposition model is called LDM-standard (Tab. 3). We use LDM-standard not only to compare  $k_0$  estimates to  $k_0$  predictions of HPM-standard, but also to analyze how  $k_0$  estimates of the litterbag decomposition model changes when we use different versions of the HPM decomposition module as prior in the subsequent models.

Each subsequent model combines the HPM decomposition module and the litterbag decomposition model into one Bayesian model via equation (8). Each of these models estimates an additional set of parameters from the litterbag data relative to the previous model (Tab. 3). First, only the peat properties (HPMf-LE-peatHPM-peat) are estimated, and second all HPM parameters ( $k_{i,0}$ ,  $k_{0,i}$ ,  $c_1$ ,  $W_{opt}$ ,  $f_{min}$ ,  $c_2$ ) (HPMe-LE-peatHPM-all). Finally, HPM-LE-peat-l0 extends HPM-LE-peatHPM-leaching extends HPM-all by adding formulas to model how  $l_0$  depends on the degree of saturation, similar to how the HPM decomposition module predicts  $k_0$ .

It is important to note that combining the litterbag decomposition model and the HPM decomposition module into one Bayesian model does not only estimate HPM parameters from the litterbag data, but it also adjusts the decomposition rates estimated from litterbag data to the HPM. The HPM serves as prior in the combined model and Bayesian probability theory estimates what parameter values are compatible with the data and the combined model. This is exactly what we want because there is uncertainty both in the remaining masses reported in litterbag experiments and in HPM parameters. If HPM parameter estimates from the combined model are not compatible with standard values used in the original model (Tab. 1) even if we adjust them to the HPM within the range allowed by the uncertainties, this is a discrepancy worth testing in future experiments  $k_0$  with equation (6).

HPMf-LE-peatHPM-peat tested whether the HPM can be made compatible with decomposition module can fit available litterbag data when the HPM decomposition module and the decomposition model for litterbag data litterbag decomposition model are combined and when uncertain-peat properties are estimated from data.

HPMe-LE-peatHPM-all estimates what HPM decomposition module parameter values are compatible with available litterbag data and therefore allows to test whether the standard parameter values are extreme relative to these estimates. Values of  $k_{i,0}$ ,  $k_{0,i}$  were estimated for each species separately, as described in section 2.2.2.

HPMe-LE-peat-l0HPM-leaching was computed because decomposition rates estimated from available litterbag experiments are sensitive to initial leaching losses (Yu et al., 2001; Lind et al., 2022; Teickner et al., 2024b). It is therefore interesting to see whether litterbag decomposition rates are adjusted differently in HPM-LE-peat-l0 estimated differently in HPM-leaching — when initial leaching losses are constrained by adding formulas to model how  $l_0$  depends on the degree of saturation — compared to HPM-LE-peatHPM-all — when initial leaching losses can be estimated more independently for each replicate loss estimates are constrained only by the litterbag decomposition model. Based on previous experiments with tea bags it is reasonable to assume that there is some relation between initial leaching losses and the degree of saturation (Lind et al., 2022). Specifically, we use the following logistic regression model to describe an average initial leaching loss per sample, in dependency of the degree of saturation:

$$\begin{aligned}\mu_l &= \text{logit}^{-1}(\beta_{l,1} + \beta_{l,2}W) \\ l_0 &\sim \text{beta}(\mu_l\phi_l, (1 - \mu_l)\phi_l),\end{aligned}\tag{10}$$

where  $\mu_l$  is the average initial leaching loss for a sample,  $\beta_{l,1}$  is the (hypothetical) average initial leaching loss at a degree of saturation 0 for each taxon,  $\beta_{l,2}$  is the coefficient that describes the relation to the degree of saturation ( $W$ ), and  $\phi_l$  transforms  $\mu_l$  and  $(1 - \mu_l)$  into the shape and rate parameters of a beta distribution. This beta distribution has the same function as the gamma distribution (equation (8)) for  $k_0$  (compare also with Fig. 1): it is a prior for  $l_0$  estimated with the litterbag decomposition model, where the average of this prior is  $\mu_l$ .

To check whether outliers in the litterbag data could influence our results, we computed one additional model, ~~HPMe-LE-peat-10-outlier~~H with the same structure as ~~HPMe-LE-peat-10~~HPM-leaching, but estimated without ~~littebag-litterbag~~ experiments identified as outliers. Litterbag experiments were defined as outliers if the reported average remaining mass of any litterbag (batch) during the experiment had a posterior probability  $> 99\%$  to be different from the remaining mass predicted by the litterbag decomposition model alone. This procedure identified experiments as outliers where remaining masses increased over time, where litterbags collected at intermediate time points had unexpectedly low remaining masses, or where initial leaching losses were retarded to later time points, presumably because of freezing after the start of the experiment (Teickner et al., 2024b). In total, 5 litterbag experiments were identified as outliers. Results for ~~HPMe-LE-peat-10-outlier~~HPM-outlier are shown in supporting information S8 and HPM ~~decomposition module~~ parameter estimates agree with ~~the other models where HPM parameters were estimated~~estimates of HPM-leaching and HPM-all.

Strictly, we do not test the decomposition module in the HPM, but the combination of the ~~decomposition model in the HPM~~HPM decomposition module and the modified Granberg model, assuming that uncertainties in water table depths are negligible and that we accounted sufficiently for uncertainties in total porosity. This ambiguity has to be accepted when combining heterogeneous litterbag data where some variables have to be estimated. Litterbag experiments where ~~water table depths and the degree of saturation is measured would be~~are measured at sufficient temporal resolution are needed to avoid this ambiguity in future studies and to improve any test of the HPM decomposition module.

### 2.3.2 Bayesian data analysis

~~For each model~~All models listed in Tab. 3 were computed with Bayesian statistics to account for relevant uncertainty sources and include relevant prior knowledge (for example that *Sphagnum* decomposition rates are unlikely to be larger than  $0.5 \text{ yr}^{-1}$ ). Bayesian computations were performed using Markov Chain Monte Carlo (MCMC) sampling with Stan (2.32.2) (Stan Development Team, 2021a) in R (4.2.0) (R Core Team, 2022) via the rstan package (2.32.5) (Stan Development Team, 2021b) using the NUTS sampler (Hoffman and Gelman, 2014), with four chains, 4000 total iterations per chain, and 2000 warmup iterations per chain. None of the models had divergent transitions, the minimum bulk effective sample size was larger than 400, and the largest rank-normalized  $\hat{R}$  was 1.01, indicating that all chains converged (Vehtari et al., 2021). All models used

**Table 3.** Overview of HPM [decomposition module](#) modifications computed in this study. ~~Complete formulas for the models are shown in supporting information ??.~~

| Model        | Description                                                                                                                                                                                                                                                                                                                                                          |
|--------------|----------------------------------------------------------------------------------------------------------------------------------------------------------------------------------------------------------------------------------------------------------------------------------------------------------------------------------------------------------------------|
| LDM-standard | The litterbag decomposition model without the HPM decomposition module as prior. This is model 1-4 from Teickner et al. (2024b).                                                                                                                                                                                                                                     |
| HPM-standard | The Holocene Peatland Model decomposition module with standard parameter values (Frolking et al., 2010). The model is run with peat water contents estimated with the modified Granberg model, using water table depths and litterbag depths reported from the litterbag studies, and assuming a fixed peat porosity, and minimum peat water content at the surface. |
| HPM-peat     | The same as HPM-standard, but combined with LDM-standard into one Bayesian model, where the HPM decomposition module is a prior for the litterbag decomposition model (Fig. 1). Water table depths, peat porosity, and minimum peat water content at the surface are estimated from data.                                                                            |
| HPM-all      | The same as HPM-peat, but now also parameters from the HPM decomposition module ( $k_{0,i}$ , $W_{opt}$ , $f_{min}$ , $c_1$ , $c_2$ ) are estimated from the litterbag data.                                                                                                                                                                                         |
| HPM-leaching | The same as HPM-all, but now also an average initial leaching loss for each species and, across all species, a factor, by which this average leaching loss increases or decreases as the peat degree of saturation increases, are estimated (equation (10)).                                                                                                         |
| HPM-outlier  | The same as HPM-leaching, but computed without litterbag experiments that were identified as outliers (see the text for details).                                                                                                                                                                                                                                    |

[the same priors for the same parameters and prior choices are listed and justified in supporting Tab. S1. Results of prior and posterior predictive checks are shown in supporting section S3.](#)

375

[We used power-scaling of the prior and likelihood distributions as implemented in the priorsense package \(0.0.0.9000\) \(Kallioinen et al., 2024\) to analyze the relative sensitivity of the posterior distribution to small perturbations of the prior and likelihood in HPM-leaching for HPM decomposition module parameters and peat properties. This is a computationally nonexpensive way to check whether the data provide information about a parameter and where prior and data may provide conflicting information \(Kallioinen et al., 2024\). Results of this analysis and further information on the data analysis are shown in supporting information S2.](#)



### 380 2.3.3 Fit of model predictions to estimated decomposition rates and observed remaining masses

To analyze how well the models fit remaining masses observed in the litterbag experiments, we plotted reported remaining masses versus remaining masses estimated by the litterbag decomposition model in HPM-peat, ~~we computed the difference of the decomposition rate~~ HPM-all, and HPM-leaching. HPM-standard is not linked to the litterbag decomposition model and therefore does not predict remaining masses.

385 To analyze how well all HPM decomposition module versions fit  $k_0$  estimated by the respective litterag decomposition model, we created a similar plot for  $k_0$ . Here, we compared predictions of HPM-standard (equation (8)) against estimates of LDM-standard (equation (4)). We also computed the average difference of  $k_0$  predicted by the HPM decomposition module and estimated from the litterbag data ~~for each litterbag replicate and from this the average~~. We then computed the posterior probability that this average difference is different from zero. A ~~small~~-large probability indicates a misfit of the model to  
390 available litterbag data. We also tested the same difference for specific species because graphical checks indicated that the decomposition rate prediction skill of the HPM decomposition module depends on species.

~~For HPM-LE-peat and HPM-LE-peat-l0, we computed the posterior probability that that the HPM parameter values estimated from litterbag data ( $k_{i,0}$ ,  $e_1$ ,  $W_{opt}$ ,  $e_2$ ,  $f_{min}$ ) differ from the standard parameter values (Tab. 1).~~

To test whether ~~HPMe-LE-peat-l0~~ HPM-leaching has not only a better fit to available litterbag data, but also a better pre-  
395 dictive accuracy for novel data than the model with standard parameter values (~~HPM~~HPM-standard), we compared how well both can predict ~~the one-pool decomposition rates~~  $k_0$  from litterbag experiments.

~~HPM-parameters of HPM~~ HPM decomposition module parameters of HPM-standard are not estimated from data and therefore we could compute the root mean square error of prediction ( $RMSE_{test}$ ) directly with  $k_0$  predicted by ~~HPM~~HPM-standard and estimated with ~~the litterbag decomposition model. HPM-parameters of HPM-LE-peat-l0~~ LDM-standard. HPM decomposition  
400 module parameters of HPM-leaching are estimated from the litterbag data and we therefore used cross-validation (CV) to estimate  $RMSE_{test}$ .

Since decomposition rates ~~form from~~ the same species and study usually are not independent, we defined blocks which were used as CV-folds. Each fold ~~consists of~~ represents the data from one study, ~~except those values that were measured for but only if there were still data for the same~~ *Sphagnum* species ~~for which only this study had left in the remaining~~ data (we want  
405 to estimate the predictive accuracy not for new species). ~~Data for species~~ Species with data from one study only were always used for model training and not part of the testing folds. This procedure resulted in 5 folds. ~~HPM and HPM-LE-peat-l0~~ HPM-standard and HPM-leaching were tested against the same data.

In the text,  $RMSE_{train}$  is the RMSE computed with the data a model was estimated with (for ~~HPM~~HPM-standard, the data the litterbag decomposition model was estimated with), and  $RMSE_{test}$  is the RMSE computed with independent test data.

### 410 2.3.4 Changes in $k_0$ and $l_0$ estimates of the litterbag decomposition models compared to LDM-standard

~~All models listed in Tab. 3 were computed with Bayesian statistics to account for relevant uncertainty sources and include relevant prior knowledge (for example that *Sphagnum* decomposition rates are unlikely to be larger than  $0.5 \text{ yr}^{-1}$ ). Bayesian~~

computations were performed using Markov Chain Monte Carlo (MCMC) sampling with Stan (2.32.2) (Stan Development Team, 2021a) and rstan (2.32.5) (Stan Development Team, 2021b) using the NUTS sampler (Hoffman and Gelman, 2014), with four chains, 4000 total iterations per chain. To analyze how parameter values of the litterbag decomposition model change when it is combined with different versions of the HPM decomposition module as prior, we estimated the average difference of  $k_0$  and 2000 warmup iterations per chain. None of the models had divergent transitions, the minimum bulk effective sample size was larger than 400, and the largest improved  $\hat{R}$  was 1.01, indicating that all chains converged (Vehtari et al., 2021). All models used the same priors for the same parameters and prior choices are listed and justified in supporting Tab. S1.

We used power-scaling of the prior and likelihood distributions as implemented in the priorsense package (0.0.0.9000) (Kallioinen et al., 2024).  $l_0$  estimates of each model version to  $k_0$  and  $l_0$  estimates of LDM-standard. In particular, this allowed us to analyze whether there is any change in the relative magnitude of  $l_0$  and  $k_0$  because the litterbag decomposition module would adjust these parameter values to fit the respective HPM decomposition module prior and still fit the observed remaining masses.

### 2.3.5 Magnitudes of $k_0$ along the gradient from oxid to anoxic conditions

To analyze how  $k_0$  changes along the gradient from oxid to anoxic conditions, we plotted  $k_0$  estimated by LDM-standard versus the water table depth below the litterbags. To this plot, we added  $k_0$  predicted by HPM-standard. To analyze how the relation of  $k_0$  changes for the HPM decomposition module modifications compared to HPM-standard, we computed differences between  $k_0$  estimated by HPM-peat, HPM-all, and HPM-leaching, respectively, and HPM-standard, and plotted these differences versus the water table depth below the litterbags.

### 2.3.6 Difference between values of $k_{0,i}$ , $c_1$ , $W_{opt}$ , $c_2$ , $f_{min}$ estimated from litterbag data to the standard parameter values

For HPM-all and HPM-leaching, we computed the posterior probability that the HPM decomposition module parameter values estimated from litterbag data ( $k_{0,i}$ ,  $c_1$ ,  $W_{opt}$ ,  $c_2$ ,  $f_{min}$ ) differ from the standard parameter values (Tab. 1). This way, we could identify discrepancies between standard parameter values and parameter values estimated from available litterbag data.

For HPM-leaching, we conducted in addition a sensitivity analysis, where we simulated decomposition of *S. fuscum* incubated at different depths in a peatland with water table depth of 40 cm below the surface, a porosity of  $0.7 \text{ L}_{\text{pores}} \text{ L}_{\text{sample}}^{-1}$ , and a minimum water content at the surface of  $0.05 \text{ g}_{\text{water}} \text{ g}_{\text{sample}}^{-1}$ . With these settings, we predicted five sets of average  $k_0$ : (1) with HPM-leaching ( $k_{0,\text{modified}}(\text{HPM-leaching})$ ). The remaining four sets were also predicted with HPM-leaching, but each time setting one of the HPM decomposition module parameters to their standard value ( $k_{0,\text{standard}}(\text{HPM-leaching})$ ): (2)  $c_1$ , (3)  $W_{opt}$ , (4)  $f_{min}$ , (5)  $c_2$ . We then computed the difference of  $k_0$  from set (1) and (2) to analyze the relative sensitivity of the posterior distribution to small perturbations of the prior and likelihood in HPM-LE-peat-10 for HPM parameters and peat properties. This is a computationally nonexpensive way to check whether the data provide information about a parameter and where prior and data may provide conflicting information (Kallioinen et al., 2024). Results of this analysis and further information on the data analysis are shown in supporting information S2. effect of the new  $c_1$  estimate, from set (1) and (3) to analyze the effect of

the new  $W_{opt}$  estimate, and so on for sets (4) and (5). This gives the difference in decomposition rates of HPM-leaching if we would set individual HPM decomposition module parameters to their standard values. This way, we could analyze what HPM decomposition module parameters contribute to a change in  $k_0$  predictions along the gradient from oxic to anoxic conditions.

### 3 Results

#### 3.1 ~~Fit and predictive accuracy of the different versions of the Holocene Peatland Model to available litterbag data~~

#### 3.1 Fit and predictive accuracy of the different versions of the HPM decomposition module to available litterbag data

~~The~~ In each model, the litterbag decomposition model fitted the observed remaining masses similarly well (Fig. 2 (a) and supporting Fig. S2), no matter whether the HPM decomposition module was used as prior or not, and whether its parameters were estimated from data (HPM-all, HPM-leaching) or not (HPM-peat). Thus, remaining masses do not indicate large differences between the model versions.

For  $k_0$ , the picture is more nuanced: When the HPM decomposition module ~~with standard parameter values (HPMf) fitted decomposition rates estimated from litterbag data to variable degrees (is not used as prior (HPM-standard), it fitted  $k_0$  estimated by the litterbag decomposition model on average less well than when it was used as prior (all other model versions) (Fig. 2, Tab. 4). All other models had an improved overall fit (smaller~~ For example, HPM-standard had an average  $RMSE_{train}$  ~~) to the data (Tab. 4, Fig. 2). Despite better fitting the data, HPM-LE-peat-10 did not predict  $k_0$  better in of  $0.11 \text{ yr}^{-1}$ , whereas HPM-leaching had an average  $RMSE_{train}$  of  $0.02 \text{ yr}^{-1}$ . However, the cross-validation than HPMf, as indicated by a large indicates that when applied to novel samples, both HPM-standard and HPM-leaching would perform similarly well if one considers the large uncertainty of the  $RMSE_{test}$  estimates (Tab. 4).~~

Errors of HPMf differed between species (Fig. 4). They were particularly small for *S. fuscum* ( $RMSE_{train} = 0.02 \text{ yr}^{-1} \pm 0.004$ , data from 5 studies) as well as *Sphagnum* spec. samples from Prevost et al. (1997). Interestingly, all model versions where the HPM decomposition module was used as prior had comparable fits ( $RMSE_{train} = 0.02 \text{ yr}^{-1} \pm 0$ ). All rates were underestimated for *S. angustifolium* ( $RMSE_{train} = 0.23 \text{ yr}^{-1} \pm 0.09$ , data from 3 studies). (Tab. 4), even the version that still has standard parameter values for the HPM decomposition module (HPM-peat). This indicates that a change in HPM decomposition module standard parameter values is not required to make the HPM decomposition module fit  $k_0$  values estimated from available litterbag data via the litterbag decomposition model, under the assumptions we made. Instead, the results indicate that parameter values of the litterbag decomposition model can be adjusted to fit predictions of this HPM decomposition module prior.

**Table 4.** Training and testing RMSE for decomposition rates as predicted by different versions of the decomposition module of the Holocene Peatland Model (see Tab. 3 for a description of the models) and number of misfits.  $\text{RMSE}_{\text{train}}(k_0)$  is the root mean square error of model predictions for litterbag replicates used during model computation.  $\text{RMSE}_{\text{test}}(k_0)$  is the RMSE for litterbag replicates used in blocked cross-validation. Where no  $\text{RMSE}_{\text{test}}(k_0)$  is given, it was not computed for these models. Values are averages and lower and upper bounds of central 95% ~~uncertainty~~ posterior intervals ( $\text{yr}^{-1}$ ). Misfits counts the number of litterbag experiments for which  $k_0$  predicted by the HPM decomposition module modification differed from  $k_0$  as estimated from the litterbag decomposition model with a posterior probability of at least 99%. In total,  $k_0$  was predicted with the HPM decomposition module modifications for 53 litterbag experiments ( $\text{RMSE}_{\text{train}}(k_0)$ ) or 29 ( $\text{RMSE}_{\text{test}}(k_0)$ ).

| Model                                                 | $\text{RMSE}_{\text{train}}(k_0)$ | $\text{RMSE}_{\text{test}}(k_0)$ | Misfits |
|-------------------------------------------------------|-----------------------------------|----------------------------------|---------|
| <del>HPMf</del> <u>HPM-standard</u>                   | 0.105 (0.051, 0.191)              | 0.136 (0.06, 0.252)              | 13      |
| <del>HPMf-LE-peat</del> <u>HPM-peat</u>               | 0.02 (0.013, 0.029)               |                                  | 0       |
| <del>HPMe-LE-peat</del> <u>HPM-all</u>                | 0.014 (0.008, 0.021)              |                                  | 0       |
| <del>HPMe-LE-peat-l0</del> <u>HPM-leaching</u>        | 0.022 (0.012, 0.039)              | 0.088 (0.038, 0.179)             | 0       |
| <del>HPMe-LE-peat-l0-outlier</del> <u>HPM-outlier</u> | 0.021 (0.013, 0.032)              |                                  | 0       |

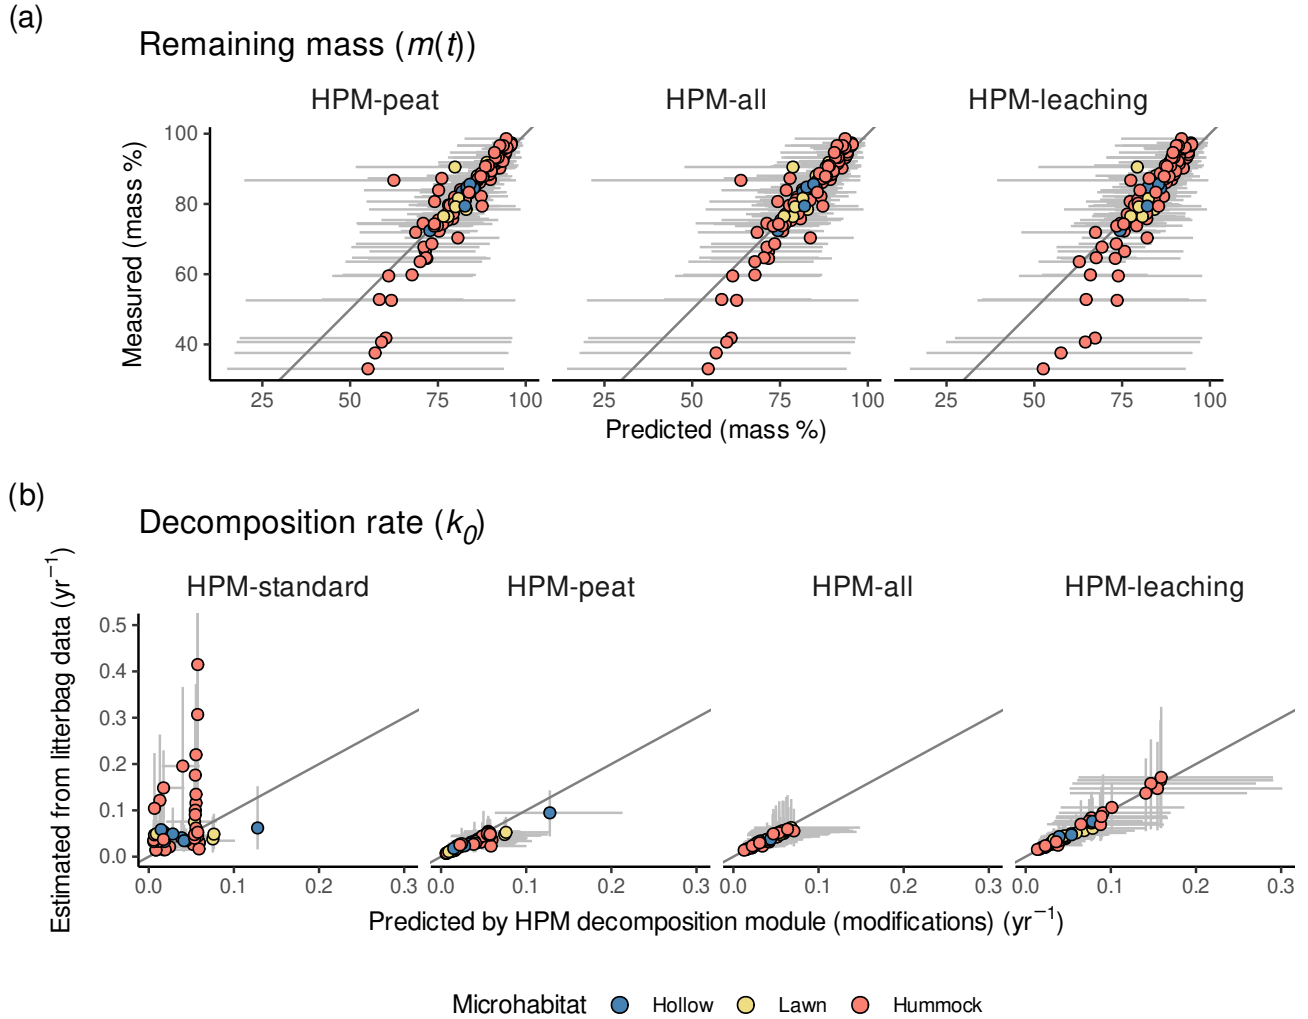

**Figure 2.** Comparison of (a) Measured remaining masses versus remaining masses predicted by the litterbag decomposition model combined with each HPM decomposition module version. Values are shown for litterbag experiments with reported water table data. For HPM-standard no values are shown because it was not combined with a litterbag decomposition model. (b)  $k_0$  estimated by the litterbag decomposition model versus  $k_0$  predicted by different modifications of the HPM decomposition module (Tab. 3). For HPM-standard, y-axis values are  $k_0$  estimates of LDM-standard. For all other model versions, y-axis values are  $k_0$  estimates of the litterbag decomposition module with the respective HPM decomposition module version as prior. Points represent average estimates and error bars 95% posterior intervals. Points are colored according to the microhabitat classification of *Sphagnum* species (see the Methods section for details). Error-In (b), error bars exceeding  $0.5 \text{ yr}^{-1}$  are clipped.

### 3.2 Differences in How are parameter values of the litterbag decomposition model behavior-adjusted when different versions of the Holocene Peatland Model and its modifications HPM decomposition module are used as prior?

475 ~~The HPM with standard parameter values can fit litterbag data due to large uncertainties in available litterbag data.~~

HPMf-LE-peat suggests that it is possible to fit remaining masses in litterbag experiments without changing the standard HPM parameter values, simply by adjusting  $k_0$  and  $l_0$  estimates from of the litterbag decomposition models such that they fit the HPM predictions. Fig. 2 shows that HPMf-LE-peat can reproduce these adjusted  $k_0$  estimates. Fig. 4 shows that this better fit is mainly achieved by adjusting  $l_0$  estimates from and  $l_0$  estimates of the litterbag decomposition model (mainly decreased) to the HPM and not because of differences in peat properties estimated from the litterbag data. In combination with the improved fit of HPMf-LE-peat, this indicates that uncertainties in the litterbag data are large enough to make the HPM compatible with the litterbag decomposition rates by varying the magnitude of decomposition rates and initial leaching losses, even though the standard HPM parameters are not necessarily (most) compatible with the data. This indicates that a better test of the HPM decomposition module requires more accurate estimates of initial leaching losses.

480

485

The two modifications of the HPM where HPM parameters were estimated from litterbag data (HPMe-LE-peat, HPMe-LE-peat-l0) also differed in the magnitude of of each model version with the  $k_0$  and  $l_0$  and estimates of LDM-standard. We computed the average difference of  $k_0$  estimates, as well as the maximum possible initial decomposition rate for each species ( $k_{0,i}$ ). However, they had very similar estimates for the other HPM parameters ( $c_1$  estimates by the litterbag decomposition model for all models compared to the  $k_0$  estimates of LDM-standard (using only litterbag experiments with reported WTD). Average differences compared to LDM-standard are in the order HPM-peat < HPM-all < HPM-leaching (average and 95% confidence interval: -0.04 (-0.06, -0.02) < -0.03 (-0.06,  $W_{opt}$ -0.01) < -0.01 (-0.04, 0.01)  $\text{yr}^{-1}$ ). The magnitude (mean absolute difference) of adjustments of  $k_0$  estimates is different for different species (species with at least 3 samples): The largest average absolute differences across all models were made for *S. angustifolium* (0.15 (0.06, 0.27)  $\text{yr}^{-1}$ ) and the smallest for *Sphagnum* spec. (0.01 (0.01,  $f_{min}$ ,  $c_2$ )).

490

495

HPMe-LE-peat estimated larger initial leaching losses and smaller decomposition rates than the litterbag decomposition model from Teiekner et al. (2024b) alone, similar to HPMf-LE-peat (Fig. ??0.02)  $\text{yr}^{-1}$ ). This is particularly the case for *S. angustifolium*, for which the separate indicates that for some species  $k_0$  estimates of the litterbag decomposition model estimated much larger average decomposition rates and smaller initial leaching losses than the litterbag decomposition model in HPMe-LE-peat (Fig. 4). In contrast to this, initial leaching losses and smaller decomposition rates estimated by HPMe-LE-peat-l0 were more similar to estimates of the separate litterbag decomposition model from Teiekner et al. (2024b) (Fig. ??). This indicates again that a better test of the HPM is are forced to smaller values for HPM-peat and HPM-all, whereas differences are smaller for HPM-leaching.

500

505 With these changes in  $k_0$  estimates, a similar fit to remaining masses as observed for all models (see the previous subsection) is only possible when  $l_0$  can be estimated more accurately.

In line with this, the maximum possible decomposition rates for the species differ between the HPM modifications. HPMe-LE-peat-10 estimates a larger average maximum possible decomposition rate, particularly for *S. angustifolium*, than the other models (Fig. 4 and supporting Fig. S9).

510

~~In contrast to estimates for  $k_0$ ,  $l_0$ , estimates are changed in the opposite direction. To check this, we computed the average difference of  $l_0$  estimates by the litterbag decomposition model for all model versions compared to the  $l_0$  estimates of LDM-standard. Differences compared to LDM-standard are in the order HPM-leaching < HPM-all < HPM-peat (average and 95% confidence interval: 0.1 (-1.9, 2.2) < 2.8 (0.7, 4.8) < 3.3 (1.6, 5) mass %). Again, the magnitude (mean absolute difference) of adjustments of  $l_0$  estimates is different for different species (species with at least 3 samples): The largest average absolute differences across all models were made for *S. angustifolium* (11.4 (7, 16.6) mass %) and the smallest for *Sphagnum* spec. (1.43 (0.86, 2.39) mass %). Thus, the smaller  $k_0$  estimates are indeed compensated by larger  $l_0$  estimates for HPM-peat and  $k_{t,0}$ , the other HPM parameters had similar estimates HPM-all, whereas the difference to LDM-standard is smaller for HPMe-LE-peat HPM-leaching.~~

520 Overall, this analysis indicates that errors in remaining masses observed in available litterbag experiments are large enough to support a range of  $k_0$  and HPMe-LE-peat-10 and as a consequence relative differences of decomposition rates along the water table depth gradient are very similar between all models (Fig. 4). Estimates for  $f_{min}$  did not differ much to the prior value and the power-scaling sensitivity analysis indicates a weak influence of the data (supporting information S2) and therefore that available litterbag data provide only little information about minimum decomposition rates under anoxic conditions.

525

~~HPMe-LE-peat-10 suggests that both positive and negative relations of  $l_0$  estimates. The equivalent fit of the different model versions is therefore caused by adjusting  $k_0$  to the HPM prior, and adjusting  $l_0$  are compatible with available litterbag data (95% confidence intervals for the slope (logit scale): (-0.28, 0.15), supporting Fig. ??). In contrast to HPMf-LE-peat and HPMe-LE-peat, it estimates on average smaller initial leaching losses, more similar to estimates of the litterbag decomposition model not combined with the HPM (Teickner et al., 2024b) (Fig. ??) as needed to fit observed masses.~~

530  $k_0$  estimated from the litterbag data (Predicted with HPM = No) and predicted by different versions of the HPM decomposition module (Predicted with HPM = Yes) (HPMf, HPMf-LE-peat, HPMe-LE-peat, or HPMe-LE-peat-10) versus reported (HPMf) or estimated (HPMf-LE-peat, HPMe-LE-peat, or HPMe-LE-peat-10) average water table depths below the litterbags. Points represent average estimates and error bars 95% posterior intervals. Lines are predictions of linear models fitted to the average estimates. *Sphagnum* spec. are samples that have been identified only to the genus level. Only data for species with at least three replicates are shown.

Plot of  $l_0$  (a) or  $k_0$  (b) as predicted by litterbag decomposition models combined with different modifications of the HPM (see Tab. 3) versus estimates of the litterbag decomposition model from Teickner et al. (2024b) for the same data. Litterbag experiments for which the HPM decomposition module could make predictions (water table depths reported in the studies) and to which the HPM parameters were fitted are shown as white points. Estimates for experiments from Hagemann and Moroni (2015) are not shown because these always had large estimates for  $k_0$ , were not directly tested against the HPM, and would make it difficult to represent the pattern for samples for which the HPM predicted  $k_0$ .

### 3.3 How do HPM decomposition module parameter estimates differ to the standard values?

Two model versions estimated HPM decomposition module parameters ( $c_1, W_{opt}, f_{min}, c_2, k_{0,i}$ ): HPM-all and HPM-leaching. These models indicate larger values for  $c_2$  and  $W_{opt}$  than the standard values. Figure 3 shows marginal posterior densities of the maximum possible decomposition rate for each species and the four other HPM parameters for HPM-LE-peat and HPM decomposition module parameters for HPM-all, with standard parameter values as defined in Frolking et al. (2010) indicated by vertical lines. For both HPM-LE-peat and HPM-LE-peat-10, the range of parameter estimates contains the standard values, but HPM-all and HPM-leaching, there are large posterior probabilities that  $c_2$  ( $P_{\text{HPM-LE-peat}}(c_2 > 0.3 \text{ m}) = 1$  and  $P_{\text{HPM-LE-peat-10}}(c_2 > 0.3 \text{ m}) = 1$ ,  $P_{\text{HPM-all}}(c_2 > 0.3 \text{ m}) = 1$  and  $P_{\text{HPM-leaching}}(c_2 > 0.3 \text{ m}) = 1$ ) and  $W_{opt}$  ( $P_{\text{HPM-LE-peat}}(W_{opt} > 0.45 L_{\text{water}}) = 1$  and  $P_{\text{HPM-LE-peat-10}}(W_{opt} > 0.45 L_{\text{water}} L_{\text{pores}}^{-1}) = 0.98$ ,  $P_{\text{HPM-all}}(W_{opt} > 0.45 L_{\text{water}} L_{\text{pores}}^{-1}) = 1$  and  $P_{\text{HPM-leaching}}(W_{opt} > 0.45 L_{\text{water}} L_{\text{pores}}^{-1}) = 1$ ) have larger values than the standard parameter values, indicating a discrepancy between the HPM decomposition module and available litterbag data (Fig. 3 and supporting Fig. S11).

Both models also In contrast, estimates for  $f_{min}$  do not differ much to the prior value and the power-scaling sensitivity analysis indicates a weak influence of the data (supporting information S2) and therefore that currently available litterbag data provide only little information about minimum decomposition rates under anoxic conditions. HPM-all and HPM-leaching suggest a large variability of  $k_{0,i}$  for individual species: Both models estimate a large posterior probability ( $> 95\%$ ) that *S. russowii* and *S. rubellum* have a larger, and that *S. cuspidatum* has a smaller maximum possible decomposition rate ( $k_{0,i}$ ) than the standard values for the respective PFT (Fig. 3 (b) and supporting Fig. S11). However, because of the larger variability of estimates for  $k_{0,i}$  were very variable for the same species when different subsets of the litterbag data were used to estimate the model in the cross-validation (compare with the previous subsection), this discrepancy is probably more uncertain when new data would become available. This indicates that samples of the same species from different studies have a large variability in  $k_{0,i}$  values. In summary, when HPM decomposition module parameters are estimated from available litterbag data, estimates for  $W_{opt}$  and  $c_2$  are larger than the standard values, differences to the  $c_1$  and  $f_{min}$  standard value cannot be detected, and estimates for  $k_{0,i}$  are variable and have large errors for different species.



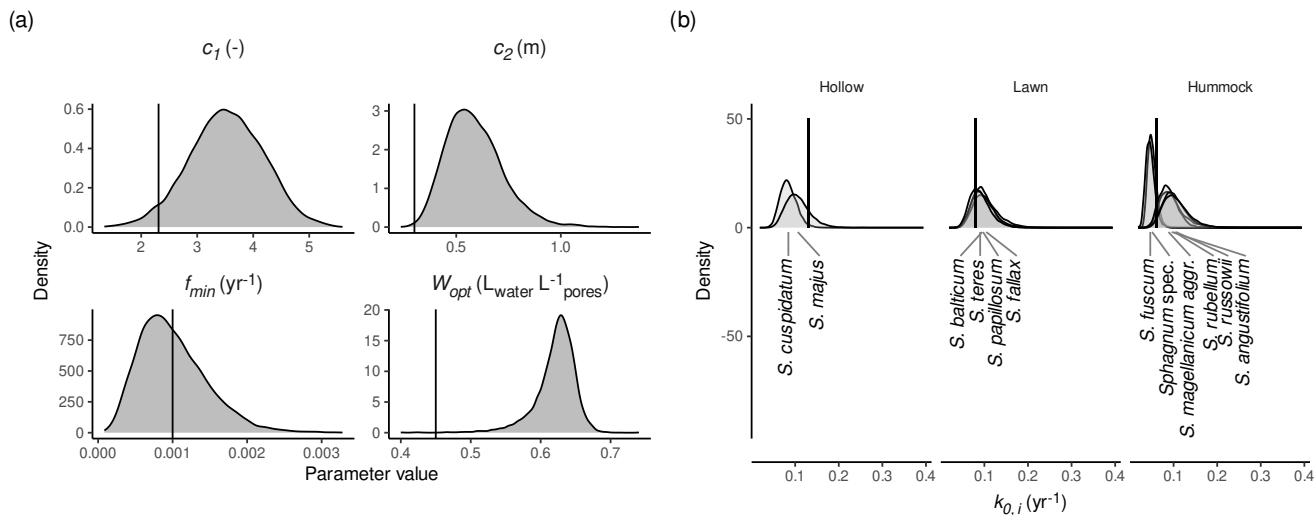

**Figure 3.** Marginal posterior distributions of HPM decomposition ~~model~~-module parameters (see Tab. 1) as estimated by HPMe-LE-peatHPM-all. (a) Marginal posterior distributions for  $c_1$ ,  $W_{opt}$ ,  $f_{min}$ , and  $c_2$ . (b) Marginal posterior distributions for  $k_{0,i}$  (maximum possible decomposition rate for species  $i$ ) estimated for each species. Species were assigned to HPM microhabitats as described in section 2.2.2. (b) other HPM parameters 2.2.2. Vertical black lines are the standard parameter values from Frolking et al. (2010). *Sphagnum* spec. are samples that have been identified only to the genus level.

## 4 Discussion

Our aims were to test whether the HPM can predict litterbag decomposition rates for different *Sphagnum* species along the gradient from oxic to anoxic conditions, and to test whether HPM parameters estimated from litterbag data are compatible with the HPM standard values.

### 3.1 Magnitude and change of decomposition rates along the gradient from oxic to anoxic conditions

Our analysis suggests a comparison of  $k_0$  estimates of LDM-standard and  $k_0$  estimates of HPM-standard shows that the HPM decomposition module with standard parameter values can fit available litterbag data, but only because the uncertainties in litterbag data are large enough to support a range of parameter values. The price to be paid for this is to assume larger initial leaching losses and smaller decomposition rates than estimated with the litterbag decomposition model alone (Teickner et al., 2024b) (Fig. ??). Comparable or better fits could be achieved by estimating HPM parameters from litterbag data (HPMe-LE-peat implies a steeper decrease of decomposition rates from oxic to anoxic conditions than LDM-standard and, for some species, smaller anaerobic decomposition rates. Figure 4 (a) shows  $k_0$  estimated by LDM-standard and HPMe-LE-peat-10) and similar decomposition rate and initial leaching losses as estimated from litterbag data alone were predicted by a model that assumes smaller initial leaching losses (HPMe-LE-peat-10). Decomposition rates can be estimated more accurately from litterbag

580 experiments when initial leaching losses are estimated more accurately (Teckner et al., 2024b). Therefore, an important result of our study is that stronger tests of the HPM decomposition module and other peatland models require litterbag experiments that allow to estimate initial leaching losses more accurately than is possible with available experiments  $k_0$  predicted by HPM-standard versus water table depths below the litterbags reported in the studies for species with at least three litterbag experiments. Regression lines were fitted to both sets of  $k_0$  values and they indicate an on average steeper slope for HPM-standard than for LDM-standard for many species (with large uncertainties). Moreover, under anoxic conditions (negative water table depth),  $k_0$  estimates by LDM-standard are larger on average for many of the litterbag experiments than what HPM-standard predicts (Fig. 4 (b)).

Despite these uncertainties, our analysis

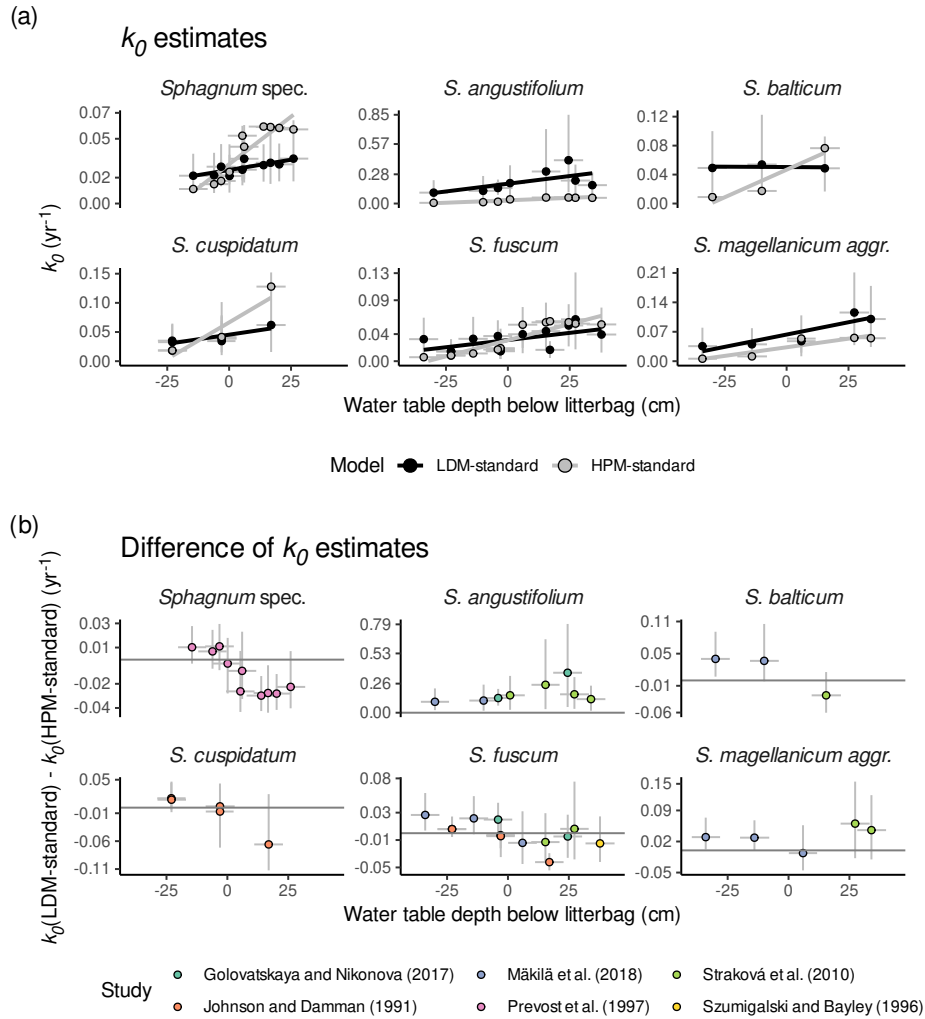

**Figure 4.** Comparison of  $k_0$  estimates of HPM-standard and LDM-standard (Tab. 3) for species with at least three litterbag experiments. (a)  $k_0$  estimates of HPM-standard (grey) and  $k_0$  estimates of LDM-standard (black) versus reported average water table depths below the litterbags (negative values represent litterbags placed below the water table, positive values represent litterbags placed above the water table in the unsaturated zone). (b)  $k_0$  estimates of LDM-standard minus  $k_0$  estimates of HPM-standard versus reported average water table depths below the litterbags (i.e., the difference of the values shown in (a)). Grey horizontal lines indicate a difference in  $k_0$  of  $0 \text{ yr}^{-1}$ . Points represent average estimates and error bars 95% posterior intervals. Lines are predictions of linear models fitted to the average estimates. *Sphagnum spec.* are samples that have been identified only to the genus level.

A comparison of  $k_0$  estimates of HPM-standard and the other modifications of the HPM suggests that better fits to available litterbag data are possible only if several HPM parameter values are adjusted, namely the maximum possible decomposition

rates for HPM PFT or *Sphagnum* species ( $k_{0,i}$ ), the optimum degree of saturation for decomposition ( $W_{opt}$ ), and the anoxia scale length ( $c_2$ ).

In the following sections, we discuss these discrepancies. In particular, we show that they imply a less steep gradient decomposition module suggests that when HPM decomposition module parameters are estimated, larger anaerobic decomposition rates and a less steep decrease of decomposition rates from oxic to anoxic conditions are predicted, similar to LDM-standard. We computed the difference of  $k_0$  predicted by HPM-standard and the other HPM decomposition module versions (Fig. 5). When the HPM decomposition module with standard parameter values is used as prior for the litterbag decomposition module (HPM-peat), it predicts  $k_0$  nearly identical to HPM-standard. In contrast, both model versions where HPM decomposition module parameters were estimated predict larger anaerobic decomposition rates and less of an increase under oxic conditions relative to anoxic conditions than HPM-standard. Thus, the HPM decomposition module with standard parameter values predicts a steeper decrease of decomposition rates from oxic to anoxic conditions than assumed by the standard HPM. We discuss how reliable this pattern is, considering that the data are from heterogeneous studies, what processes may and overall smaller anaerobic decomposition rates than LDM-standard and the models that estimate HPM decomposition module parameters from available litterbag data.

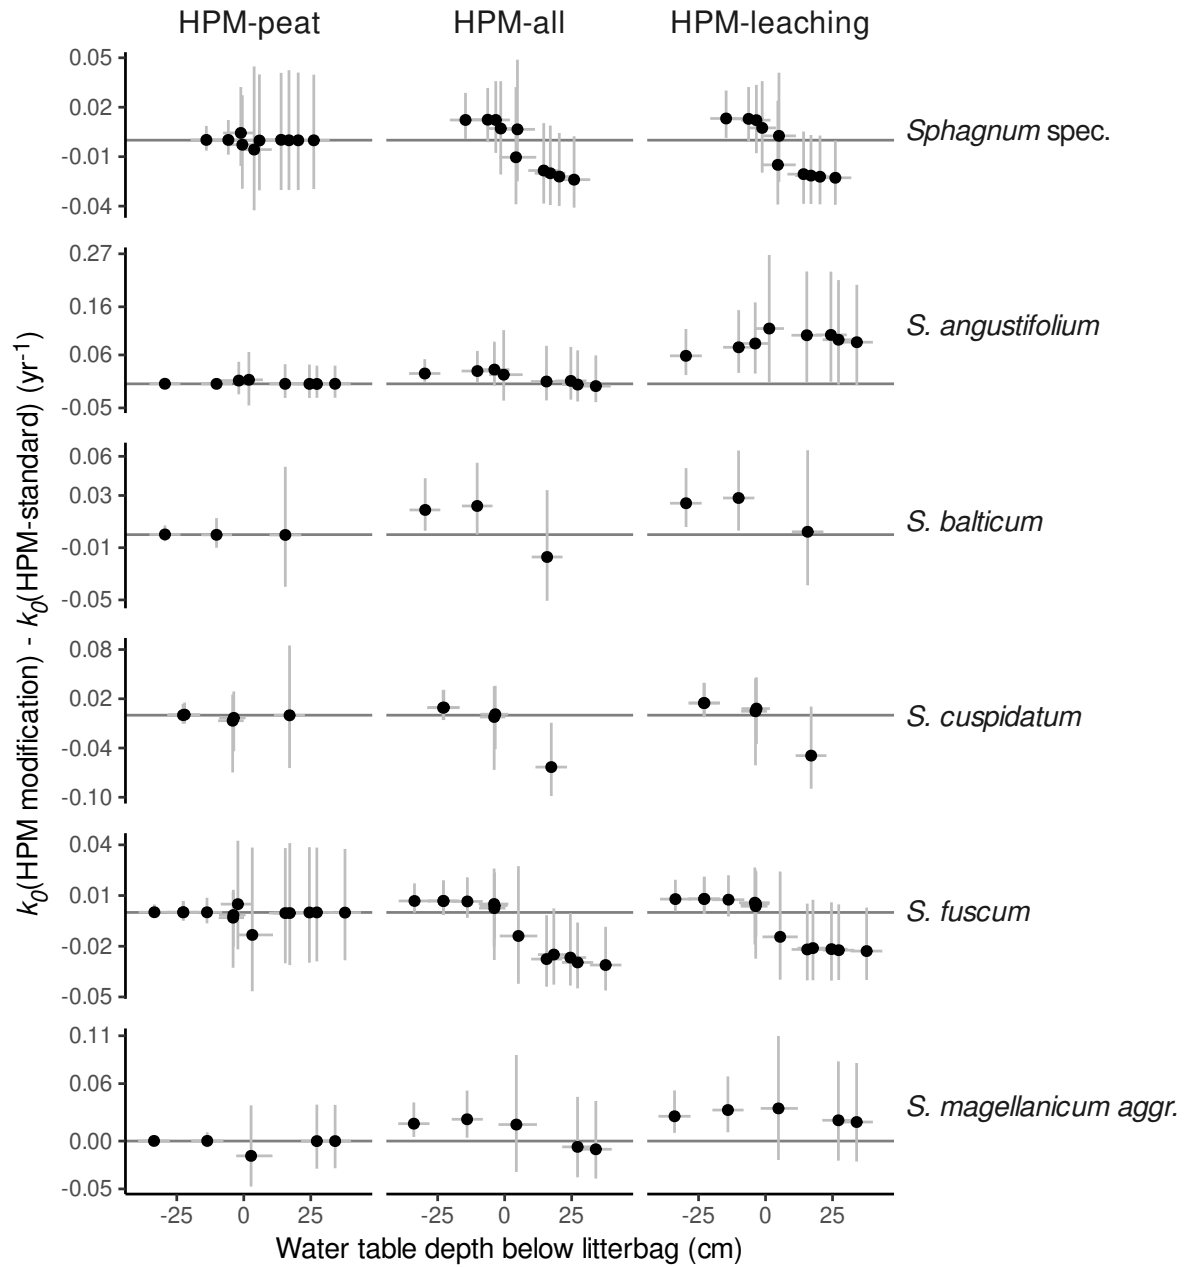

**Figure 5.**  $k_0$  predicted by HPM decomposition module modifications (either HPM-peat, HPM-all, or HPM-leaching) minus  $k_0$  predicted by the HPM decomposition module with standard parameter values (HPM-standard) versus estimated average water table depths below the litterbags (negative values represent litterbags placed below the water table, positive values represent litterbags placed above the water table in the unsaturated zone). Points represent average estimates and error bars 95% posterior intervals. *Sphagnum spec.* are samples which that been identified only to the genus level. Only data for species with at least three replicates are shown.

### 605 3.2 HPM decomposition module parameters that are responsible for the less steep gradient in decomposition rates from oxic to anoxic conditions

To analyze which of the HPM decomposition module parameters ( $c_1$ ,  $W_{opt}$ ,  $f_{min}$ ,  $c_2$ ) cause the less steep gradient ~~and how important the suggested differences in parameter values are for the predicted C accumulation.~~

610 ~~Three HPM parameters had estimates contrasting in decomposition rates from oxic to anoxic conditions, we conducted a sensitivity analysis, where we made predictions with HPM-leaching for the same species and the same gradient from oxic to anoxic conditions, each time setting one of the four parameters to their standard values ÷~~

615 ~~There is a large posterior probability that  $c_2$  is larger than the standard value of 0.3 m.  $c_2$  is the anoxia scale length of decomposition and is assumed to represent limitation of anaerobic decomposition below (four sets of predictions in total). We then computed the difference of the predicted  $k_0$  values to predictions of HPM-leaching (with no parameter value set to its standard value). This difference is plotted versus the depth of the water table depth as consequences of the accumulation of decomposition end-products and depletion of electron acceptors (Frolking et al., 2010). A larger value implies larger anaerobic decomposition rates at the same depth below the water table. There is a large posterior probability that  $W_{opt}$  is larger than the standard value of  $0.45 \cdot L_{water} \cdot L_{pores}^{-1}$  below the litter, as shown in Fig. 6. This analysis suggests that  $W_{opt}$  is and  $c_2$  cause the less steep gradient in decomposition rates from oxic to anoxic conditions, whereas the other two parameters have no qualitative influence.~~

620 influence.

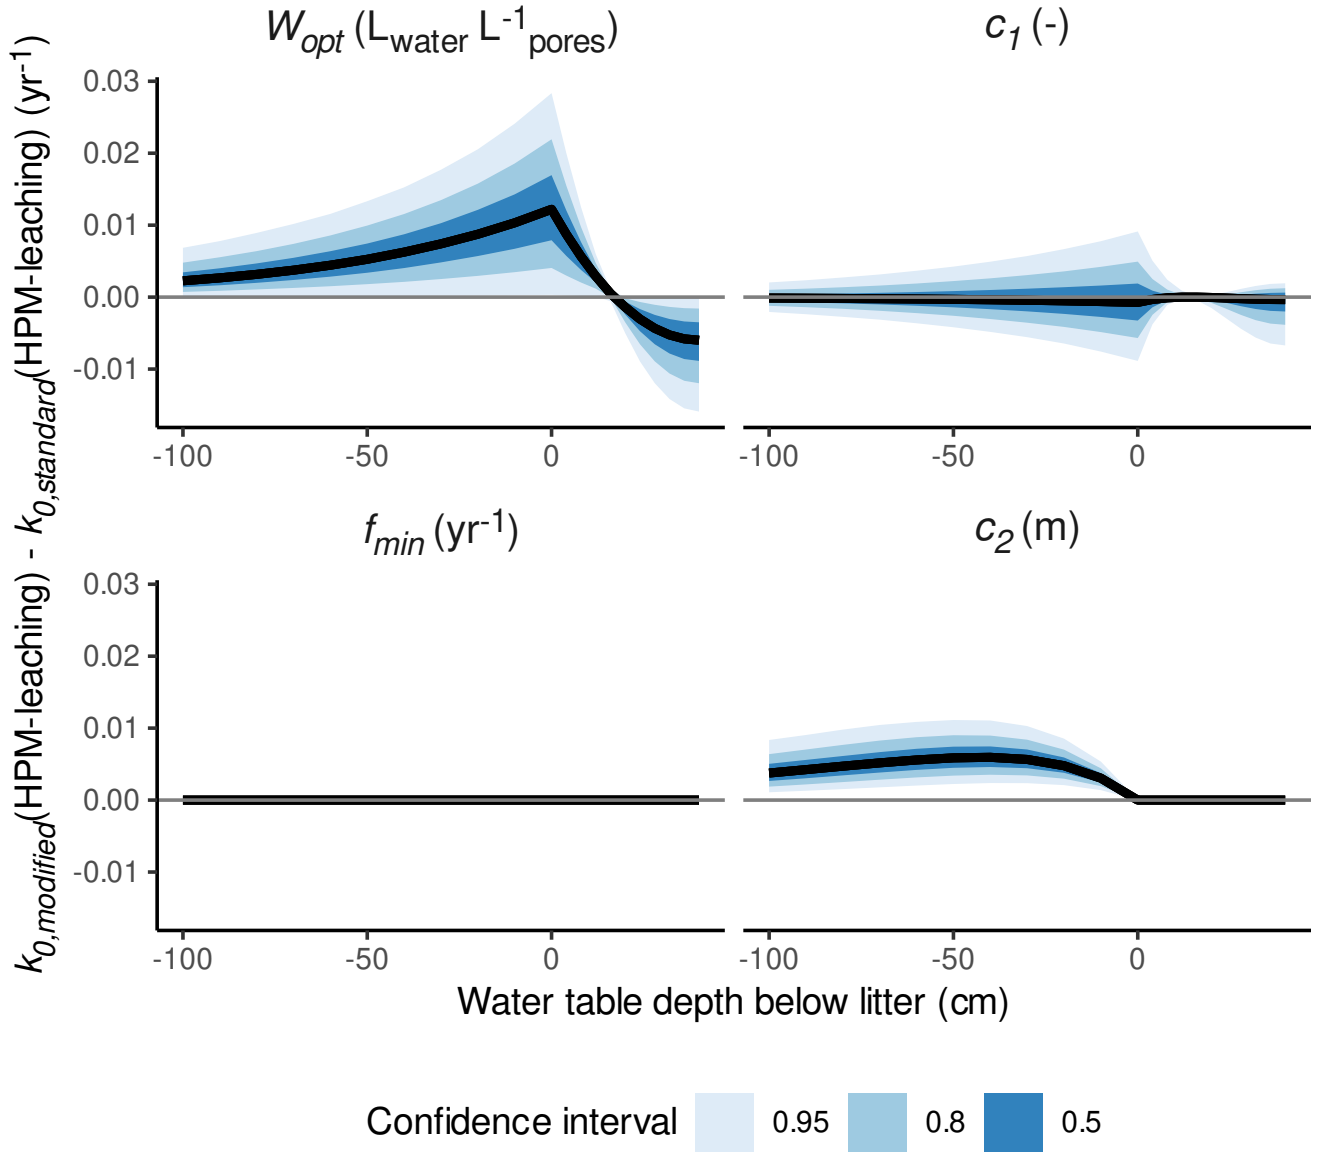

**Figure 6.** Difference between decomposition rates for *S. fuscum* predicted with parameter values estimated by HPM-leaching ( $k_{0,modified}(\text{HPM-leaching})$ ), and when setting the HPM decomposition module parameter in the panel title to its standard value ( $k_{0,standard}(\text{HPM-leaching})$ ), versus the water table depth below the litter (negative values represent litter placed below the water table, positive values represent litter placed above the water table in the unsaturated zone). Panels show results when different parameters are set to their standard values. Positive  $k_{0,modified}(\text{HPM-leaching}) - k_{0,standard}(\text{HPM-leaching})$  means that decomposition rates are larger when using the estimated parameter value compared to using the standard parameter value. Shaded areas are central confidence intervals with probabilities given in the figure legend.

### 3.3 Relation of $l_0$ to the degree of saturation

In model HPM-leaching, we included a logistic regression model that estimates the relation between  $l_0$  and the degree of saturation at which the decomposition rate is largest. Larger values mean that the largest decomposition rates are reached at larger degrees of saturation. For some species, there is a large posterior probability that  $k_{0,i}$  is smaller (*S. cuspidatum*) or larger (*S. russowii* and *S. rubellum*) than the standard value for the HPM microhabitat class we assigned them to. In addition,  $k_{0,i}$  was not consistent between HPMe-LE-peat and HPMe-LE-peat-10 and also differed between models estimated when removing portions of the data during the cross-validation (supporting Fig. S12).  $k_{0,i}$  defines how decomposition rates differ between *Sphagnum* species and is therefore an important control of C accumulation if there are vegetation changes. The parameter estimates suggest that both positive and negative relations of  $l_0$  to the degree of saturation are compatible with available litterbag data (95% confidence intervals for the slope (logit scale): (-0.28, 0.15)). Thus, available litterbag data do not allow to conclude whether  $l_0$  are positively related to the degree of saturation or not.

Of these parameters,  $c_2$ ,

## 4 Discussion

Our aims were to test whether the HPM decomposition module fits decomposition rates estimated from available litterbag experiments, to estimate HPM decomposition module parameters from available litterbag experiments, to understand what factors could cause differences in parameter estimates to the standard values, and  $k_{0,i}$  are of particular relevance for C accumulation in the HPM, as indicated by previous sensitivity analyses (Quillet et al., 2013a, b). Explaining the discrepancies and finding ways to test them more accurately than possible with available litterbag data should therefore improve our understanding of peat C accumulation to check whether the estimates from litterbag data could imply significant differences in peat accumulation predicted by the HPM compared to the standard parameter values.

The discrepancies in  $c_2$  and  $W_{opt}$  together imply smaller aerobic and larger anaerobic decomposition rates and therefore a less steep. The parameter estimates derived from available litterbag data suggest differences in the control of decomposition rates compared to the standard parameter values: the HPM decomposition module with standard parameter values predicts a steeper decrease of decomposition rates from oxic to anoxic conditions (Fig. 4). These relative rates are scaled by  $k_{0,i}$  to absolute decomposition rates. With  $k_{0,i}$  estimated from litterbag experiments, the discrepancies in and smaller anaerobic decomposition rates for several species than estimated from LDM-standard and the models that estimate HPM decomposition module parameters from available litterbag data. These differences imply larger estimates for  $W_{opt}$ , the degree of saturation where decomposition rates are maximal, and  $c_2$  and, the anoxia scale length (the parameter that controls how strong decomposition rates decrease below the water table depth). We will show here, by comparing parameter estimates to results from sensitivity analyses of the HPM, that the new parameter estimates can cause large differences in long-term peat accumulation predicted by the HPM.

Our analysis suggests that the HPM decomposition module with standard parameter values fits available litterbag data, but our modifications, where  $W_{opt}$  also indicate larger anaerobic decomposition rates than assumed by the HPM for several species



(Fig. 5). Therefore, the discrepancies to the HPM indicate a less steep decrease of decomposition rates from oxic to anoxic conditions and, at least,  $c_2$ , and (for some species)  $k_{0,i}$  estimates significantly differ from the standard values, have equivalent fit. This can be explained by two mechanisms: first, the litterbag decomposition model explains mass loss by initial leaching and decomposition. Thus, remaining masses reported in a litterbag experiment can be fitted either by assuming a larger  $l_0$  and smaller  $k_0$ , larger absolute anaerobic decomposition rates,

To illustrate that the estimated  $c_2$  or by assuming a smaller  $l_0$  and larger  $k_0$ . By this first mechanism, the litterbag decomposition model can first estimate  $k_0$  to agree with the HPM decomposition module and then adjust  $l_0$  to fit the remaining masses of the litterbag experiments. The second mechanism is the impact of the design of available *Sphagnum* litterbag experiments on the accuracy of  $l_0$  and  $W_{opt}$  imply smaller aerobic and larger anaerobic decomposition rates, we simulated decomposition of *S. fuscum* incubated at different depths in a peatland with water table depth of 40 cm below the surface, a porosity of  $0.7 \cdot L_{pores} \cdot L_{sample}^{-1}$ , and a minimum water content at the surface of  $0.05 \cdot g_{water} \cdot g_{sample}^{-1}$ . We predicted average  $k_0$  of *S. fuscum* with HPMe-LE-peat-10 ( $k_{0,modified}(HPMe-LE-peat-10)$ ) and with HPMe-LE-peat-10 setting either  $c_1$ ,  $W_{opt}$ ,  $f_{min}$ , or  $c_2$  to the standard value ( $k_{0,standard}(HPMe-LE-peat-10)$ ) and computed their differences. This gives the difference in decomposition rates of HPMe-LE-peat-10 if we would set individual HPM parameters to their standard values. We plotted this difference versus the depth of the water table below the litter (litter at the surface has a value of +40 cm, litter at the water table level of 0 cm, estimates: initial leaching losses can explain mass losses only at the start of the experiment (equation (2)), but decomposition explains a continuous mass loss. It is therefore possible to estimate  $l_0$  and litter below the water table level has negative values), as shown in Fig. 6  $k_0$  accurately when remaining masses shortly after the start of the experiment are recorded, but the majority of litterbag experiments collects the first litterbags only after half a year or later (Teickner et al., 2024b). This causes large errors in  $l_0$  and  $k_0$  estimates and therefore allows the model to adjust  $l_0$  and  $k_0$  by the first mechanism, such that all model versions have equivalent fit to remaining masses while also fitting decomposition rates suggested by different HPM decomposition module priors. Improved litterbag experiments are needed for more accurate tests of any peatland decomposition module and for obtaining parameter estimates accurate enough to allow even only approximate predictions of long-term peat accumulation. Applications of the HPM should consider this variability in parameter estimates compatible with available litterbag experiments.

With the standard  $W_{opt}$  value, HPMe-LE-peat-10 predicts larger decomposition rates above and smaller decomposition rates below the water table than when using the parameter values estimated from litterbag data. Similarly, setting  $c_2$  to its standard value also results in smaller decomposition rates below the water table level. The other parameters do not have a qualitative influence (Fig. 6). Thus, the discrepancies in  $W_{opt}$  and  $c_2$  are the main drivers of the less steep decrease of decomposition rates from oxic to anoxic conditions in HPMe-LE-peat-10 compared to the standard HPM. In the next subsections, we first evaluate the reliability of our test. We discuss whether the identified parameter value differences could be an artifact of using heterogeneous litterbag data, and we discuss how compatible the new HPM decomposition module parameter estimates are with other studies that analyzed how decomposition rates differ in dependency of water availability or that estimated  $c_2$  from peat core data. Second, we address the remaining aims: we discuss what factors could cause the larger anaerobic decomposition rates and, in some cases, smaller aerobic decomposition rates estimated by the litterbag decomposition model, and we discuss

what implications the differences between estimated and standard parameter values have for peat accumulation predicted by the HPM. Finally, we give recommendations for improving tests of peat decomposition modules.

$k_0$  predicted by HPM modifications (either HPMf-LE-peat, HPMe-LE-peat, or HPMe-LE-peat-10) minus  $k_0$  predicted by the HPM with standard parameter values (HPMf) versus estimated average water table depths below the litterbags. Points represent average estimates and error bars 95% posterior intervals. *Sphagnum* spec. are samples which that been identified only to the genus level. Only data for species with at least three replicates are shown.

Difference between decomposition rates for *S. fuscum* predicted with parameter values estimated by HPMe-LE-peat-10 ( $k_{0,modified}(HPMe-LE-peat-10)$ ), and when setting the HPM parameter in the panel title to its standard value ( $k_{0,standard}(HPMe-LE-peat-10)$ ). Panels show results when different parameters are set to their standard values. Positive  $k_{0,modified}(HPMe-LE-peat-10) - k_{0,standard}(HPMe-LE-peat-10)$  means that decomposition rates are larger when using the estimated parameter value compared to using the standard parameter value.

#### 4.1 Reliability of the identified discrepancies

Before analyzing potential causes of the discrepancies found for  $c_2$  and  $W_{opt}$  we first ask if combining different litterbag experiments is reliable evidence for the less steep gradient in decomposition rates from oxic to anoxic conditions.

If we take a look at the misfits of the standard HPM (HPMfdecomposition module (HPM-standard)) shown in Fig. 4, many, but not all underestimations of aerobic decomposition rates could have been caused by other factors: For example for *S. balticum* the difference may have been caused by differences in the two litterbag experiments from which we collected the data because the replicate with positive water table depth is from Straková et al. (2010), whereas the two others are from Mäkilä et al. (2018) –

(Fig. 4). The less pronounced gradient in measured decomposition rates above the water table depth is, however, also visible for *S. fuscum* replicates within the same study (Johnson and Damman, 1991; Golovatskaya and Nikonova, 2017; Mäkilä et al., 2018) and in addition similar across these (independent) studies (Fig. 4, supporting information S6) (Johnson and Damman, 1991; Golovatskaya et al., 2018), indicating that this pattern cannot be explained in all cases by differences between studies. In addition, during the cross-validation, we removed data from individual studies from the model and the remaining subsets still resulted in similar estimates for  $c_2$  and  $W_{opt}$  (supporting Fig. S12). Finally, numerous previous studies suggest that water table depth is an important control of decomposition rates (e.g., Blodau et al., 2004) (e.g., Blodau et al., 2004) and one may therefore expect that also between different studies decomposition rate differences should be controlled to a large degree by differences in water table depths. Thus, even with the heterogeneous litterbag data which is currently available, a less steep gradient of decomposition rates from oxic to anoxic conditions appears to be replicable between studies and species. Controlled litterbag experiments should test this. To fully rule out that this pattern may be biased by heterogeneous litterbag data and biases of the litterbag decomposition model, controlled litterbag experiments that systematically estimate decomposition rates along the gradient from oxic to anoxic conditions are needed.

The  $W_{opt}$  suggested by HPMe-LE-peat-10 is also estimate suggested by HPM-leaching is near the average optimum of heterotrophic respiration estimated across a range of mineral soils (Moyano et al., 2013). The estimate is also in line with

a study where the largest decomposition rates of the same litter type were observed at or just above the average water table level in hummocks (Belyea, 1996), and with maximum CO<sub>2</sub> production rates around 13 cm above the water table level in a mesocosm study (Blodau et al., 2004). According to the ModGberg model the degree of saturation at this depth is near the  $W_{opt}$  ~~suggested by HPM-LE-peat and HPM-LE-peat-10~~estimate suggested by HPM-all and HPM-leaching. For example, for our simulation analysis used to produce Fig. 6, the average  $W_{opt}$  estimated by model ~~HPM-LE-peat-10~~ HPM-leaching ( $0.57 L_{water} L_{pores}^{-1}$ ) is reached around 16 cm above the water table level, as shown in Fig. 7. At shallower depths, the degree of saturation decreases below the  $W_{opt}$  which estimate and this would decrease decomposition rates as observed in Belyea (1996). In contrast, according to the the ModGberg model, a degree of saturation corresponding to the standard  $W_{opt}$  value ( $0.45 L_{water} L_{pores}^{-1}$ ) is reached at shallower depths and in the same simulation with this standard  $W_{opt}$  value, no pronounced sub-surface peak in decomposition rates is observed (supporting Fig. S15). In hollows, the optimum degree of saturation suggested by ~~HPM-LE-peat-10~~ HPM-leaching is reached near the surface for either  $W_{opt}$  value (supporting Fig. S15). Thus, a larger value for  $W_{opt}$  would be compatible with results from several previous studies.

Larger and smaller  $c_2$  than the standard value have been estimated for several ~~permafrost~~ peatland cores with the HPM and a modified version of the HPM with monthly time step (~~Treat et al., 2021, 2022~~) (Quillet et al., 2015; Treat et al., 2021, 2022). Smaller values have been estimated for tropical peatlands (Kurnianto et al., 2015). To our knowledge, no litterbag experiment directly estimated  $c_2$ . A difficulty is that available litterbag experiments cover only a comparatively small depth range below the water table level (at most around 30 cm, Fig. 4) and therefore gradients in anaerobic decomposition rates across larger depths below the water table currently cannot be estimated with available litterbag data.

The estimates for the maximum possible decomposition rate ( $k_{0,i}$ ) have large errors and removal of data during the cross-validation caused larger relative differences in  $k_{0,i}$  estimates compared to  $W_{opt}$  and  $c_2$  (supporting Fig. S12). On the one hand, this variability indicates that available litterbag data are not sufficient to estimate  $k_{0,i}$  accurately and that our assignment of *Sphagnum* species to HPM PFT may not be optimal, but on the other hand, this variability may also indicate that categorizing *Sphagnum* species into three PFT may not accurately describe the variability of maximum possible decomposition rates. Several studies suggest that diverse aspects of litter chemistry may increase  $k_{0,i}$  (Turetsky et al., 2008; Bengtsson et al., 2018). However, we are not aware of studies that systematically analyze what factors control  $k_{0,i}$  within the same species.

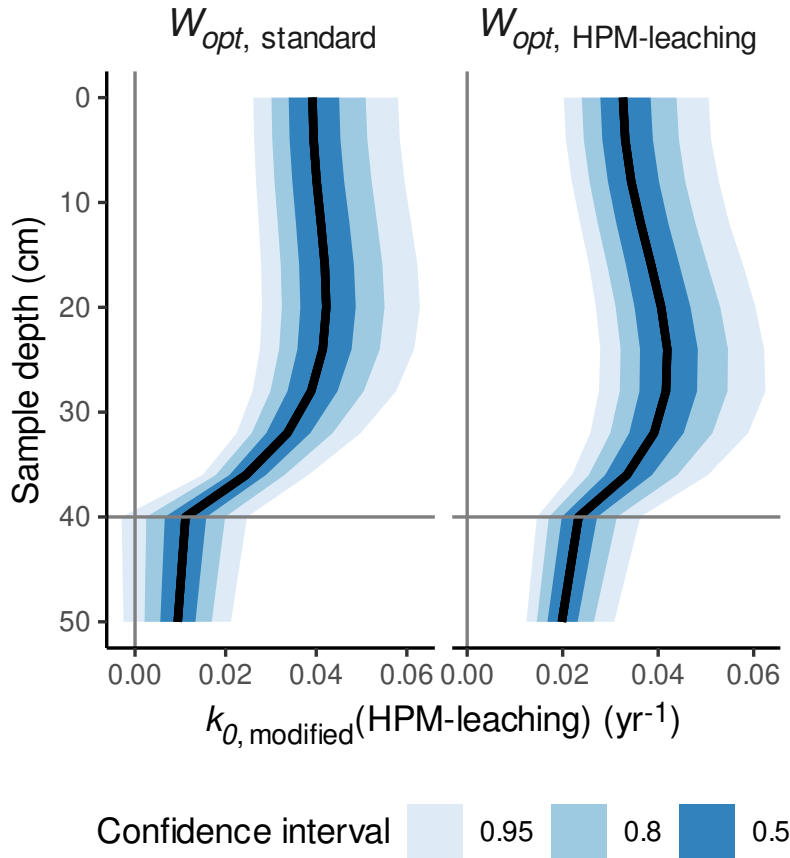

**Figure 7.** Decomposition rates predicted with ~~HPMe-LE-peat-10~~HPM-leaching ( $k_{0, \text{modified}}(\text{HPMe-LE-peat-10})$  $k_{0, \text{modified}}(\text{HPM-leaching})$ ) for *S. fuscum* (hummocks), using either the standard value for  $W_{opt}$  or the  $W_{opt}$  value estimated by ~~HPMe-LE-peat-10~~HPM-leaching versus depth of the litter below the peat surface. The horizontal line is the average water table depth. Shaded areas are central confidence intervals with probabilities given in the figure legend.

#### 4.2 Water table fluctuations may explain the discrepancies in $c_2$ and $W_{opt}$ and larger anaerobic and smaller aerobic decomposition rates.

750 The HPM decomposition module predicts decomposition rates based on average annual water table depths (Frolking et al., 2010) and ignores water table fluctuations. Our evaluation of the HPM decomposition module also assumed an average water table depth during the litterbag experiments and the HPM decomposition module translated this into a clear pronounced transition between anaerobic and aerobic decomposition rates (Fig. 4). In reality, water table depths-levels fluctuate and this causes transient and nonlinear changes in decomposition rates due to variations in the availability of oxygen and other electron  
755 acceptors, flushing of end products of anaerobic decomposition, and possibly other factors (Siegel et al., 1995; Blodau and

Moore, 2003; Blodau et al., 2004; Beer and Blodau, 2007; Knorr and Blodau, 2009; Walpen et al., 2018; Campeau et al., 2021; Kim et al., 2021; Treat et al., 2022; Obradović et al., 2023). A possible explanation why the gradient in decomposition ~~rate~~ rates from oxic to anoxic decomposition is less steep ~~,-on average-~~ across litterbag experiments, on average, than suggested by the standard HPM decomposition module could therefore be that an averaging effect of fluctuating water table levels on both aerobic and anaerobic decomposition rates is neglected by the HPM ~~,-~~ decomposition module. An additional factor may be that litterbags ~~are buried over cover~~ a depth range ~~,-but we assumed a single fixed depth.-~~ If the buried litterbags cover some depth range, this would spatially average decomposition rates and therefore the decomposition rate estimate is an average over the depth covered by the litterbag. If moisture conditions vary over this depth, the decomposition rate estimate also averages over moisture conditions, with similar effects as the temporal average caused by water table fluctuations.

~~According to our results~~ If this is the case,  $c_2$  would have to be re-interpreted as transition parameter that accounts ~~both for~~ for both limitation of anaerobic decomposition under anoxic conditions and ~~for~~ the effects of periodically oxic conditions. Similarly,  $W_{opt}$  would have to be re-interpreted as the optimum average degree of saturation for decomposition under water table level variations and its value would be necessarily different from the optimum degree of saturation for depolymerization under static degree of saturation.

Adjusting the HPM decomposition module parameters as implied by our modified models may be an easy way to account for the effect of sub-annual variation in water table levels on decomposition rates, if the discrepancies are caused by fluctuating water tables and if the model is representative for different effects variations in water table level may have on decomposition rates (e.g., ~~short-term fluctuations compared to seasonal water table variations compared to prolonged droughts~~). What we have not considered due to limited data is that  $c_2$  can be expected to depend on long-term changes in groundwater flow (~~e.g., Siegel et al. (1995)~~) (e.g., Siegel et al., 1995) or site-specific differences in hydrology and other factors (~~e.g., Treat et al. (2021)~~ ~~,-Treat et al. (2022)~~) (e.g., Froelking et al., 2010; Treat et al., 2021, 2022). Therefore,  $c_2$  ~~may can be expected to~~ differ between litterbag studies and our data only indicate that  $c_2$  is larger on average, whereas more research is necessary to estimate and understand site-specific controls of  $c_2$  and how a change in hydrology controls  $c_2$ . Similarly,  $W_{opt}$  may differ between sites and over time. It would be interesting to know whether litterbag experiments can quantify these controls and whether  $c_2$  estimated from litterbag experiments is generally larger in peatlands with larger water table fluctuations.

It is also worth mentioning that a modification of the HPM, HPM-Arctic (Treat et al., 2021), has a seasonally dynamic WTD and this modification may account for at least a part of the discrepancies we observed here. Unfortunately, most available litterbag data do not report WTD at sufficient temporal resolution to test whether standard HPM parameter values are more compatible with litterbag data when such seasonal variations in WTD are considered.

### 4.3 Implications of the discrepancies in $W_{opt}$ , $c_2$ , and $k_{0,i}$ for long-term C accumulation

A larger  $c_2$  implies larger anaerobic decomposition and may thus indicate that the HPM decomposition module underestimates anaerobic decomposition rates. Previous ~~sensitivity analyses~~ global and local sensitivity analyses, where HPM parameter values

were varied in broad ranges and environmental conditions were varied, identified  $c_2$  as influential for C accumulation in the HPM (Quillet et al., 2013a, b).

If  $c_2$  is varied within the range from the standard value (0.3 m) to the average posterior estimate from ~~HPMe-LE-peat-10~~ HPM-leaching (0.64 m), this would cause differences in predicted C accumulation of a maximum of ca. 20% in the sensitivity experiment of Quillet et al. (2013a) (depending on precipitation, Fig. 1 c in Quillet et al. (2013a)). If values are changed across the complete posterior range compatible with litterbag data and if other HPM parameters would also be varied, the effect would be even larger (Fig. 2 c in Quillet et al. (2013a)).

Due to parameter interactions and feedbacks, an increase in anaerobic decomposition rates can result in smaller or larger C accumulation of the HPM, depending on environmental conditions (Quillet et al., 2013a). Small anaerobic decomposition may cause too rapid C accumulation resulting in a low water table level, a thick aerobic zone, and thus smaller overall C accumulation after a longer time. Larger anaerobic decomposition may result in higher water table levels and this can increase C accumulation in the long-term. Too large anaerobic decomposition decreases C accumulation (Quillet et al., 2013a).

A larger  $W_{opt}$  implies that the largest aerobic decomposition rates are reached under more saturated conditions.  $W_{opt}$  has not been identified as influential in a sensitivity analysis of the HPM (Quillet et al., 2013a), but as shown above, it contributes to the less steep decrease of decomposition rates from oxic to anoxic conditions. Importantly, since the HPM does not have a seasonally resolved water table depth, the two sensitivity analyses did not consider how seasonal variations of the water table depth may control long-term C accumulation, and consequently the re-interpreted  $W_{opt}$  may be more important to long-term C accumulation than previously assumed. In addition, ~~HPMe-LE-peat-10~~ HPM-leaching suggests an average  $W_{opt}$  value of 0.57  $L_{water} L_{pores}^{-1}$ , which is outside the range of values tested in Quillet et al. (2013a) (0.3 to 0.5  $L_{water} L_{pores}^{-1}$ ). This implies that the sensitivity of long-term C accumulation to  $W_{opt}$  has been evaluated over a too small range.

A larger  $k_{0,i}$  increases decomposition rates for a species and *Sphagnum*  $k_{0,i}$  are particularly relevant for many peatlands because the bulk of the peat is *Sphagnum* peat. In the sensitivity analysis in Quillet et al. (2013b),  $k_{0,hummock}$  had large interaction effects with other parameters of the HPM and therefore could either cause larger or smaller peat accumulation, depending on environmental conditions, other parameters, and what vegetation shifts occur in a specific case. Similar to  $W_{opt}$ , our  $k_{0,i}$  estimates have errors that are larger than the range of values tested in Quillet et al. (2013b). For example, for hummock *Sphagnum*,  $k_{0,i}$  was varied from 0.04 to 0.06  $yr^{-1}$ , whereas average estimates for  $k_{0,i}$  of HPM-leaching for species assigned to the hummock PFT range from 0.04 to 0.19  $yr^{-1}$ . As mentioned above, this range of  $k_{0,i}$  estimates may be biased because of the difficulty to assign *Sphagnum* species to HPM PFT, but from a different perspective, this is an additional error source for  $k_{0,i}$  estimates that should be considered in sensitivity analyses unless more evidence becomes available to define PFT and their maximum possible decomposition rates.

A further aspect that needs to be considered is that ~~HPMe-LE-peat and HPMe-LE-peat-10~~ HPM-all and HPM-leaching estimate parameter distributions based on available data, whereas existing studies defined fixed parameter values or ranges of parameter values based on expert knowledge. Based on Quillet et al. (2013a), the uncertainties would cause non-negligible differences in predicted long-term C accumulation. For example, values within the uncertainty range of  $c_2$  estimated by ~~HPMe-LE-peat-10~~ HPM-leaching ((0.4, 0.97), 95% confidence interval), would imply differences up to 100  $kg\ m^{-2}$  of ac-

825 cumulated C over 5000 years in some simulations (Fig. 1 (c) in Quillet et al. (2013a), with a maximum total accumulation of ca. 430 kg<sub>C</sub> m<sup>-2</sup>). Simulations of remaining masses for different *Sphagnum* species under different conditions also indicate large uncertainties in predicted remaining masses (supporting info S9). This implies that more work is required to estimate parameters accurately enough to detect even relative large differences among peatland models and between model predictions and peat cores.

830 Summarized, based on existing sensitivity analyses of the HPM the parameter discrepancies suggested by ~~HPMe-LE-peat~~ and ~~HPMe-LE-peat-l0~~ HPM-all and HPM-leaching can translate into non-negligible differences in long-term C accumulation rates. They also imply gaps in previous sensitivity analyses of the HPM, namely that  $W_{opt}$  ~~has~~ and possibly  $k_{0,i}$  (for some species) have been analyzed over a too restricted value range and may play a more important role if water table fluctuations are taken into account.

#### 4.4 How can we improve tests of peatland decomposition modules?

835 We ~~found some discrepancies between the maximum potential decomposition rates ( $k_{0,i}$ ) HPMe-LE-peat-l0 estimated for some species and the standard HPM values after assigning species to the three HPM microhabitat PFT (hollow, lawn, hummock *Sphagnum* mosses), however as noted above, these discrepancies were neither consistent between the two modifications of the HPM (HPMe-LE-peat and HPMe-LE-peat-l0) (supporting information S5), nor when HPMe-LE-peat-l0 was fitted to different subsets of the data during cross-validation (supporting Fig.S12).~~ suggest the following steps to estimate peatland decomposition module parameters more accurately and therefore also to improve the accuracy of tests of peatland decomposition modules:

840 ~~Altogether, this indicates that the  $k_{0,i}$  for many of the~~

1. High temporal resolution measurements of WTD: For many available litterbag studies, it is not clear whether reported WTD estimates are unbiased estimates of average WTD (i.e., are derived from high-resolution measurements during the incubation) or biased (due to a too small temporal resolution or coverage). This limitation could be reduced by reporting high temporal resolution WTD measurements along litterbag experiments. Such data are also necessary to investigate whether HPM decomposition module parameters are controlled by WTD fluctuations.
  2. Eliminate the need of auxiliary models to estimate the degree of saturation: There is a lack of data on the degree of saturation (or porosity and volumetric water content, from which the degree of saturation could be computed) for available litterbag experiments. For this reason, we used the modified Granberg model to estimate the degree of saturation based on reported WTD and an assumed peat porosity. The modified Granberg model, reported WTD, and our assumed peat porosity are error sources for our test. This limitation could be reduced by measurements of peat porosity and high temporal resolution measurements of volumetric water content during litterbag experiments.
  3. ~~Implementing a standard for how to assign *Sphagnum* species are difficult to estimate from available litterbag data and more research should address this task. For example, HPMe-LE-peat-l0 could be extended, with suitable data, by modelling how  $k_{0,i}$  is controlled by factors such as temperature or within-species differences in litter chemistry.~~
- 855



We expect that better estimating  $k_{0,i}$  is an important step to improve the predictive accuracy of the HPM because the cross-validation of HPMe-LE-peat-10 indicated a larger  $\text{RMSE}_{\text{test}}$  than  $\text{RMSE}_{\text{train}}$ , with only small variability in estimates of  $c_1$ ,  $W_{\text{opt}}$ ,  $f_{\text{min}}$ , and  $c_2$ , but much more variability in estimates of  $k_{0,i}$ . This indicates that a large part of the difference between  $\text{RMSE}_{\text{test}}$  and  $\text{RMSE}_{\text{train}}$  of HPMe-LE-peat-10 may be explained by missing information about  $k_{0,i}$ .

species to model PFT: The HPM does not specify how to assign *Sphagnum* species to PFT (Frolking et al., 2010), which makes it difficult to compare litterbag experiments to parameters for HPM PFT. Ideally, peatland models should provide lists of species they assign to certain PFT to facilitate tests. Moreover, as noted above,  $k_{0,i}$  scales the relative differences in anaerobic versus aerobic decomposition rates to absolute decomposition rates. For example, as shown in Fig. 5, HPMe-LE-peat-10 indicates that the standard HPM underestimates aerobic and anaerobic decomposition rates for *S. angustifolium*. available niche data used here to assign species to PFT may be biased by short term measurements during summer that are not in line with average niches defined in peatland models, similar to how transfer model for testate amoebae are suggested to be biased (Swindles et al., 2015).

4. Decreasing errors in  $k_0$  and *S. magellanicum-aggr.* litterbag data, whereas for *S. fuscum* only anaerobic decomposition rates are underestimated.

Values of  $l_0$  estimates from litterbag experiments: Our analysis suggests that a comparatively large range of  $c_2$ ,  $W_{\text{opt}}$ , and  $k_{0,i}$  can be estimated more accurately if decomposition rates in the litterbag experiments can be estimated more accurately and there is again a direct link to estimates in the HPM decomposition module are compatible with available litterbag data because errors in remaining masses are large enough to support a range of  $k_0$  and  $l_0$  estimates and because of deficiencies in the design of the litterbag experiments. As a consequence,  $k_0$  estimates of the litterbag decomposition model can be adjusted to fit predictions of the HPM decomposition module for a range of HPM decomposition module parameter values. We also assume that because of these large errors and a large variability of initial leaching losses : Our analysis of differences in behavior of HPMf, HPMf-LE-peat, HPMe-LE-peat, and HPMe-LE-peat-10 suggests that HPMf-LE-peat due to differences in litter handling (Teickner et al., 2024b), we could not detect an expected positive relation of  $l_0$  to the degree of saturation (Lind et al., 2022). Future litterbag experiments that aim to improve peatland models should reduce errors of  $k_0$  and  $l_0$  estimates (e.g., Teickner et al., 2024b).

5. Systematic litterbag experiments along the gradient from oxic to anoxic conditions: There are few litterbag experiments available that systematically analyze how decomposition rates differ along the gradient from oxic to anoxic conditions. Problems are that many studies test only few conditions and do not cover depth ranges large enough to estimate the minimum decomposition rate ( $f_{\text{min}}$ ) and HPMe-LE-peat produced smaller decomposition rate estimates and larger initial leaching loss estimates to make the litterbag data compatible with the (smaller predictions of the ) HPM, whereas HPMe-LE-peat-10 did not (Fig. ??) and consequently had larger estimates for  $k_{0,i}$  than the other two models (Fig. 4). Thus, more accurate estimation of initial leaching losses — which vary a lot for  $c_2$ . An ideal study would use litter material of the same species between different studies (Teickner et al., 2024b) — should make decomposition rate



estimates more accurate, and this should improve accuracy of and origin (thus making sure  $k_{0,i}$  in the HPM, according to our analyses.

## 5 Conclusions

Estimating HPM parameters from *Sphagnum* litterbag experiments suggests larger anaerobic decomposition rates and a less steep gradient of decomposition rates (would be the same for all replicates) and systematically record remaining masses under different degrees of saturation in the same peat material to accurately estimate  $W_{opt}$  and  $c_1$ . Another ideal study would systematically record remaining masses at many depth levels, and deeper than 30 cm below the average annual WTD to allow accurate estimation of  $c_2$ . Similar experiments could be used to estimate how WTD fluctuations affect decomposition rates along the gradient from oxic to anoxic conditions than implied by the HPM with standard parameter values. With these modifications, the HPM fits available litterbag data within the range of uncertainties. However, due to large uncertainties in available litterbag data, particularly about how much of the mass is lost due to initial leaching and how this would change estimates for  $W_{opt}$  and how much due to decomposition, the HPM with standard values can achieve comparable fits if mass loss in litterbag experiments is explained by larger  $c_2$ .

6. Understanding the controls of  $k_{0,i}$ : Values of  $k_{0,i}$  can be assumed to be controlled, among other factors, by litter chemistry. Even though there are studies that analyze how litter chemistry controls decomposition rates (e.g., Turetsky et al., 2008), there are few that do this systematically (e.g., Bengtsson et al., 2018) and these do not consider initial leaching losses and thus may confound initial leaching and slower subsequent decomposition. Therefore, stronger tests of the HPM require more accurate estimates for initial leaching losses and decomposition rates.

The larger anaerobic decomposition rates and less steep gradient of decomposition rates from oxic to anoxic conditions compared to the HPM with standard parameter values are a consequence of larger estimates for the anoxia scale length ( $c_2$ ) and the optimum degree of saturation for decomposition ( $W_{opt}$ ). This discrepancy may be caused by neglecting an increase of decomposition rates below the annual average water table depth due to water table fluctuations, differences in groundwater flow, or spatial averaging in litterbag experiments. Our estimates may be an easy way to account for such effects in the HPM if effects of these fluctuations on decomposition rates can be averaged over time as implied by the suggested parameter, both of which may depend on initial litter chemistry. Studies that systematically change litter chemistry within species would be required to estimate  $k_{0,i}$ . These estimates would also be useful to define PFT for decomposition modules.

7. Understanding how  $c_2$  and  $W_{opt}$  vary between sites and in dependency of peat characteristics: Too few litterbag experiments with too few replicates are available to estimate  $c_2$  and  $W_{opt}$  separately for individual sites (or how they may vary over time). Systematic litterbag experiments are needed to estimate how environmental conditions control the magnitude of these parameters, for example due to temporal variations in water and oxygen availability or differences in availability of alternative electron acceptors under anoxic conditions.

Systematic and high-quality litterbag experiments that are designed specifically to test peatland decomposition modules are required to achieve these improvements. To support the design of such experiments, we created an R package (hpmpredict, supporting information S10) that allows to make predictions with HPM-leaching for hypothetical litterbag experiments and that also allows to change parameter values (Teickner and Knorr, 2024a). This could for example be useful to estimate the sample sizes that are required to detect specific differences in remaining masses, to test to what extent litterbag experiments are compatible with HPM-leaching, or to analyze the effect of changing HPM decomposition module parameter values from the standard values or our estimates.

~~Less limitation of anaerobic decomposition rates than suggested by the HPM would~~

## 5 Conclusions

Based on the litterbag data, the degree of saturation where decomposition is largest ( $W_{opt}$ ) and the anoxia scale length ( $c_2$ , controls how fast decomposition rates decrease below the average annual WTD) are significantly larger than the standard parameter values. Moreover, maximum possible decomposition rates ( $k_{0,i}$ ) for individual species are overall more variable than implied by the standard HPM decomposition module parameter values. According to previous sensitivity analyses, these parameter estimates imply differences in predicted C accumulation rates of up to  $100 \text{ kg}_C \text{ m}^{-2}$  over 5000 years (with a maximum total C accumulation of ca.  $430 \text{ kg}_C \text{ m}^{-2}$ ), according to previous sensitivity analyses. Future litterbag experiments should improve the accuracy of when compared to the standard parameter values. The differences in HPM parameter estimates imply larger anaerobic decomposition rates for several species and a less steep gradient of decomposition rates from oxic to anoxic conditions. This pattern may be caused by water table fluctuations, differences in groundwater flow, or spatial averaging in litterbag experiments; factors that are currently not explicitly considered both in the HPM decomposition module and available litterbag experiments.

Our analysis suggests that the HPM decomposition module with standard parameter values fits available *Sphagnum* litterbag data, but model versions where HPM decomposition module parameters were estimated from available litterbag data have an equivalent fit. This is caused by two mechanisms: First, remaining masses in litterbag experiments can be explained by initial leaching losses and decomposition. If remaining masses are reported only some time after the initial leaching loss and decomposition rate estimates and then test whether the identified parameter discrepancies are reproducible and whether they can be described by known, but not yet fully quantified, controls of decomposition rates in dependency of water table fluctuations has happened, they can be explained either by small initial leaching losses and a large decomposition rate or by large initial leaching losses and a smaller decomposition rate. Second, the majority of available *Sphagnum* litterbag experiments reports remaining masses only a long time after the initial leaching loss happened. Taken together, this means that available litterbag data are compatible with a broad range of decomposition rates suggested by HPM decomposition module versions with large differences in parameter values. Improved litterbag experiments are needed for more accurate tests of any peatland decomposition module and for obtaining parameter estimates accurate enough to allow even only approximate predictions of long-term peat accumulation. Applications of the HPM and any other peatland model that relies on litterbag data to

parameterize its decomposition process should consider that a broad range of decomposition module parameter values is compatible with available litterbag experiments.

The modeling approach used here can be combined with different data sources and peatland decomposition modules and therefore may serve as blueprint for future tests and to obtain more accurate parameter estimates once improved litterbag experiments are available. In light of the large differences in long-term peat accumulation suggested by the parameter estimates, we conclude that it is worth to conduct such litterbag experiments, not only to improve the decomposition module of the HPM, but to improve peatland models in general.

*Code and data availability.* Data and code to reproduce this manuscript are available from Teickner et al. (2024a). The data used in this study are derived from Teickner and Knorr (2024b). An R package to make predictions for litterbag experiments with model HPM-leaching is available from Teickner and Knorr (2024a).

*Author contributions.* HT: Conceptualization, methodology, software, validation, formal analysis, investigation, data curation, writing - original draft, visualization, project administration. EP: supervision, funding acquisition, writing - review & editing. KHK: supervision, funding acquisition, writing - review & editing.

*Competing interests.* The authors declare no competing interests.

*Acknowledgements.* This study was funded by the Deutsche Forschungsgemeinschaft (DFG, German Research Foundation) grant no. KN 929/23-1 to Klaus-Holger Knorr and grant no. PE 1632/18-1 to Edzer Pebesma.

- Asada, T. and Warner, B. G.: Surface Peat Mass and Carbon Balance in a Hypermaritime Peatland, *Soil Science Society of America Journal*, 69, 549–562, <https://doi.org/10.2136/sssaj2005.0549>, 2005.
- Bartsch, I. and Moore, T. R.: A Preliminary Investigation of Primary Production and Decomposition in Four Peatlands near Schefferville, Québec, *Canadian Journal of Botany*, 63, 1241–1248, <https://doi.org/10.1139/b85-171>, 1985.
- 975 Bauer, I. E.: Modelling Effects of Litter Quality and Environment on Peat Accumulation over Different Time-Scales: Peat Accumulation over Different Time-Scales, *Journal of Ecology*, 92, 661–674, <https://doi.org/10.1111/j.0022-0477.2004.00905.x>, 2004.
- Beer, J. and Blodau, C.: Transport and Thermodynamics Constrain Belowground Carbon Turnover in a Northern Peatland, *Geochimica et Cosmochimica Acta*, 71, 2989–3002, <https://doi.org/10.1016/j.gca.2007.03.010>, 2007.
- Belyea, L. R.: Separating the Effects of Litter Quality and Microenvironment on Decomposition Rates in a Patterned Peatland, *Oikos*, 77, 529–539, <https://doi.org/10.2307/3545942>, 1996.
- 980 Bengtsson, F., Rydin, H., and Hájek, T.: Biochemical Determinants of Litter Quality in 15 Species of *Sphagnum*, *Plant and Soil*, 425, 161–176, <https://doi.org/10.1007/s11104-018-3579-8>, 2018.
- Blodau, C. and Moore, T. R.: Experimental Response of Peatland Carbon Dynamics to a Water Table Fluctuation, *Aquatic Sciences - Research Across Boundaries*, 65, 47–62, <https://doi.org/10.1007/s000270300004>, 2003.
- 985 Blodau, C., Basiliko, N., and Moore, T. R.: Carbon Turnover in Peatland Mesocosms Exposed to Different Water Table Levels, *Biogeochemistry*, 67, 331–351, <https://doi.org/10.1023/B:BIOG.0000015788.30164.e2>, 2004.
- Bona, K. A., Hilger, A., Burgess, M., Wozney, N., and Shaw, C.: A Peatland Productivity and Decomposition Parameter Database, *Ecology*, 99, 2406–2406, <https://doi.org/10.1002/ecy.2462>, 2018.
- Bona, K. A., Shaw, C., Thompson, D. K., Hararuk, O., Webster, K., Zhang, G., Voicu, M., and Kurz, W. A.: The Canadian Model for Peatlands (CaMP): A Peatland Carbon Model for National Greenhouse Gas Reporting, *Ecological Modelling*, 431, 109 164, <https://doi.org/10.1016/j.ecolmodel.2020.109164>, 2020.
- 990 Breeuwer, A., Heijmans, M., Robroek, B. J. M., Limpens, J., and Berendse, F.: The Effect of Increased Temperature and Nitrogen Deposition on Decomposition in Bogs, *Oikos*, 117, 1258–1268, <https://doi.org/10.1111/j.0030-1299.2008.16518.x>, 2008.
- Campeau, A., Vachon, D., Bishop, K., Nilsson, M. B., and Wallin, M. B.: Autumn Destabilization of Deep Porewater CO<sub>2</sub> Store in a Northern Peatland Driven by Turbulent Diffusion, *Nature Communications*, 12, 6857, <https://doi.org/10.1038/s41467-021-27059-0>, 2021.
- 995 Chaudhary, N., Miller, P. A., and Smith, B.: Biotic and Abiotic Drivers of Peatland Growth and Microtopography: A Model Demonstration, *Ecosystems*, 21, 1196–1214, <https://doi.org/10.1007/s10021-017-0213-1>, 2018.
- Clymo, R. S., Turunen, J., and Tolonen, K.: Carbon Accumulation in Peatland, *Oikos*, 81, 368–388, <https://doi.org/10.2307/3547057>, 1998.
- Frolking, S., Roulet, N. T., Moore, T. R., Richard, P. J. H., Lavoie, M., and Muller, S. D.: Modeling Northern Peatland Decomposition and Peat Accumulation, *Ecosystems*, 4, 479–498, <https://doi.org/10.1007/s10021-001-0105-1>, 2001.
- 1000 Frolking, S., Roulet, N. T., Tuittila, E., Bubier, J. L., Quillet, A., Talbot, J., and Richard, P. J. H.: A New Model of Holocene Peatland Net Primary Production, Decomposition, Water Balance, and Peat Accumulation, *Earth System Dynamics*, 1, 1–21, <https://doi.org/10.5194/esd-1-1-2010>, 2010.
- Frolking, S., Talbot, J., Jones, M. C., Treat, C. C., Kauffman, J. B., Tuittila, E.-S., and Roulet, N.: Peatlands in the Earth's 21st Century Climate System, *Environmental Reviews*, 19, 371–396, <https://doi.org/10.1139/a11-014>, 2011.
- 1005

- Gelman, A., Carlin, J., Stern, H., Dunson, D., Vehtari, A., and Rubin, D. B.: Bayesian Data Analysis, Chapman & Hall/CRC Texts in Statistical Science, CRC Press, Boca Raton, third edition edn., ISBN 978-1-4398-4095-5, 2014.
- Golovatskaya, E. A. and Nikonova, L. G.: The Influence of the Bog Water Level on the Transformation of Sphagnum Mosses in Peat Soils of Oligotrophic Bogs, Eurasian Soil Science, 50, 580–588, <https://doi.org/10.1134/S1064229317030036>, 2017.
- 1010 Granberg, G., Grip, H., Löfvenius, M. O., Sundh, I., Svensson, B. H., and Nilsson, M.: A Simple Model for Simulation of Water Content, Soil Frost, and Soil Temperatures in Boreal Mixed Mires, Water Resources Research, 35, 3771–3782, <https://doi.org/10.1029/1999WR900216>, 1999.
- Hagemann, U. and Moroni, M. T.: Moss and Lichen Decomposition in Old-Growth and Harvested High-Boreal Forests Estimated Using the Litterbag and Minicontainer Methods, Soil Biology and Biochemistry, 87, 10–24, <https://doi.org/10.1016/j.soilbio.2015.04.002>, 2015.
- 1015 Hassel, K., Kyrkjeeide, M. O., Yousefi, N., Prestø, T., Stenøien, H. K., Shaw, J. A., and Flatberg, K. I.: *Sphagnum Divinum* (Sp. Nov.) and *S. Medium* Limpr. and Their Relationship to *S. Magellanicum* Brid., Journal of Bryology, 40, 197–222, <https://doi.org/10.1080/03736687.2018.1474424>, 2018.
- Hayward, P. M. and Clymo, R. S.: Profiles of Water Content and Pore Size in *Sphagnum* and Peat, and Their Relation to Peat Bog Ecology, Proceedings of the Royal Society of London. Series B, Biological Sciences, 215, 299–325, 1982.
- 1020 Heijmans, M. M., Mauquoy, D., Van Geel, B., and Berendse, F.: Long-term Effects of Climate Change on Vegetation and Carbon Dynamics in Peat Bogs, Journal of Vegetation Science, 19, 307–320, <https://doi.org/10.3170/2008-8-18368>, 2008.
- Heinemeyer, A., Croft, S., Garnett, M. H., Gloor, E., Holden, J., Lomas, M. R., and Ineson, P.: The MILLENNIA Peat Cohort Model: Predicting Past, Present and Future Soil Carbon Budgets and Fluxes under Changing Climates in Peatlands, Climate Research, 45, 207–226, <https://doi.org/10.3354/cr00928>, 2010.
- 1025 Hoffman, M. D. and Gelman, A.: The No-U-turn Sampler: Adaptively Setting Path Lengths in Hamiltonian Monte Carlo, Journal of Machine Learning Research, 15, 1593–1623, 2014.
- Johnson, L. C. and Damman, A. W. H.: Species-Controlled *Sphagnum* Decay on a South Swedish Raised Bog, Oikos, 61, 234, <https://doi.org/10.2307/3545341>, 1991.
- Johnson, M. G., Granath, G., Tahvanainen, T., Pouliot, R., Stenøien, H. K., Rochefort, L., Rydin, H., and Shaw, A. J.: Evolution of Niche Preference in *Sphagnum* Peat Mosses, Evolution, 69, 90–103, <https://doi.org/10.1111/evo.12547>, 2015.
- 1030 Kallioinen, N., Paananen, T., Bürkner, P.-C., and Vehtari, A.: Detecting and Diagnosing Prior and Likelihood Sensitivity with Power-Scaling, Statistics and Computing, 34, 57, <https://doi.org/10.1007/s11222-023-10366-5>, 2024.
- Kettridge, N. and Baird, A.: In Situ Measurements of the Thermal Properties of a Northern Peatland: Implications for Peatland Temperature Models, Journal of Geophysical Research: Earth Surface, 112, <https://doi.org/10.1029/2006JF000655>, 2007.
- 1035 Kim, J., Rochefort, L., Hogue-Hugron, S., Alqulaiti, Z., Dunn, C., Pouliot, R., Jones, T. G., Freeman, C., and Kang, H.: Water Table Fluctuation in Peatlands Facilitates Fungal Proliferation, Impedes *Sphagnum* Growth and Accelerates Decomposition, Frontiers in Earth Science, 8, 9, 2021.
- Knorr, K.-H. and Blodau, C.: Impact of Experimental Drought and Rewetting on Redox Transformations and Methanogenesis in Mesocosms of a Northern Fen Soil, Soil Biology and Biochemistry, 41, 1187–1198, <https://doi.org/10.1016/j.soilbio.2009.02.030>, 2009.
- 1040 Kurnianto, S., Warren, M., Talbot, J., Kauffman, B., Murdiyarso, D., and Frohling, S.: Carbon Accumulation of Tropical Peatlands over Millennia: A Modeling Approach, Global Change Biology, 21, 431–444, <https://doi.org/10.1111/gcb.12672>, 2015.
- Lind, L., Harbicht, A., Bergman, E., Edwartz, J., and Eckstein, R. L.: Effects of Initial Leaching for Estimates of Mass Loss and Microbial Decomposition—Call for an Increased Nuance, Ecology and Evolution, 12, <https://doi.org/10.1002/ece3.9118>, 2022.

- Liu, H. and Lennartz, B.: Hydraulic Properties of Peat Soils along a Bulk Density Gradient-A Meta Study, *Hydrological Processes*, 33, 101–114, <https://doi.org/10.1002/hyp.13314>, 2019.
- Loisel, J., van Bellen, S., Pelletier, L., Talbot, J., Hugelius, G., Karran, D., Yu, Z., Nichols, J., and Holmquist, J.: Insights and Issues with Estimating Northern Peatland Carbon Stocks and Fluxes since the Last Glacial Maximum, *Earth-Science Reviews*, 165, 59–80, <https://doi.org/10.1016/j.earscirev.2016.12.001>, 2017.
- Mäkilä, M., Säävuori, H., Grundström, A., and Suomi, T.: *Sphagnum* Decay Patterns and Bog Microtopography in South-Eastern Finland, *Mires and Peat*, pp. 1–12, <https://doi.org/10.19189/MaP.2017.OMB.283>, 2018.
- Morris, P. J., Baird, A. J., and Belyea, L. R.: The DigiBog Peatland Development Model 2: Ecohydrological Simulations in 2D, *Ecohydrology*, 5, 256–268, <https://doi.org/10.1002/eco.229>, 2012.
- Moyano, F. E., Manzoni, S., and Chenu, C.: Responses of Soil Heterotrophic Respiration to Moisture Availability: An Exploration of Processes and Models, *Soil Biology and Biochemistry*, 59, 72–85, <https://doi.org/10.1016/j.soilbio.2013.01.002>, 2013.
- Nichols, J. E. and Peteet, D. M.: Rapid Expansion of Northern Peatlands and Doubled Estimate of Carbon Storage, *Nature Geoscience*, 12, 917–921, <https://doi.org/10.1038/s41561-019-0454-z>, 2019.
- Obradović, N., Joshi, P., Arn, S., Aeppli, M., Schroth, M. H., and Sander, M.: Reoxidation of Reduced Peat Organic Matter by Dissolved Oxygen: Combined Laboratory Column-breakthrough Experiments and In-field Push-pull Tests, *Journal of Geophysical Research: Biogeosciences*, 128, e2023JG007 640, <https://doi.org/10.1029/2023JG007640>, 2023.
- Prevost, M., Belleau, P., and Plamondon, A. P.: Substrate Conditions in a Treed Peatland: Responses to Drainage, *Écoscience*, 4, 543–554, <https://doi.org/10.1080/11956860.1997.11682434>, 1997.
- Quillet, A., Frohking, S., Garneau, M., Talbot, J., and Peng, C.: Assessing the Role of Parameter Interactions in the Sensitivity Analysis of a Model of Peatland Dynamics, *Ecological Modelling*, 248, 30–40, <https://doi.org/10.1016/j.ecolmodel.2012.08.023>, 2013a.
- Quillet, A., Garneau, M., and Frohking, S.: Sobol' Sensitivity Analysis of the Holocene Peat Model: What Drives Carbon Accumulation in Peatlands?, *Journal of Geophysical Research: Biogeosciences*, 118, 203–214, <https://doi.org/10.1029/2012JG002092>, 2013b.
- Quillet, A., Garneau, M., Van Bellen, S., Frohking, S., and Tuittila, E.-S.: Integration of Palaeohydrological Proxies into a Peatland Model: A New Tool for Palaeoecological Studies, *Ecohydrology*, 8, 214–229, <https://doi.org/10.1002/eco.1501>, 2015.
- R Core Team: R: A Language and Environment for Statistical Computing, Vienna, Austria, 2022.
- Rydin, H., Jeglum, J. K., and Bennett, K. D.: *The Biology of Peatlands, Biology of Habitats*, Oxford University Press, Oxford, 2nd ed edn., ISBN 978-0-19-960299-5 978-0-19-960300-8, 2013.
- Scheffer, R. A., Van Logtestijn, R. S. P., and Verhoeven, J. T. A.: Decomposition of *Carex* and *Sphagnum* Litter in Two Mesotrophic Fens Differing in Dominant Plant Species, *Oikos*, 92, 44–54, <https://doi.org/10.1034/j.1600-0706.2001.920106.x>, 2001.
- Siegel, D. I., Reeve, A. S., Glaser, P. H., and Romanowicz, E. A.: Climate-Driven Flushing of Pore Water in Peatlands, *Nature*, 374, 531–533, <https://doi.org/10.1038/374531a0>, 1995.
- Stan Development Team: Stan Modeling Language Users Guide and Reference Manual, 2021a.
- Stan Development Team: RStan: The R Interface to Stan, 2021b.
- Straková, P., Anttila, J., Spetz, P., Kitunen, V., Tapanila, T., and Laiho, R.: Litter Quality and Its Response to Water Level Drawdown in Boreal Peatlands at Plant Species and Community Level, *Plant and Soil*, 335, 501–520, <https://doi.org/10.1007/s11104-010-0447-6>, 2010.
- Swindles, G. T., Holden, J., Raby, C. L., Turner, T. E., Blundell, A., Charman, D. J., Menberu, M. W., and Kløve, B.: Testing Peatland Water-Table Depth Transfer Functions Using High-Resolution Hydrological Monitoring Data, *Quaternary Science Reviews*, 120, 107–117, <https://doi.org/10.1016/j.quascirev.2015.04.019>, 2015.

- Szumigalski, A. R. and Bayley, S. E.: Decomposition along a Bog to Rich Fen Gradient in Central Alberta, Canada, *Canadian Journal of Botany*, 74, 573–581, <https://doi.org/10.1139/b96-073>, 1996.
- Teickner, H. and Knorr, K.-H.: hpmddpredict: Predictions with Model HPMe-LE-peat-l0 from Teickner et al. (2024), Zenodo, <https://doi.org/10.5281/ZENODO.11339733>, 2024a.
- Teickner, H. and Knorr, K.-H.: Peatland Decomposition Database (1.0.0), <https://doi.org/10.5281/ZENODO.11276065>, 2024b.
- Teickner, H., Pebesma, E., and Knorr, K.-H.: Compendium of R Code and Data for "A Synthesis of *Sphagnum* Litterbag Experiments: Initial Leaching Losses Bias Decomposition Rate Estimates" and "Underestimation of Anaerobic Decomposition Rates in *Sphagnum* Litterbag Experiments by the Holocene Peatland Model Depends on Initial Leaching Losses", Zenodo, <https://doi.org/10.5281/ZENODO.11472955>, 2024a.
- Teickner, H., Pebesma, E., and Knorr, K.-H.: A Synthesis of *Sphagnum* Litterbag Experiments: Initial Leaching Losses Bias Decomposition Rate Estimates, <https://doi.org/10.5194/egusphere-2024-1686>, 2024b.
- Thormann, M. N., Bayley, S. E., and Currah, R. S.: Comparison of Decomposition of Belowground and Aboveground Plant Litters in Peatlands of Boreal Alberta, Canada, *Canadian Journal of Botany*, 79, 9–22, <https://doi.org/10.1139/b00-138>, 2001.
- Treat, C. C., Jones, M. C., Alder, J., Sannel, A. B. K., Camill, P., and Frohking, S.: Predicted Vulnerability of Carbon in Permafrost Peatlands with Future Climate Change and Permafrost Thaw in Western Canada, *Journal of Geophysical Research: Biogeosciences*, 126, e2020JG005872, <https://doi.org/10.1029/2020JG005872>, 2021.
- Treat, C. C., Jones, M. C., Alder, J., and Frohking, S.: Hydrologic Controls on Peat Permafrost and Carbon Processes: New Insights from Past and Future Modeling, *Frontiers in Environmental Science*, 10, 892925, <https://doi.org/10.3389/fenvs.2022.892925>, 2022.
- Trinder, C. J., Johnson, D., and Artz, R. R.: Interactions among Fungal Community Structure, Litter Decomposition and Depth of Water Table in a Cutover Peatland, *FEMS Microbiology Ecology*, 64, 433–448, <https://doi.org/10.1111/j.1574-6941.2008.00487.x>, 2008.
- Tuittila, E.-S., Juutinen, S., Frohking, S., Välikanta, M., Laine, A. M., Miettinen, A., Seväkivi, M.-L., Quillet, A., and Merilä, P.: Wetland Chronosequence as a Model of Peatland Development: Vegetation Succession, Peat and Carbon Accumulation, *The Holocene*, 23, 25–35, <https://doi.org/10.1177/0959683612450197>, 2013.
- Turetsky, M. R., Crow, S. E., Evans, R. J., Vitt, D. H., and Wieder, R. K.: Trade-Offs in Resource Allocation among Moss Species Control Decomposition in Boreal Peatlands, *Journal of Ecology*, 96, 1297–1305, <https://doi.org/10.1111/j.1365-2745.2008.01438.x>, 2008.
- van Breemen, N.: How *Sphagnum* Bogs down Other Plants, p. 6, 1995.
- Vehtari, A., Gelman, A., Simpson, D., Carpenter, B., and Bürkner, P.-C.: Rank-Normalization, Folding, and Localization: An Improved R<sup>2</sup> for Assessing Convergence of MCMC (with Discussion), *Bayesian Analysis*, 16, <https://doi.org/10.1214/20-BA1221>, 2021.
- Vitt, D. H.: Growth and Production Dynamics of Boreal Mosses over Climatic, Chemical and Topographic Gradients, *Botanical Journal of the Linnean Society*, 104, 35–59, <https://doi.org/10.1111/j.1095-8339.1990.tb02210.x>, 1990.
- Walpen, N., Lau, M. P., Fiskal, A., Getzinger, G. J., Meyer, S. A., Nelson, T. F., Lever, M. A., Schroth, M. H., and Sander, M.: Oxidation of Reduced Peat Particulate Organic Matter by Dissolved Oxygen: Quantification of Apparent Rate Constants in the Field, *Environmental Science & Technology*, 52, 11151–11160, <https://doi.org/10.1021/acs.est.8b03419>, 2018.
- Yu, Z., Turetsky, M., Campbell, I., and Vitt, D.: Modelling Long-Term Peatland Dynamics. II. Processes and Rates as Inferred from Litter and Peat-Core Data, *Ecological Modelling*, 145, 159–173, [https://doi.org/10.1016/S0304-3800\(01\)00387-8](https://doi.org/10.1016/S0304-3800(01)00387-8), 2001.
- Yu, Z. C.: Northern Peatland Carbon Stocks and Dynamics: A Review, *Biogeosciences*, 9, 4071–4085, <https://doi.org/10.5194/bg-9-4071-2012>, 2012.

Zhao, B., Zhuang, Q., Treat, C., and Frolking, S.: A Model Intercomparison Analysis for Controls on C Accumulation in North American  
1120 Peatlands, *Journal of Geophysical Research: Biogeosciences*, <https://doi.org/10.1029/2021JG006762>, 2022.
